# Supplementary material
Source: PubMed Central journal article supplement (PMC2655345)

# **Stereoselective, Dual-Mode Ruthenium-Catalyzed Ring-Expansion of Alkynylcyclopropanols**

Barry M. Trost\*, Jia Xie and Nuno Maulide

*Department of Chemistry, Stanford University, Stanford, California 94305-5080*

## **Supporting Information**

### **Materials and Methods:**

All reactions were carried out under an atmosphere of nitrogen or argon in oven-dried glassware with magnetic stirring, unless otherwise indicated. Reaction solvents were dried using J. C. Meyer's Solvent Purification System passing through activated alumina prior to use. Dry acetone was distilled over drierite. All other reagents were purchased from commercial sources and used without further purification, unless otherwise indicated.

Flash Chromatography was performed using SiliCycle SilicaFlash F 60 40-60  $\mu\text{m}$  60  $\text{\AA}$  silica gel. Analytical thin-layer chromatography was performed with 0.25 mm coated commercial silica gel plates (E. Merck, DC-Glasfolien, Kieselgel 60 F254) and visualized with UV light and potassium permanganate stain. Melting points were obtained on a Thomas-Hoover apparatus in open capillary tubes and are uncorrected. Proton nuclear magnetic resonance ( $^1\text{H-NMR}$ ) data were acquired on a Varian Gemini 300 (300 MHz), Mercury 400 (400 MHz), Varian 400 (400 MHz), or on a Varian Unity Inova-500 (500 MHz) spectrometer. Carbon-13 nuclear magnetic resonance ( $^{13}\text{C-NMR}$ ) data were acquired at 100 MHz on a Mercury 400 or at 125 MHz on a Varian Unity Inova 500 spectrometer. Chemical shifts are reported in delta ( $\delta$ ) units, part per million (ppm) relative to deuteriochloroform (7.26 ppm for  $^1\text{H}$  NMR and 77.23 ppm for  $^{13}\text{C}$ ). Infrared (IR) data were recorded as films on potassium bromide (KBr) pellets on a Thermo Scientific Nicolet IR 100 FT-IR spectrometer. High resolution mass spectra were obtained from Stanford University on a Micromass Q-ToF API US Mass Spectrometer using positive electrospray ionization (+ESI). Elemental analyses were conducted by M-H-W Laboratories, Phoenix, Az.

Abbreviations:

Me = methyl

Et = ethyl

Ph = phenyl

Ind = indenyl

EA = ethyl acetate

PE = petroleum ether

**Page S2-S17: Experimental procedures**

**Page 18-end: Copies of spectra**

## Experimental procedures

### General procedure for the preparation of 1-alkynylcyclopropanols

#### Silyl- and alkyl-substituted cyclopropanols (4a-f, 10a-f)

##### 1-((Trimethylsilyl)ethynyl)cyclopropanol (**4a**)

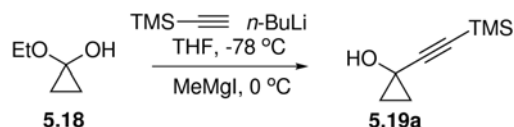

To a solution of 1-ethoxycyclopropanol **5.18** (562 mg, 5.5 mmol) in THF (15 ml) was added a 2.75 M solution of methylmagnesium iodide in THF (2.0 ml, 5.5 mmol) at 0 °C. The suspension was stirred for 30 min at 0 °C. Meanwhile, to another solution of ethynyltrimethylsilane (594 mg, 6.05 mmol) in THF (15 ml) was added dropwise a 2.30 M solution of *n*-butyllithium in THF (2.63 ml, 6.05 mmol) at -78 °C. The solution was stirred for 1h at -78 °C and then cannulated into the suspension of magnesium salt at 0 °C. The mixture was slowly warmed to room temperature with continued stirring overnight. The reaction was quenched with saturated aqueous NH<sub>4</sub>Cl (10 ml) and extracted with ether (3 times 10 ml). The combined organic layers were washed with saturated aqueous NaHCO<sub>3</sub> (10 ml) and brine (10 ml), dried over MgSO<sub>4</sub>, filtered, and concentrated in vacuo. Purification of the residue by flash chromatography (10% diethyl ether in petroleum ether, silica gel) gave **4a** (Yield: 750 mg, 88%) as a colorless liquid.

R<sub>f</sub> = 0.50 (25% ether in pet. ether) IR (neat): 3332, 2961, 2161, 1251, 843 cm<sup>-1</sup>. <sup>1</sup>H NMR (500 MHz, CDCl<sub>3</sub>): δ 3.18 (s, 1H), 1.07 – 1.04 (m, 2H), 0.98 – 0.94 (m, 2H), 0.12 (s, 9H); <sup>13</sup>C NMR (126 MHz, CDCl<sub>3</sub>): δ 107.5, 86.6, 45.7, 17.5, -0.15. Spectral data matched that reported in the literature. <sup>[1]</sup>

##### 1-((Benzyldimethylsilyl)ethynyl)cyclopropanol (**4b**)

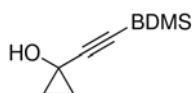

Cyclopropanol **4b** was prepared according to the general procedure using benzyl(ethynyl)dimethylsilane (526.4 mg, 3.02 mmol), 1-ethoxycyclopropanol (281 mg, 2.75 mmol), a 2.50 M solution of *n*-butyllithium in hexane (1.21 ml, 3.02 mmol), a 2.75 M solution of methylmagnesium iodide in THF (1.0 ml, 2.75 mmol). Reaction was conducted in THF (15

ml) for 12 h. Purification by flash chromatograph (10% ether in petroleum ether, silica gel) afforded **4b** (Yield: 350 mg, 55%) as a colorless oil.

$R_f = 0.27$  (10% ether in pet. ether). IR (neat): 3478, 2934, 2859, 2193, 1714, 1673, 1514, 1248, 1096, 1036, 822  $\text{cm}^{-1}$ .  $^1\text{H}$  NMR (500 MHz,  $\text{CDCl}_3$ ):  $\delta$  7.23 – 7.20 (m, 2H), 7.10 – 7.04 (m, 3H), 2.85 (s, 1H), 2.18 (s, 2H), 1.07 – 1.04 (m, 2H), 0.99 – 0.96 (m, 2H), 0.12 (s, 6H);  $^{13}\text{C}$  NMR (126 MHz,  $\text{CDCl}_3$ ):  $\delta$  138.9, 128.3, 128.1, 124.3, 108.7, 85.1, 45.8, 26.1, 17.6, -2.2. HRMS (EI) Calc'd for  $\text{C}_{14}\text{H}_{18}\text{OSi}$ : 230.1127, found: 230.1126.

### 1-((Dimethylphenylsilyl)ethynyl)cyclopropanol (**4c**)

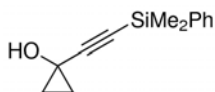

Cyclopropanol **4c** was prepared according to the general procedure using ethynyldimethylphenylsilane (705.3 mg, 4.40 mmol), 1-ethoxycyclopropanol (408.5 mg, 4.00 mmol), a 2.50 M solution of *n*-butyllithium in hexane (1.76 ml, 4.40 mmol), a 2.75 M solution of methylmagnesium iodide in THF (1.45 ml, 4.00 mmol). Reaction was conducted in THF (20 ml) for 12 h. Purification by flash chromatograph (15% ether in petroleum ether, silica gel) afforded **4c** (Yield: 600 mg, 70%) as a colorless oil.

$R_f = 0.47$  (25% ether in pet. ether). IR (neat): 3336, 2961, 2160, 1428, 1234, 1117, 821  $\text{cm}^{-1}$ .  $^1\text{H}$  NMR (500 MHz,  $\text{CDCl}_3$ ):  $\delta$  7.64 – 7.62 (m, 2H), 7.41 – 7.38 (m, 3H), 2.76 (s, 1H), 1.13 – 1.10 (m, 2H), 1.08 – 1.04 (m, 2H), 0.43 (s, 6H);  $^{13}\text{C}$  NMR (126 MHz,  $\text{CDCl}_3$ ):  $\delta$  136.8, 133.6, 129.4, 127.8, 109.0, 84.8, 46.0, 17.7, -0.93. Elemental Analysis Calc'd for  $\text{C}_{13}\text{H}_{16}\text{OSi}$ : C, 72.17; H, 7.45; Found: C, 71.96; H, 7.22.

### 1-((Triethylsilyl)ethynyl)cyclopropanol (**4d**)

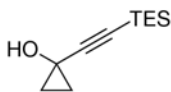

Cyclopropanol **4d** was prepared according to the general procedure using triethyl(ethynyl)silane (617.3 mg, 4.40 mmol), 1-ethoxycyclopropanol (408.5 mg, 4.00 mmol), a 2.50 M solution of *n*-butyllithium in hexane (1.76 ml, 4.40 mmol), a 2.75 M solution of methylmagnesium iodide in THF (1.45 ml, 4.00 mmol). Reaction was conducted in THF (20 ml) for 12 h. Purification by flash chromatograph (10% ether in petroleum ether, silica gel) afforded **4d** (Yield: 660 mg, 84%) as a colorless oil.

$R_f = 0.56$  (25% ether in pet. ether). IR (neat): 3346, 2956, 2877, 2159, 1459, 1235, 1020, 736  $\text{cm}^{-1}$ .  $^1\text{H}$  NMR (500 MHz,  $\text{CDCl}_3$ ):  $\delta$  2.78 (b, 1H), 1.09 – 1.06 (m, 2H), 1.00 – 0.97 (m, 2H),

0.96 (t,  $J = 8.0$  Hz, 9H), 0.57 (q,  $J = 8.0$  Hz, 6H);  $^{13}\text{C}$  NMR (126 MHz,  $\text{CDCl}_3$ ):  $\delta$  108.6, 84.0, 46.0, 17.8, 7.4, 4.3. HRMS (EI) Calc'd for  $\text{C}_{11}\text{H}_{20}\text{OSi}$ : 196.1283, found: 196.1278.

#### 1-((*tert*-Butyldimethylsilyl)ethynyl)cyclopropanol (**4e**)

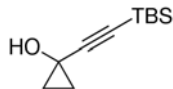

Cyclopropanol **4e** was prepared according to the general procedure using *tert*-butylethyndimethylsilane (594.2 mg, 4.24 mmol), 1-ethoxycyclopropanol (393.2 mg, 3.85 mmol), a 2.50 M solution of *n*-butyllithium in hexane (1.70 ml, 4.24 mmol), a 2.75 M solution of methylmagnesium iodide in THF (1.40 ml, 3.85 mmol). Reaction was conducted in THF (20 ml) for 12 h. Purification by flash chromatograph (10% ether in petroleum ether, silica gel) afforded **4e** (Yield: 600 mg, 80%) as a colorless oil.

$R_f = 0.50$  (25% ether in pet. ether). IR (neat): 3320, 2955, 2858, 2160, 1472, 1250, 937, 838, 776  $\text{cm}^{-1}$ .  $^1\text{H}$  NMR (500 MHz,  $\text{CDCl}_3$ ):  $\delta$  3.46 (s, 1H), 1.05 (dd,  $J_1 = 8.3$  Hz,  $J_2 = 5.4$  Hz, 2H), 0.94 (dd,  $J_1 = 8.3$  Hz,  $J_2 = 5.4$  Hz, 2H), 0.89 (s, 9H), 0.06 (s, 6H);  $^{13}\text{C}$  NMR (126 MHz,  $\text{CDCl}_3$ ):  $\delta$  108.3, 84.5, 45.7, 26.0, 17.6, 16.4, -4.7. HRMS (EI) Calc'd for  $\text{C}_{11}\text{H}_{20}\text{OSi}$ : 196.1283, found: 196.1289.

#### 1-((Triisopropylsilyl)ethynyl)cyclopropanol (**4f**)

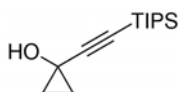

Cyclopropanol **4f** was prepared according to the general procedure using ethynltriisopropylsilane (662.0 mg, 3.63 mmol), 1-ethoxycyclopropanol (337.0 mg, 3.30 mmol), a 2.50 M solution of *n*-butyllithium in hexane (1.45 ml, 3.63 mmol), a 2.75 M solution of methylmagnesium iodide in THF (1.20 ml, 3.30 mmol). Reaction was conducted in THF (15 ml) for 12 h. Purification by flash chromatograph (10% ether in petroleum ether, silica gel) afforded **4f** (Yield: 660 mg, 84%) as a colorless oil.

$R_f = 0.55$  (25% ether in pet. ether). IR (neat): 3320, 2955, 2858, 2160, 1472, 1250, 937, 838, 776  $\text{cm}^{-1}$ .  $^1\text{H}$  NMR (500 MHz,  $\text{CDCl}_3$ ):  $\delta$  2.88 (s, 1H), 1.09 – 1.03 (m, 21H), 0.99 – 0.96 (m, 2H), 0.88 – 0.85 (m, 2H).  $^{13}\text{C}$  NMR (126 MHz,  $\text{CDCl}_3$ ):  $\delta$  109.5, 82.5, 46.0, 18.5, 17.8, 11.1. Spectral data matched that reported in the literature. <sup>[1]</sup>



## Alkyl derivatives

### 1-(Oct-1-ynyl)cyclopropanol (**10a**)

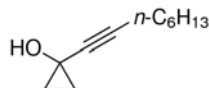

Cyclopropanol **10a** was prepared according to the general procedure using 1-octyne (770 mg, 7.00 mmol), 1-ethoxycyclopropanol (650 mg, 6.36 mmol), a 2.50 M solution of *n*-butyllithium in hexane (2.80 ml, 7.00 mmol), a 2.75 M solution of methylmagnesium iodide in THF (2.31 ml, 6.36 mmol). Reaction was conducted in THF (30 ml) for 12 h. Purification by flash chromatograph (20% ether in petroleum ether, silica gel) afforded **10a** (Yield: 850 mg, 80%) as a colorless oil.

$R_f = 0.70$  (50% ether / pet. ether): 0.70. IR (neat): 3332, 2932, 2859, 2360, 1458, 1237, 1019, 969, 882  $\text{cm}^{-1}$ .  $^1\text{H}$  NMR (500 MHz,  $\text{CDCl}_3$ ):  $\delta$  2.88 (b, 1H), 2.18 (t,  $J = 7.2$  Hz, 2H), 1.46 (quint,  $J = 7.2$  Hz, 2H), 1.38 – 1.23 (m, 6H), 1.05 – 0.98 (m, 2H), 0.89 – 0.85 (m, 5H).  $^{13}\text{C}$  NMR (126 MHz,  $\text{CDCl}_3$ ):  $\delta$  82.8, 81.7, 45.6, 31.3, 28.6, 28.5, 22.5, 18.7, 17.0, 14.0. Spectral data matched that reported in the literature. <sup>[1]</sup>

### 1-(3-Phenylprop-1-ynyl)cyclopropanol (**10b**)

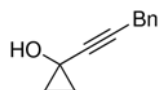

Cyclopropanol **10b** was prepared according to the general procedure using prop-2-ynylbenzene (348.5 mg, 3.02 mmol), 1-ethoxycyclopropanol (281mg, 2.75 mmol), a 2.40 M solution of *n*-butyllithium in hexane (1.25 ml, 3.02 mmol), a 2.75 M solution of methylmagnesium iodide in THF (1.0 ml, 2.75 mmol). Reaction was conducted in THF (20 ml) for 20 h. Purification by flash chromatograph (20% ether in petroleum ether, silica gel) afforded **10b** (Yield: 320 mg, 68%) as a colorless oil.

$R_f = 0.37$  (25% ether in pet. ether). IR (neat): 3383, 3030, 2887, 2240, 1604, 1495, 1454, 1235, 1019, 967, 731, 697  $\text{cm}^{-1}$ .  $^1\text{H}$  NMR (500 MHz,  $\text{CDCl}_3$ ):  $\delta$  7.31 – 7.26 (m, 4H), 7.22 – 7.19 (m, 1H), 3.58 (s, 2H), 3.17 (s, 1H), 1.04 (m, 2H), 0.93 (m, 2H).  $^{13}\text{C}$  NMR (126 MHz,  $\text{CDCl}_3$ ):  $\delta$  136.5, 128.4, 127.7, 126.5, 83.9, 80.0, 45.5, 25.0, 17.0. HRMS (EI) Calc'd for  $\text{C}_{12}\text{H}_{12}\text{O}$ : 172.0888, found: 172.0880.

### 1-(Cyclohexylethynyl)cyclopropanol (**10c**)

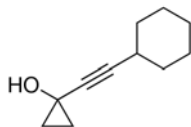

Cyclopropanol **10c** was prepared according to the general procedure using ethynylcyclohexane (458 mg, 4.24 mmol), 1-ethoxycyclopropanol (393 mg, 3.85 mmol), a 2.30 M solution of *n*-butyllithium in hexane (1.84 ml, 4.24 mmol), a 2.75 M solution of methylmagnesium iodide in THF (1.40 ml, 3.85 mmol). Reaction was conducted in THF (20 ml) for 12 h. Purification by flash chromatograph (20% ether in petroleum ether, silica gel) afforded **10c** (Yield: 520 mg, 82%) as a colorless oil.

R<sub>f</sub> = 0.43 (25% ether in pet. ether). IR (neat): 3406, 2931, 2854, 1645, 1449, 1237, 1020, 967, 887 cm<sup>-1</sup>. <sup>1</sup>H NMR (500 MHz, CDCl<sub>3</sub>): δ 2.55 (b, 1H), 2.35 (m, 1H), 1.78 – 1.75 (m, 2H), 1.69 – 1.63 (m, 2H), 1.52 – 1.47 (m, 1H), 1.43 – 1.35 (m, 2H), 1.30 – 1.23 (m, 3H), 1.03 – 1.01 (m, 2H), 0.91 – 0.88 (m, 2H); <sup>13</sup>C NMR (126 MHz, CDCl<sub>3</sub>): δ 87.0, 81.6, 45.8, 32.6, 29.0, 25.8, 24.9, 17.2. Elemental Analysis Calc'd for C<sub>11</sub>H<sub>16</sub>O: C, 80.44; H, 9.82; Found: C, 80.22; H, 9.66.

### 1-(5-(Benzyloxy)pent-1-ynyl)cyclopropanol (**10d**)

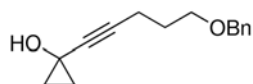

Cyclopropanol **10d** was prepared according to the general procedure using ((pent-4-ynyloxy)methyl)benzene (417 mg, 2.38 mmol), 1-ethoxycyclopropanol (290 mg, 2.84 mmol), a 2.50 M solution of *n*-butyllithium in hexane (0.96 ml, 2.40 mmol), a 2.75 M solution of methylmagnesium iodide in THF (0.80 ml, 2.20 mmol). Reaction was conducted in THF (15 ml) for 12 h. Purification by flash chromatograph (20% ether in petroleum ether, silica gel) afforded **10d** (Yield: 180 mg, 39%) as a colorless oil.

R<sub>f</sub> = 0.30 (25% ether in pet. ether). IR (neat): 3392, 2925, 2857, 1461, 1239, 1102 cm<sup>-1</sup>. <sup>1</sup>H NMR (500 MHz, CDCl<sub>3</sub>): δ 7.37 – 7.27 (m, 5H), 4.51 (s, 2H), 3.55 (t, *J* = 7.8 Hz, 2H), 2.34 (t, *J* = 8.8 Hz, 2H), 2.26 (s, 1H), 1.80 (quint, *J* = 8.2 Hz, 2H), 1.01 (dd, *J*<sub>1</sub> = 8.5 Hz, *J*<sub>2</sub> = 6.0 Hz, 2H), 0.89 (dd, *J*<sub>1</sub> = 8.5 Hz, *J*<sub>2</sub> = 6.0 Hz, 2H). <sup>13</sup>C NMR (126 MHz, CDCl<sub>3</sub>): δ 138.4, 128.3, 127.6, 127.5, 82.2, 81.9, 72.9, 68.7, 45.9, 28.8, 17.1, 15.6. HRMS (ESI) Calc'd for C<sub>15</sub>H<sub>18</sub>O<sub>2</sub> + Na: 253.1204, found: 253.1207.

### 1-(6-(Benzyloxy)hex-1-ynyl)cyclopropanol (**10e**)

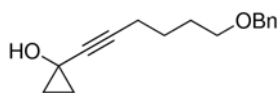

Cyclopropanol **10e** was prepared according to the general procedure using ((hexen-5-ynyloxy)methyl)benzene (414 mg, 2.20 mmol), 1-ethoxycyclopropanol (290 mg, 2.84 mmol), a 2.50 M solution of *n*-butyllithium in hexane (0.95 ml, 2.38 mmol), a 2.75 M solution of methylmagnesium iodide in THF (0.87 ml, 2.39 mmol). Reaction was conducted in THF (15

ml) for 12 h. Purification by flash chromatograph (20% ether in petroleum ether, silica gel) afforded **10e** (Yield: 276 mg, 51%) as a colorless oil.

R<sub>f</sub> = 0.33 (25% ether in pet. ether). IR (neat): 3392, 2937, 2855, 2114, 1636, 1460, 1234, 1090 cm<sup>-1</sup>. <sup>1</sup>H NMR (500 MHz, CDCl<sub>3</sub>): δ 7.39 – 7.27 (m, 5H), 4.53 (s, 2H), 3.51 (t, *J* = 7.0 Hz, 2H), 2.82 (b, 1H), 2.53 (t, *J* = 7.0 Hz, 2H), 1.77 – 1.71 (m, 2H), 1.65 – 1.59 (m, 2H), 1.03 (dd, *J*<sub>1</sub> = 8.0 Hz, *J*<sub>2</sub> = 6.0 Hz, 2H), 0.92 (dd, *J*<sub>1</sub> = 8.0 Hz, *J*<sub>2</sub> = 6.0 Hz, 2H). <sup>13</sup>C NMR (126 MHz, CDCl<sub>3</sub>): δ 138.4, 128.3, 127.6, 127.5, 82.4, 82.0, 72.8, 69.7, 45.6, 28.8, 25.3, 18.5, 17.0. HRMS (ESI) Calc'd for C<sub>16</sub>H<sub>20</sub>O<sub>2</sub> + Na: 267.1361, found: 267.1364.

### 1-(5-chloropent-1-ynyl)cyclopropanol (**10f**)

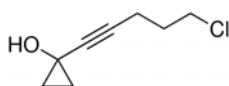

Cyclopropanol **10f** was prepared according to the general procedure using 5-chloropent-1-yne (205 mg, 2.00 mmol), 1-ethoxycyclopropanol (291 mg, 2.84 mmol), a 2.50 M solution of *n*-butyllithium in hexane (0.87 ml, 2.18 mmol), a 2.75 M solution of methylmagnesium iodide in THF (0.87 ml, 2.39 mmol). Reaction was conducted in THF (15 ml) for 12 h. Purification by flash chromatograph (20% ether in petroleum ether, silica gel) afforded **10f** (Yield: 125 mg, 39%) as a colorless oil.

R<sub>f</sub> = 0.38 (25% ether in pet. ether). IR (neat): 3359, 2959, 2929, 1467, 1231, 1061, 970 cm<sup>-1</sup>. <sup>1</sup>H NMR (500 MHz, CDCl<sub>3</sub>): δ 3.63 (t, *J* = 7.8 Hz, 2H), 2.40 (t, *J* = 8.0 Hz, 2H), 2.35 (b, 1H), 1.95 (quint, *J* = 8.0 Hz, 2H), 1.05 – 1.02 (m, 2H), 0.94 – 0.90 (m, 2H). <sup>13</sup>C NMR (126 MHz, CDCl<sub>3</sub>): δ 82.7, 80.9, 45.8, 45.7, 31.3, 17.2, 16.2. HRMS (ESI) Calc'd for C<sub>8</sub>H<sub>11</sub>ClO + Na: 214.1208, found: 214.1213.

### *EWG-substituted cyclopropanes*

#### Ethyl 3-(1-hydroxycyclopropyl)propiolate (**7b**)

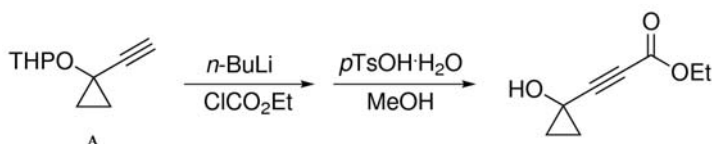

To a solution of the starting acetylene **A** (283 mg, 1.70 mmol) in THF (15 ml) was added a 2.30 M solution of *n*-butyllithium in hexane (0.74 ml, 1.70 mmol) at -78 °C. The mixture was stirred at -78 °C for 1 h followed by addition of ethyl chloroformate (0.18 ml, 1.87 mmol) at -

78 °C, and the reaction mixture was warmed to room temperature overnight during stirring. The reaction was quenched with saturated aqueous  $\text{NH}_4\text{Cl}$  (5 ml) and extracted with ether with ether (3 times 5 ml). The combined organic layers were washed with saturated aqueous  $\text{NaHCO}_3$  (10 ml) and brine (10 ml), dried over  $\text{MgSO}_4$ , filtered and concentrated in vacuo. The residue was dissolved in MeOH (5 ml) followed by addition of  $p\text{TsOH}\cdot\text{H}_2\text{O}$  (5 mg). The mixture was stirred for 30 min followed by concentrated in vacuo. The residue was then purified by flash chromatography (25% diethyl ether in petroleum ether, silica gel) to give **7b** as a colorless liquid (180 mg, 69%).

$R_f = 0.19$  (25% ether in pet. ether). IR (neat): 3402, 2986, 2225, 1712, 1312, 1228, 1036  $\text{cm}^{-1}$ .  $^1\text{H}$  NMR (500 MHz,  $\text{CDCl}_3$ ):  $\delta$  4.18 (q,  $J = 7.0$  Hz, 2H), 3.72 (s, 1H), 1.25 (t,  $J = 7.0$  Hz, 3H), 1.18 – 1.15 (m, 2H), 1.12 – 1.08 (m, 2H).  $^{13}\text{C}$  NMR (126 MHz,  $\text{CDCl}_3$ ):  $\delta$  153.8, 90.5, 74.3, 62.0, 44.5, 18.0, 13.8. Spectral data matched that reported in the literature. <sup>[1]</sup>

### Benzyl 3-(1-hydroxycyclopropyl)propiolate (**7c**)

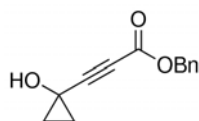

Cyclopropanol **7c** was prepared according to the general procedure using **A** (499 mg, 3.0 mmol), chlorobenzylformate (0.47 ml, 3.3 mmol), a 2.30 M solution of *n*-butyllithium in hexane (1.30 ml, 3.0 mmol) and  $p\text{TsOH}\cdot\text{H}_2\text{O}$  (5 mg). Reaction was conducted in THF (20 ml) for 15 h. Purification by flash chromatography (25% ether in petroleum ether) afforded **7c** (Yield: 480 mg, 74%) as a colorless oil.

$R_f = 0.25$  (25% ether in pet. ether). IR (neat): 3398, 3034, 2226, 1709, 1456, 1308, 1271, 1010, 748, 698  $\text{cm}^{-1}$ .  $^1\text{H}$  NMR (500 MHz,  $\text{CDCl}_3$ ):  $\delta$  7.34 – 7.25 (m, 5H), 4 (s, 2H), 3.67 (br s, 1H), 1.21 – 1.17 (m, 2H), 1.15 – 1.12 (m, 2H).  $^{13}\text{C}$  NMR (126 MHz,  $\text{CDCl}_3$ ):  $\delta$  153.5, 134.6, 128.6, 128.5, 128.4, 127.0, 74.4, 67.6, 44.8, 18.2. HRMS (EI) Calc'd for  $\text{C}_{13}\text{H}_{12}\text{O}_3$ : 216.0786, found: 216.0784.

## General procedure for the ruthenium-catalyzed ring expansion reactions

### 3-Hexylcyclopent-2-enone (**12a**)

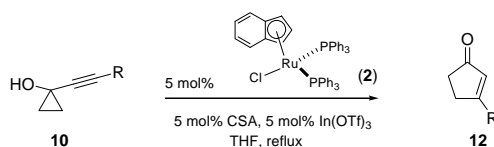

To a flame-dried flask charged with ruthenium catalyst **2** (23.3 mg, 0.03 mmol), In(OTf)<sub>3</sub> (16.9 mg, 0.03 mmol) and CSA (7.0 mg, 0.03 mmol) was added THF (2.0 ml). After the mixture was stirred for 10 min at room temperature, a solution of cyclopropanol **10a** (100 mg, 0.60 mmol) in THF (1.0 ml) was added. The solution was heated to reflux. After stirring for 4h at reflux, the solution was cooled to room temperature and concentrated in vacuo. Purification of the residue by flash chromatography (5 – 15% diethyl ether in petroleum ether, silica gel) gave **12a** as a liquid (78 mg, 78%).

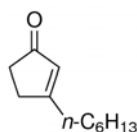

R<sub>f</sub> = 0.45 (50% ether in pet. ether). IR (neat): 2929, 2858, 1710, 1616, 1438, 1183, 840 cm<sup>-1</sup>. <sup>1</sup>H NMR (500 MHz, CDCl<sub>3</sub>): δ 5.95 (quint, *J* = 1.5 Hz, 1H), 2.60 – 2.57 (m, 2H), 2.43 – 2.40 (m, 4H), 1.59 (m, 2H), 1.36 – 1.28 (m, 6H), 0.90 (t, *J* = 7.0 Hz, 3H). <sup>13</sup>C NMR (126 MHz, CDCl<sub>3</sub>): δ 210.2, 183.3, 35.2, 33.4, 31.5, 31.4, 28.9, 27.0, 22.4, 14.0. Spectral data matched that reported in the literature.<sup>[1]</sup>

### 3-Benzylcyclopent-2-enone (**12b**)

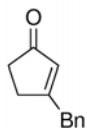

Cyclopentenone **12b** was prepared according to the general procedure using ruthenium catalyst **2** (31.1 mg, 0.040 mol), In(OTf)<sub>3</sub> (22.5 mg, 0.040 mol), CSA (9.3 mg, 0.040 mmol) and **10b** (138 mg, 0.80 mmol). Reaction was conducted in THF (16 ml) at reflux for 6 h. Purification by flash chromatograph (50% ether in petroleum ether, silica gel) afforded **12b** (112 mg, 81%) as a colorless oil.

R<sub>f</sub> = 0.22 (50% ether in pet. ether). IR (neat): 3028, 2918, 1706, 1616, 1496, 1183, 758, 702 cm<sup>-1</sup>. <sup>1</sup>H NMR (500 MHz, CDCl<sub>3</sub>): δ 7.34 – 7.30 (m, 2H), 7.27 – 7.24 (m, 1H), 7.19 – 7.16 (m, 2H), 5.89 (m, 1H), 3.71 (s, 2H), 2.57 – 2.54 (m, 2H), 2.40 – 2.38 (m, 2H). <sup>13</sup>C NMR (126 MHz, CDCl<sub>3</sub>): δ 209.8, 181.0, 136.7, 130.5, 128.8, 128.6, 126.8, 39.9, 35.4, 30.9. Spectral data matched that reported in the literature.<sup>[2]</sup>

### 3-Cyclohexylcyclopent-2-enone (**12c**)

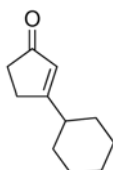

Cyclopentenone **12c** was prepared according to the general procedure using ruthenium catalyst **2** (31.1 mg, 0.040 mol), In(OTf)<sub>3</sub> (22.5 mg, 0.040 mol), CSA (9.3 mg, 0.040 mmol) and **10c** (134 mg, 0.80 mmol). Reaction was conducted in THF (16 ml) at reflux for 4 h. Purification by flash chromatograph (50% ether in petroleum ether, silica gel) afforded **12c** (115 mg, 88%) as a colorless oil.

R<sub>f</sub> = 0.25 (50% ether in pet. ether). IR (neat): 2927, 2854, 1712, 1609, 1449, 1185 cm<sup>-1</sup>. <sup>1</sup>H NMR (500 MHz, CDCl<sub>3</sub>): δ 5.87 (m, 1H), 2.56 (m, 2H), 2.34 (m, 2H), 2.29 – 2.23 (m, 1H), 1.88 – 1.83 (m, 2H), 1.79 – 1.75 (m, 2H), 1.70 – 1.66 (m, 1H), 1.34 – 1.14 (m, 5H). <sup>13</sup>C NMR (126 MHz, CDCl<sub>3</sub>): δ 210.4, 187.6, 127.8, 41.8, 34.9, 31.1, 29.5, 25.9, 25.8. Spectral data matched that reported in the literature.<sup>[2]</sup>

### 3-(3-(Benzyloxy)propyl)cyclopent-2-enone (**12d**)

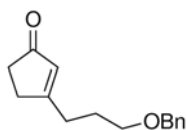

Cyclopentenone **12d** was prepared according to the general procedure using ruthenium catalyst **2** (7.8 mg, 0.010 mol), In(OTf)<sub>3</sub> (5.6 mg, 0.010 mol), CSA (2.3 mg, 0.010 mmol) and **10d** (46 mg, 0.050 mmol). Reaction was conducted in THF (2 ml) at reflux for 2 h. Purification by flash chromatograph (50% ether in petroleum ether, silica gel) afforded **12d** (35 mg, 76%) as a colorless oil.

R<sub>f</sub> = 0.24 (50% ether in pet. ether). IR (neat): 2928, 2858, 1704, 1654, 1611, 1124 cm<sup>-1</sup>. <sup>1</sup>H NMR (500 MHz, CDCl<sub>3</sub>): δ 7.27 – 7.26 (m, 5H), 5.95 – 5.93 (m, 1H), 4.50 (s, 2H), 3.52 (t, *J* = 7.8 Hz, 2H), 2.59 – 2.56 (m, 2H), 2.52 (t, *J* = 8.0 Hz, 2H), 2.40 – 2.38 (m, 2H), 1.93 – 1.86 (m, 2H). <sup>13</sup>C NMR (126 MHz, CDCl<sub>3</sub>): δ 210.1, 182.5, 138.2, 129.4, 128.4, 127.7, 127.6, 73.0, 69.2, 35.2, 31.5, 30.3, 27.2. HRMS (ESI) Calc'd for C<sub>15</sub>H<sub>18</sub>O<sub>2</sub> + Na: 253.1204; found: 253.1206.

### 3-(4-(Benzyloxy)butyl)cyclopent-2-enone (**12e**)

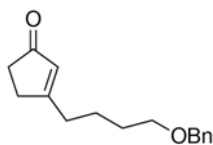

Cyclopentenone **12e** was prepared according to the general procedure using ruthenium catalyst **2** (2.2 mg, 0.0028 mol), In(OTf)<sub>3</sub> (1.6 mg, 0.0028 mol), CSA (1.7 mg, 0.0073 mmol) and **10e** (35 mg, 0.014 mmol). Reaction was conducted in THF (2 ml) at reflux for 2 h. Purification by flash chromatograph (40% ether in petroleum ether, silica gel) afforded **12e** (23 mg, 68%) as a colorless oil.

R<sub>f</sub> = 0.28 (50% ether in pet. ether). IR (neat): 2931, 2858, 1708, 1671, 1616, 1279, 1114 cm<sup>-1</sup>. <sup>1</sup>H NMR (500 MHz, CDCl<sub>3</sub>): δ 7.31 – 7.26 (m, 5H), 5.96 – 5.94 (m, 1H), 4.50 (s, 2H), 3.50 (t, *J* = 7.5 Hz, 2H), 2.58 – 2.55 (m, 2H), 2.44 – 2.38 (m, 4H), 1.71 – 1.64 (m, 4H). <sup>13</sup>C NMR (126 MHz, CDCl<sub>3</sub>): δ 210.2, 182.8, 138.4, 129.5, 128.4, 127.6(2), 73.0, 69.7, 35.3, 33.3, 31.5, 29.4, 23.8. Spectra matched that reported in the literature.<sup>[3]</sup>

### 3-(3-Chloropropyl)cyclopent-2-enone (**12f**)

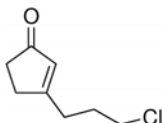

Cyclopentenone **12f** was prepared according to the general procedure using ruthenium catalyst **2** (12.2 mg, 0.0157 mol), In(OTf)<sub>3</sub> (8.9 mg, 0.0158 mol), CSA (3.7 mg, 0.0159 mmol) and **10f** (50 mg, 0.315 mmol). Reaction was conducted in THF (3 ml) at reflux for 2 h. Purification by flash chromatograph (50% ether in petroleum ether, silica gel) afforded **12f** (34 mg, 74%) as a colorless volatile oil.

R<sub>f</sub> = 0.30 (50% ether in pet. ether). IR (neat): 2947, 2918, 1710, 1681, 1617, 1441, 1185 cm<sup>-1</sup>. <sup>1</sup>H NMR (500 MHz, CDCl<sub>3</sub>): δ 5.96 (quint, *J* = 2.0 Hz, 1H), 3.58 (t, *J* = 8.0 Hz, 2H), 2.61 – 2.55 (m, 4H), 2.42 – 2.39 (m, 2H), 2.09 – 2.02 (m, 2H). <sup>13</sup>C NMR (126 MHz, CDCl<sub>3</sub>): δ 209.7, 180.8, 129.8, 44.0, 35.2, 31.6, 30.5, 29.7. Spectra matched that reported in the literature.<sup>[4]</sup>

### Silyl substituted cyclobutanones

#### (*Z*)-2-((Trimethylsilyl)methylene)cyclobutanone (**5a**)

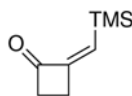

Cyclobutanone **5a** was prepared according to the general procedure using ruthenium catalyst **2** (31.0 mg, 0.040 mol), In(OTf)<sub>3</sub> (22.5 mg, 0.040 mol), CSA (9.3 mg, 0.040 mmol) and **4a** (123.4 mg, 0.80 mmol). Reaction was conducted in THF (16 ml) at reflux for 2 h, giving *Z*-**5a** (Yield: 102.4 mg, 83%) and *E*-**6a** (Yield: 18.5 mg, 15%) with a 5.7:1 *Z/E* ratio (Yield and *Z/E* ratio were determined by <sup>1</sup>H NMR of protons of the vinyl group on the cyclobutanone using mesitylene (12.2 mg, 0.10 mmol) as the internal standard). Purification by flash chromatograph (4% ether in petroleum ether, silica gel) afforded *Z*-**5a** and *E*-**6a** as colorless oils.

R<sub>f</sub> = 0.39 (5% ether in pet. ether). IR (neat): 2956, 1754, 1622, 1248, 1067, 850 cm<sup>-1</sup>. <sup>1</sup>H NMR (500 MHz, CDCl<sub>3</sub>): δ 5.95 (t, *J* = 2.4 Hz, 1H), 2.89 – 2.86 (m, 2H), 2.62 – 2.58 (m, 2H), 0.16 (s, 9H). <sup>13</sup>C NMR (126 MHz, CDCl<sub>3</sub>): δ 200.3, 162.0, 138.0, 42.8, 24.3, -1.1. Spectral data matched that reported in the literature. <sup>[5]</sup>

**(E)-2-((Trimethylsilyl)methylene)cyclobutanone (6a)**

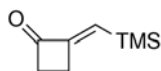

R<sub>f</sub> = 0.25 (5% ether in pet. ether). IR (neat): 2957, 1766, 1628, 1250, 1077, 853 cm<sup>-1</sup>. <sup>1</sup>H NMR (500 MHz, CDCl<sub>3</sub>): δ 6.37 (t, *J* = 2.9 Hz, 1H), 2.99 (m, 2H), 2.71 (m, 2H), 0.17 (s, 9H). <sup>13</sup>C NMR (126 MHz, CDCl<sub>3</sub>): δ 199.6, 161.4, 130.4, 44.6, 24.0, -1.2. Spectral data matched that reported in the literature. <sup>[5]</sup>

**(Z)-2-((Benzilydimethylsilyl)methylene)cyclobutanone (5b)**

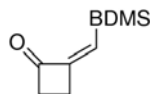

Cyclobutanone **5b** was prepared according to the general procedure using ruthenium catalyst **2** (17.5 mg, 0.0225 mol), In(OTf)<sub>3</sub> (12.6 mg, 0.0225 mol), CSA (5.2 mg, 0.0225 mmol) and **4b** (104 mg, 0.45 mmol). Reaction was conducted in THF (9 ml) at reflux for 4 h, giving *Z*-**5b** (Yield: 80 mg, 77%) and *E*-**6b** (Yield: 13 mg, 12.5%) with a 6.0:1 *Z/E* ratio (Yield and *Z/E* ratio were determined by <sup>1</sup>H NMR of protons of the vinyl group on the cyclobutanone using mesitylene (15.2 mg, 0.182 mmol) as the internal standard). Purification by flash chromatography (5% ether in petroleum ether, silica gel) afforded *Z*-**5b** and *E*-**6b** as colorless oils.

R<sub>f</sub> = 0.61 (10% ether in pet. ether). IR (neat): 2956, 1751, 1600, 1493, 1248, 1057, 846, 670 cm<sup>-1</sup>. <sup>1</sup>H NMR (500 MHz, CDCl<sub>3</sub>): δ 7.23 – 7.20 (m, 2H), 7.10 – 7.06 (m, 1H), 7.03 – 7.01 (m, 2H), 5.92 (t, *J* = 2.5 Hz, 1H), 2.93 – 2.89 (m, 2H), 2.64 – 2.60 (m, 2H), 2.28 (s, 2H), 0.16 (s, 6H); <sup>13</sup>C NMR (126 MHz, CDCl<sub>3</sub>): δ 200.3, 162.8, 139.6, 135.8, 128.2, 128.1, 124.1, 42.9, 25.3, 24.4, -3.1. HRMS (EI) Calc'd for C<sub>14</sub>H<sub>18</sub>OSi: 203.1127, found: 230.1131.

**(E)-2-((benzyldimethylsilyl)methylene)cyclobutanone (6b)**

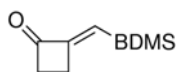



R<sub>f</sub> = 0.46 (10% ether in pet. ether). IR (neat): 2957, 1762, 1600, 1493, 1250, 1078, 847, 700 cm<sup>-1</sup>. <sup>1</sup>H NMR (500 MHz, CDCl<sub>3</sub>): δ 7.23 – 7.20 (m, 2H), 7.11 – 7.07 (m, 1H), 7.00 – 6.98 (m, 2H), 6.34 (t, *J* = 2.9 Hz, 1H), 2.96 – 2.92 (m, 2H), 2.50 – 2.46 (m, 2H), 2.20 (s, 2H), 0.15 (s, 6H); <sup>13</sup>C NMR (126 MHz, CDCl<sub>3</sub>): δ 199.3, 162.7, 138.8, 128.3, 128.2, 124.4, 44.6, 25.6, 24.0, -3.2. HRMS (EI) Calc'd for C<sub>14</sub>H<sub>18</sub>OSi: 203.1127, found: 230.1128.

**(Z)-2-((Dimethyl(phenyl)silyl)methylene)cyclobutanone (5c)**

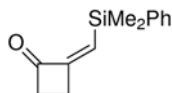

Cyclobutanone **5c** was prepared according to the general procedure using ruthenium catalyst **2** (50.4 mg, 0.065 mol), In(OTf)<sub>3</sub> (36.5 mg, 0.065 mol), CSA (15.1 mg, 0.065 mmol) and **4c** (281 mg, 1.30 mmol). Reaction was conducted in THF (26 ml) at reflux for 2 h, giving *Z*-**5c** (Yield: 230 mg, 82%) and *E*-**6c** (Yield: 40 mg, 14%) with a 6.0:1 *Z/E* ratio (Yield and *Z/E* ratio were determined by <sup>1</sup>H NMR of protons of the vinyl group on the cyclobutanone using mesitylene (14.5 mg, 0.121 mmol) as the internal standard). Purification by flash chromatography (5–10% ether in petroleum ether, silica gel) afforded *Z*-**5c** and *E*-**6c** as colorless oils.

R<sub>f</sub> = 0.29 (5% ether in pet. ether). IR (neat): 2958, 1753, 1622, 1428, 1271, 1062, 843 cm<sup>-1</sup>. <sup>1</sup>H NMR (500 MHz, CDCl<sub>3</sub>): δ 7.61 – 7.59 (m, 2H), 7.39 – 7.37 (m, 3H), 6.09 (t, *J* = 2.5 Hz, 1H), 2.93 – 2.90 (m, 2H), 2.68 – 2.64 (m, 2H), 0.51 (s, 6H). <sup>13</sup>C NMR (126 MHz, CDCl<sub>3</sub>): δ 200.0, 163.0, 138.1, 135.6, 133.6, 129.1, 127.8, 42.9, 24.5, -2.5. HRMS (EI) Calc'd for C<sub>13</sub>H<sub>16</sub>OSi - H: 215.0892, found: 215.0899.

**(E)-2-((dimethyl(phenyl)silyl)methylene)cyclobutanone (6c)**

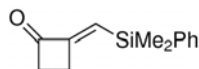

R<sub>f</sub> = 0.13 (5% ether in pet. ether). IR (neat): 3070, 2958, 1763, 1627, 1428, 1250, 1082, 843, 733, 700 cm<sup>-1</sup>. <sup>1</sup>H NMR (500 MHz, CDCl<sub>3</sub>): δ 7.54 – 7.52 (m, 2H), 7.40 – 7.37 (m, 3H), 6.50 (t, *J* = 2.8 Hz, 1H), 2.97 (t, *J* = 8.2 Hz, 2H), 2.56 (t, *J*<sub>1</sub> = 8.2 Hz, *J*<sub>2</sub> = 2.8 Hz, 2H), 0.45 (s, 6H); <sup>13</sup>C NMR (126 MHz, CDCl<sub>3</sub>): δ 199.4, 162.7, 136.8, 133.7, 129.5, 128.1, 128.0, 44.7, 24.1, -2.5. HRMS (EI) Calc'd for C<sub>13</sub>H<sub>16</sub>OSi - H: 215.0892, found [M-H]<sup>+</sup>: 215.0899.

**(Z)-2-(Triethylsilylmethylene)cyclobutanone (5d)**

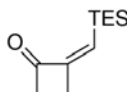

**5d** was prepared according to the general procedure of the ruthenium-catalyzed ring expansion reaction starting from **4d** (196.4 mg, 1.00 mmol). *Z/E* = 10 : 1 (crude NMR). NMR yield: *Z-5d*: 172.8 mg (88%), *E-6d*: 17.7 mg (9%). Isolated yield of *Z-5d*: 150 mg (76%).

*R<sub>f</sub>* = 0.50 (5% ether in pet. ether). IR (neat): 2954, 2875, 1756, 1273, 1062, 742 cm<sup>-1</sup>. <sup>1</sup>H NMR (500 MHz, CDCl<sub>3</sub>): δ 5.89 (t, *J* = 2.4 Hz, 1H), 2.88 – 2.84 (m, 2H), 2.63 – 2.59 (m, 2H), 0.90 (t, *J* = 8.0 Hz, 9H), 0.69 (q, *J* = 8.0 Hz, 6H). <sup>13</sup>C NMR (126 MHz, CDCl<sub>3</sub>): δ 200.2, 163.1, 135.0, 42.7, 24.5, 7.4, 3.5. HRMS (EI) Calc'd for C<sub>11</sub>H<sub>20</sub>OSi - C<sub>2</sub>H<sub>5</sub> (Et): 167.0892, found: 167.0891.

**(*E*)-2-(triethylsilylmethylene)cyclobutanone (**6d**)**

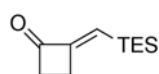

*R<sub>f</sub>* = 0.33 (5% ether in pet. ether). IR (neat): 2955, 1762, 1646, 1078 cm<sup>-1</sup>. <sup>1</sup>H NMR (500 MHz, CDCl<sub>3</sub>): δ 6.39 (t, *J* = 2.8 Hz, 1H), 3.01 – 2.98 (m, 2H), 2.73 – 2.69 (m, 2H), 0.96 (t, *J* = 7.9 Hz, 9H), 0.66 (q, *J* = 7.9 Hz, 6H). <sup>13</sup>C NMR (126 MHz, CDCl<sub>3</sub>): δ 199.3, 162.5, 128.3, 44.5, 24.3, 7.3, 3.4. HRMS (EI) Calc'd for C<sub>11</sub>H<sub>20</sub>OSi: 196.1283, found: 196.1287.

**(*Z*)-2-((*tert*-Butyldimethylsilyl)methylene)cyclobutanone (**5e**)**

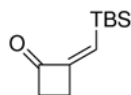

Cyclobutanone **5e** was prepared according to the general procedure using ruthenium catalyst **2** (31.1 mg, 0.040 mol), In(OTf)<sub>3</sub> (22.5 mg, 0.040 mol), CSA (9.3 mg, 0.040 mmol) and **4e** (157 mg, 0.80 mmol). Reaction was conducted in THF (16 ml) at reflux for 2 h, giving *Z-5e* (Yield: 141.3 mg, 90%) and *E-6e* (Yield: 12.6 mg, 8%) with a 11.4:1 *Z/E* ratio (Yield and *Z/E* ratio were determined by <sup>1</sup>H NMR of protons of the vinyl group on the cyclobutanone using mesitylene (14.0 mg, 0.117 mmol) as the internal standard). Purification by flash chromatography (5% ether in petroleum ether, silica gel) afforded *Z-5e* and *E-6e* as colorless oils.

*R<sub>f</sub>* = 0.31 (5% ether in pet. ether). IR (neat): 2953, 2857, 1755, 1470, 1249, 1061, 845 cm<sup>-1</sup>. <sup>1</sup>H NMR (500 MHz, CDCl<sub>3</sub>): δ 5.95 (t, *J* = 2.4 Hz, 1H), 2.87 – 2.83 (m, 2H), 2.63 – 2.59 (m, 2H), 0.88 (s, 9H), 0.14 (s, 6H). <sup>13</sup>C NMR (126 MHz, CDCl<sub>3</sub>): δ 200.0, 163.2, 135.6, 42.7, 26.2, 24.5, 16.9, -5.7. HRMS (EI) Calc'd for C<sub>11</sub>H<sub>20</sub>OSi - C<sub>4</sub>H<sub>9</sub> (*t*-Bu): 139.0579, found: 139.0565.

**(*E*)-2-((*tert*-butyldimethylsilyl)methylene)cyclobutanone (**6e**)**

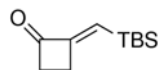

$R_f = 0.19$  (5% ether in pet. ether). IR (neat): 2953, 2857, 1764, 1471, 1250, 1078, 842  $\text{cm}^{-1}$ .  $^1\text{H}$  NMR (500 MHz,  $\text{CDCl}_3$ ):  $\delta$  6.42 (t,  $J = 2.9$  Hz, 1H), 3.01 – 2.98 (m, 2H), 2.74 – 2.70 (m, 2H), 0.91 (s, 9H), 0.12 (s, 6H);  $^{13}\text{C}$  NMR (126 MHz,  $\text{CDCl}_3$ ):  $\delta$  199.4, 162.6, 128.6, 44.6, 26.2, 24.4, 17.2, -5.7. HRMS (EI) Calc'd for  $\text{C}_{11}\text{H}_{20}\text{OSi}$ : 196.1283, found: 196.1280.

**(Z)-2-((Triisopropylsilyl)methylene)cyclobutanone (5f)**

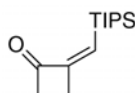

Cyclobutanone **5f** was prepared according to the general procedure using ruthenium catalyst **2** (15.5 mg, 0.020 mol),  $\text{In}(\text{OTf})_3$  (11.3 mg, 0.020 mol), CSA (4.7 mg, 0.020 mmol) and **4f** (95.4 mg, 0.40 mmol). Reaction was conducted in THF (8 ml) at reflux for 2 h, giving **Z-5f** (Yield: 85.9 mg, 90%) only (determined by  $^1\text{H}$  NMR of protons of the vinyl group on the cyclobutanone using mesitylene (12.6 mg, 0.105 mmol) as the internal standard). Purification by flash chromatograph (3% ether in petroleum ether, silica gel) afforded **Z-5f** (83 mg, 87%) as a colorless oil.

$R_f = 0.50$  (5% ether in pet. ether). IR (neat): 2940, 2869, 1752, 1624, 1463, 1274, 1058, 882  $\text{cm}^{-1}$ .  $^1\text{H}$  NMR (500 MHz,  $\text{CDCl}_3$ ):  $\delta$  5.86 (t,  $J = 2.5$  Hz, 1H), 2.88 – 2.84 (m, 2H), 2.67 – 2.63 (m, 2H), 1.33 (quint,  $J = 7.5$  Hz, 3H), 1.02 (d,  $J = 7.5$  Hz, 18H).  $^{13}\text{C}$  NMR (126 MHz,  $\text{CDCl}_3$ ):  $\delta$  200.0, 163.9, 133.8, 42.6, 24.9, 18.7, 11.5. HRMS (EI) Calc'd for  $\text{C}_{14}\text{H}_{26}\text{OSi}$ : 238.1753, found: 238.1753.

*EWG-substituted cyclobutanones*

NB: Only one olefin geometry was observed in these reactions, and it was assigned based on the chemical shift of the vinyl proton by comparing with analogous silyl and alkyl substituted cyclobutanones.

**(Z)-2-(2-Cyclohexyl-2-oxoethylidene)cyclobutanone (8a)**

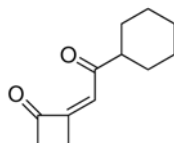

Cyclobutanone **8a** was prepared according to the general procedure using ruthenium catalyst **2** (15.5 mg, 0.020 mmol),  $\text{In}(\text{OTf})_3$  (11.2 mg, 0.020 mmol), CSA (4.6 mg, 0.020 mmol) and **7a** (76.9 mg, 0.40 mmol). Reaction was conducted in THF (8 ml) at reflux for 12 h. Purification

by flash chromatograph (20% ether in petroleum ether, silica gel) afforded **Z-8a** (Yield: 68 mg, 88%) as a colorless oil (The configuration was assigned based on  $^1\text{H}$  NMR of protons of the vinyl group).

$R_f = 0.75$  (50% ether in pet. Ether). IR (neat): 2931, 2855, 1764, 1693, 1450, 1336, 1109, 1012  $\text{cm}^{-1}$ .  $^1\text{H}$  NMR (400 MHz,  $\text{CDCl}_3$ ):  $\delta$  6.52 (t,  $J = 3.0$  Hz, 1H), 3.16 – 3.11 (m, 2H), 3.05 – 2.99 (m, 2H), 2.51 – 2.44 (m, 1H), 1.86 – 1.82 (m, 2H), 1.79 – 1.74 (m, 2H), 1.68 – 1.64 (m, 1H), 1.36 – 1.15 (m, 5H).  $^{13}\text{C}$  NMR (126 MHz,  $\text{CDCl}_3$ ):  $\delta$  203.9, 200.5, 159.4, 117.7, 51.6, 46.7, 27.9, 25.7, 25.4, 24.7. HRMS (EI) Calc'd for  $\text{C}_{12}\text{H}_{16}\text{O}_2$ : 192.1150, found: 192.1155.

#### (Z)-Ethyl 2-(2-oxocyclobutylidene)acetate (**8b**)

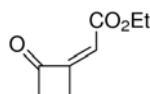

Cyclobutanone **8b** was prepared according to the general procedure using ruthenium catalyst **2** (27.2 mg, 0.035 mmol),  $\text{In}(\text{OTf})_3$  (19.7 mg, 0.035 mmol), CSA (8.1 mg, 0.035 mmol) and **7b** (108 mg, 0.70 mmol). Reaction was conducted in THF (14 ml) at reflux for 8 h. Purification by flash chromatograph (15% ether in petroleum ether, silica gel) afforded **Z-8b** (Yield: 73 mg, 68%) as a colorless oil (The configuration was assigned based on  $^1\text{H}$  NMR of protons of the vinyl group).

$R_f = 0.48$  (25% ether in pet. ether). IR (neat): 2984, 1769, 1716, 1659, 1330, 1201, 1096, 875  $\text{cm}^{-1}$ .  $^1\text{H}$  NMR (500 MHz,  $\text{CDCl}_3$ ):  $\delta$  6.19 (t,  $J = 3.0$  Hz, 1H), 4.22 (q,  $J = 7.2$  Hz, 2H), 3.14 – 3.10 (m, 2H), 3.06 – 3.02 (m, 2H), 1.30 (t,  $J = 7.1$  Hz, 3H).  $^{13}\text{C}$  NMR (126 MHz,  $\text{CDCl}_3$ ):  $\delta$  198.8, 165.2, 161.9, 114.4, 61.0, 45.9, 24.3 14.1. HRMS (EI) Calc'd for  $\text{C}_8\text{H}_{10}\text{O}_3$ : 154.0630, found: 154.0635.

#### (Z)-Benzyl 2-(2-oxocyclobutylidene)acetate (**8c**)

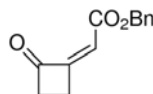

Cyclobutanone **8c** was prepared according to the general procedure using ruthenium catalyst **2** (19.4 mg, 0.025 mmol),  $\text{In}(\text{OTf})_3$  (14.1 mg, 0.025 mmol), CSA (5.8 mg, 0.025 mmol) and **7c** (108 mg, 0.50 mmol). Reaction was conducted in THF (10 ml) at reflux for 6 h. Purification by flash chromatograph (20% ether in petroleum ether, silica gel) afforded **Z-8c** (Yield: 88 mg, 81%) as a colorless oil (The configuration was assigned based on  $^1\text{H}$  NMR of protons of the vinyl group).

R<sub>f</sub> = 0.43 (25% ether in pet. Ether). IR (neat): 3034, 2945, 1767, 1715, 1660, 1455, 1329, 1269, 1168, 1095, 1017, 876, 746, 699 cm<sup>-1</sup>. <sup>1</sup>H NMR (400 MHz, CDCl<sub>3</sub>): δ 7.39 – 7.35 (m, 5H), 6.26 (t, *J* = 2.8 Hz, 1H), 7 (s, 2H), 3.16 – 3.11 (m, 2H), 3.08 – 3.02 (m, 2H). <sup>13</sup>C NMR (126 MHz, CDCl<sub>3</sub>): δ 198.6, 165.0, 162.4, 135.3, 128.6, 128.4, 128.3, 114.1, 66.8, 45.9, 24.4. HRMS (EI) Calc'd for C<sub>13</sub>H<sub>12</sub>O<sub>3</sub>: 216.0786, found: 216.0792.

### (*Z*)-4-Nitrophenyl 2-(2-oxocyclobutylidene)acetate (**8d**)

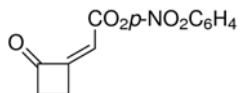

Cyclobutanone **8d** was prepared according to the general procedure using ruthenium catalyst **2** (15.5 mg, 0.020 mmol), In(OTf)<sub>3</sub> (11.2 mg, 0.020 mmol), CSA (4.6 mg, 0.020 mmol) and **7d** (98.9 mg, 0.40 mmol). Reaction was conducted in THF (8 ml) at reflux for 12 h. Purification by flash chromatograph (25% ether in petroleum ether, silica gel) afforded *Z*-**8d** (Yield: 84 mg, 85%) as a white solid (The configuration was assigned based on <sup>1</sup>H NMR of protons of the vinyl group).

Isolated yield: 84 mg (85%). M.P.: 95 – 97 °C.

R<sub>f</sub> = 0.62 (50% ether in pet. Ether). IR (neat): 1764, 1732, 1612, 1520, 1349, 1148, 858, 731 cm<sup>-1</sup>. <sup>1</sup>H NMR (400 MHz, CDCl<sub>3</sub>): δ 8.31 (m, 2H), 7.36 (m, 2H), 6.45 (t, *J* = 3.0 Hz, 1H), 3.28 – 3.23 (m, 2H), 3.20 – 3.14 (m, 2H). <sup>13</sup>C NMR (126 MHz, CDCl<sub>3</sub>): δ 197.8, 165.4, 162.5, 154.8, 145.5, 125.3, 122.2, 112.6, 46.3, 24.8. Elemental Analysis Calc'd for C<sub>12</sub>H<sub>9</sub>NO<sub>5</sub>: C, 58.30; H, 3.67; N, 5.67; found: C, 58.50; H, 4.00; N, 5.84. HRMS(EI) Calc'd for C<sub>12</sub>H<sub>9</sub>NO<sub>5</sub>: 247.0481; found: 247.0484.

### References

1. Iwasawa, N.; Matsuo, T.; Iwamoto, M.; Ikeno, T. *J. Am. Chem. Soc.* **1998**, *120*, 3903-3914.
2. Collins, S.; Hong, Y.; Kataoka, M. *J. Org. Chem.* **1990**, *55*, 3395-3398.
3. Moritani, Y.; Yasunori, A.; Appella, D. H.; Jurkauskas, V.; Buchwald, S. L. *J. Am. Chem. Soc.* **2000**, *122*, 6797-6798.
4. Laroche, C.; Bertus, P.; Szymoniak, J. *Chem. Commun.* **2005**, *24*, 3030-3032.
5. Markham, J. P.; Staben, S. T.; Toste, F. D. *J. Am. Chem. Soc.* **2005**, *127*, 9708-9709.

## Copies of Spectra



BDMS

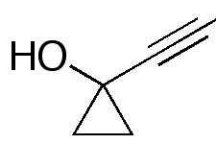

5.19b

FT size 131072  
Total time 34 min, 17 sec

12  
12

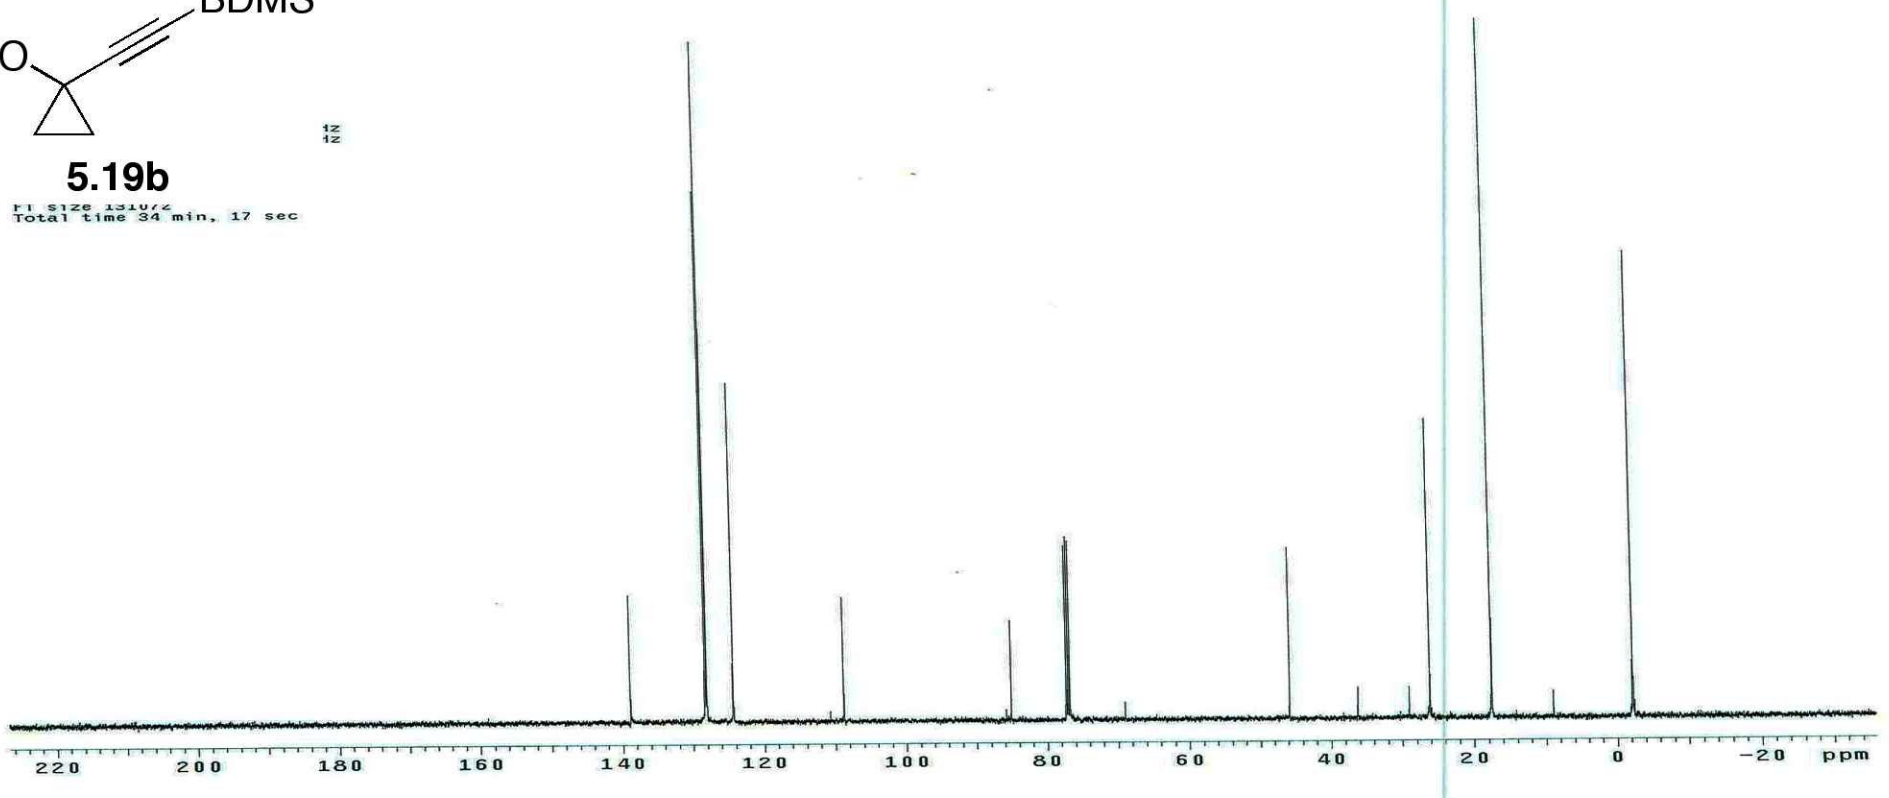

JX-XV-78  
 Pulse Sequence: s2pu1  
 Solvent: CDCl3  
 Ambient temperature  
 INOVA-500 "ui500"  
 Pulse 60.0 degrees  
 Acq. time 4.000 sec  
 Width 8000.0 Hz  
 12 repetitions  
 OBSERVE H1, 499.7485939 MHz  
 DATA PROCESSING  
 FT size 131072  
 Total time 1 min, 4 sec

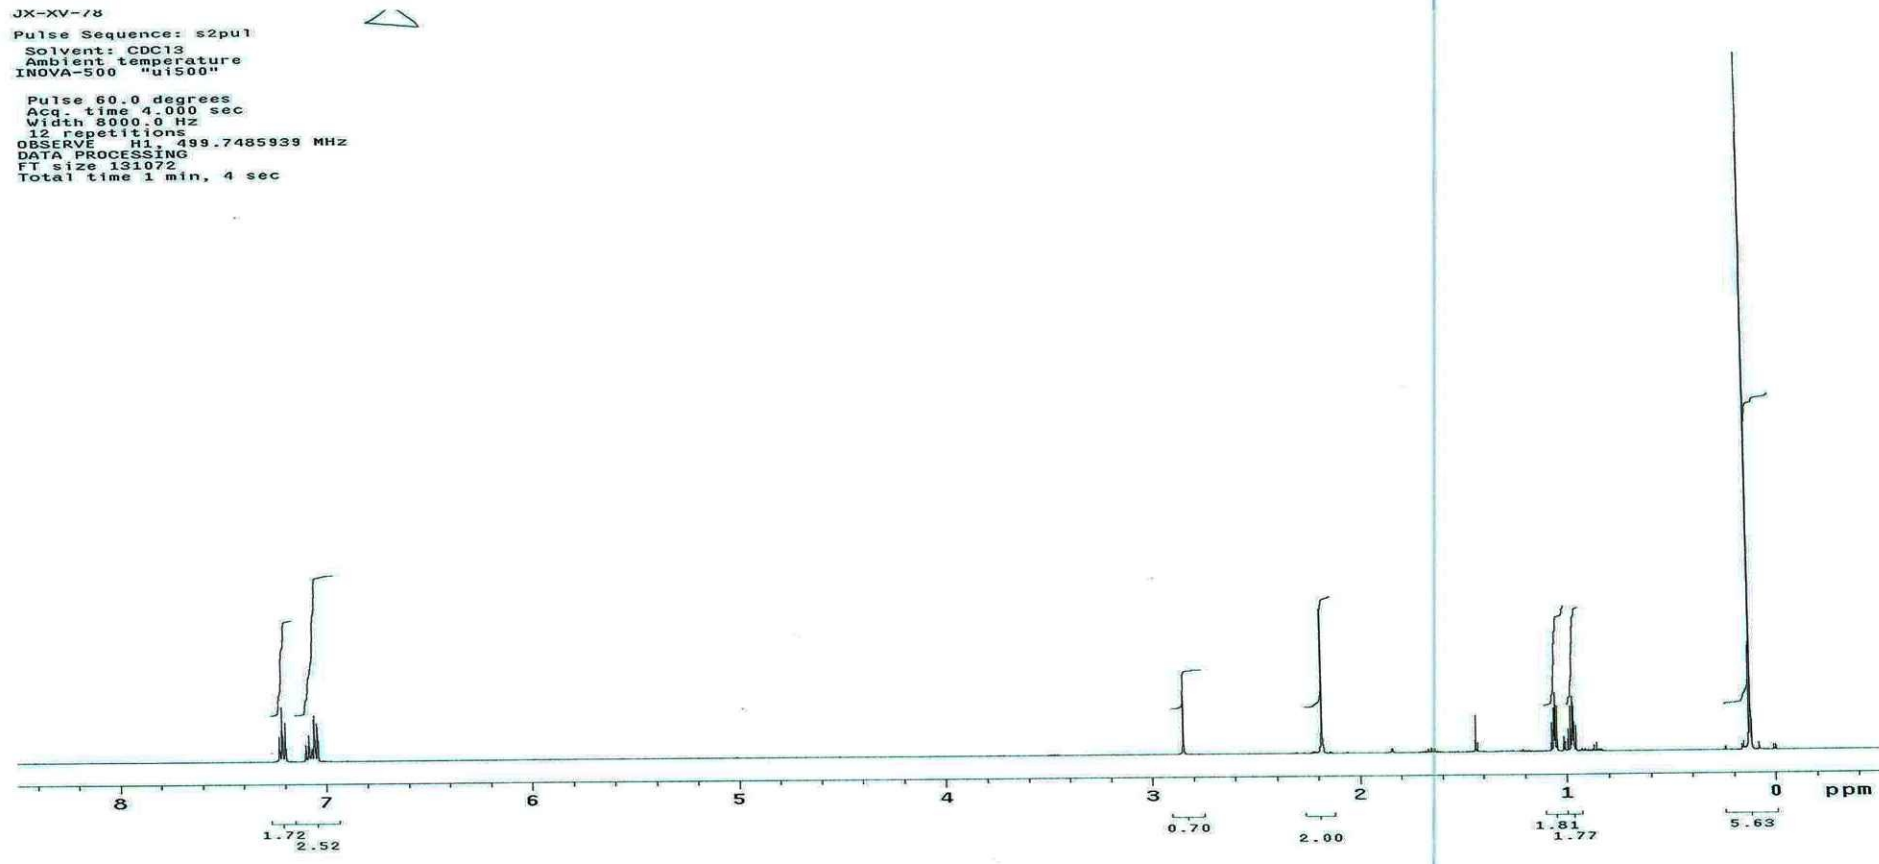

PERKIN ELMER

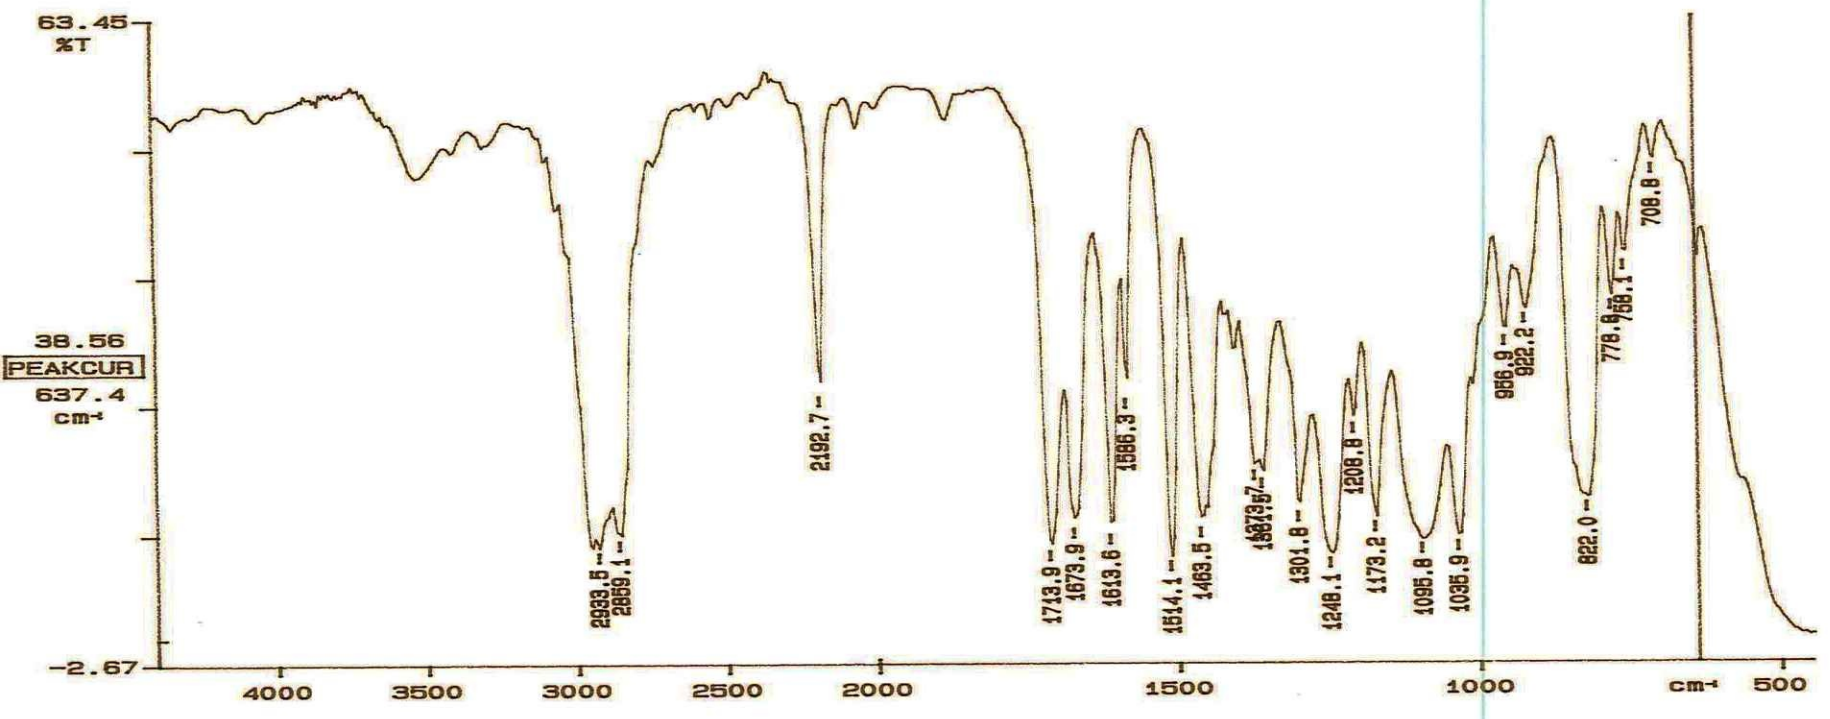

06/10/10 16:07  
X: 4 scans, 4.0cm-1, flat



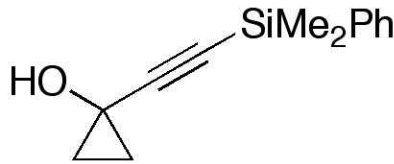

5.19c

FT size 131072  
Total time 34 min, 17 sec

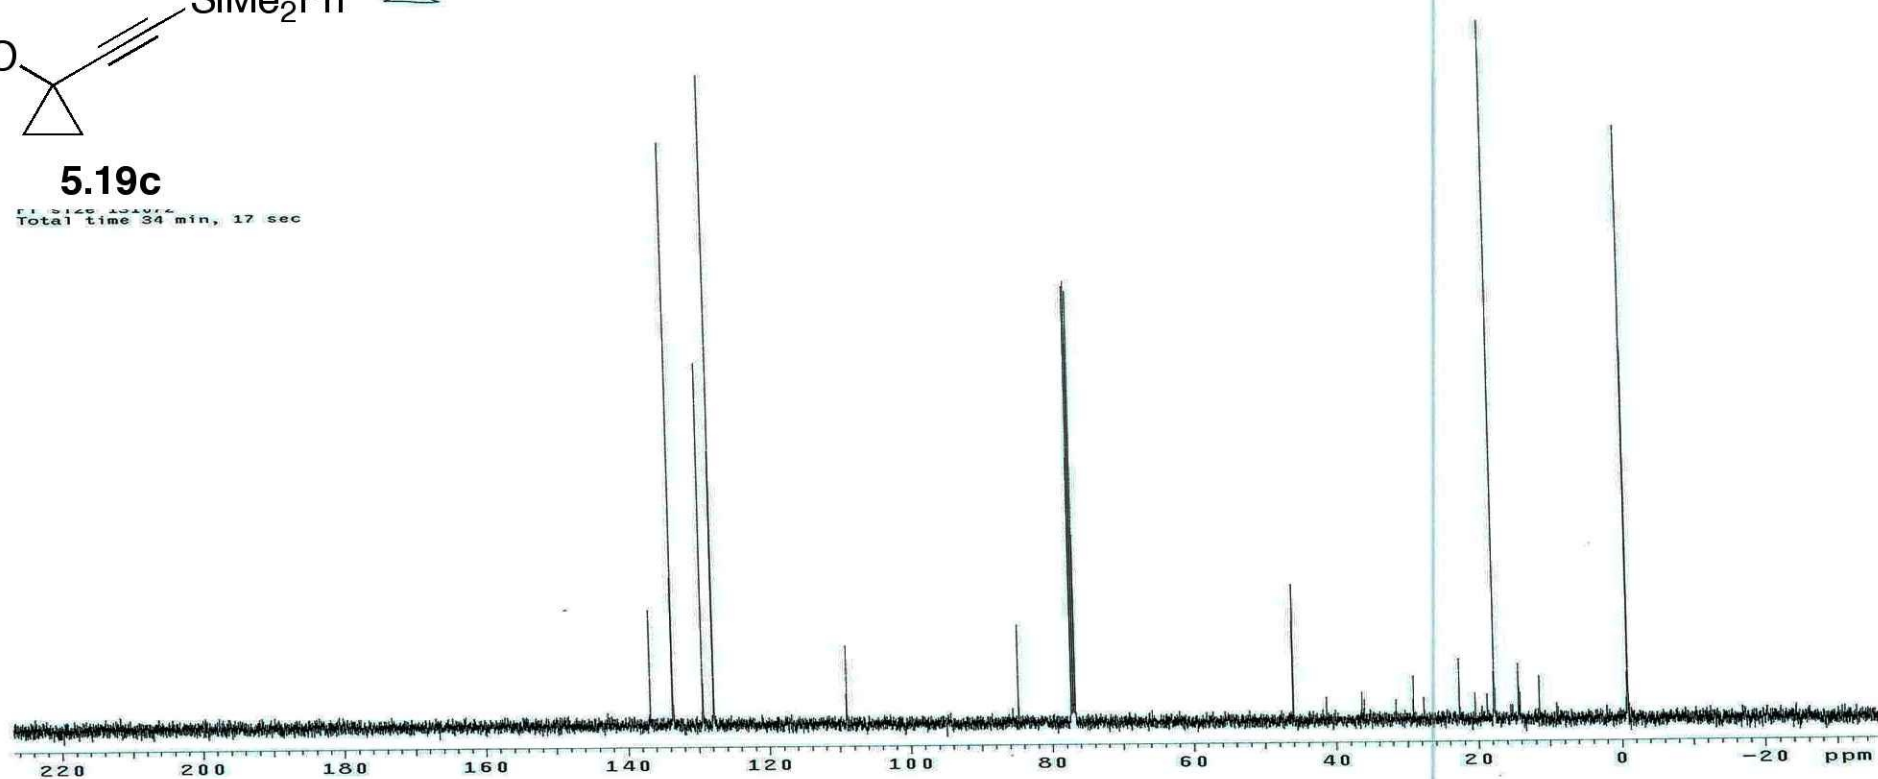

JX-XV-11  
 Pulse Sequence: s2pul  
 Solvent: CDCl<sub>3</sub>  
 Ambient temperature  
 INOVA-500 "ui500"  
 Pulse 60.0 degrees  
 Acq. time 4.000 sec  
 Width 8000.0 Hz  
 8 repetitions  
 OBSERVE H1, 499.7485737 MHz  
 DATA PROCESSING  
 FT size 131072  
 Total time 1 min, 4 sec

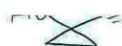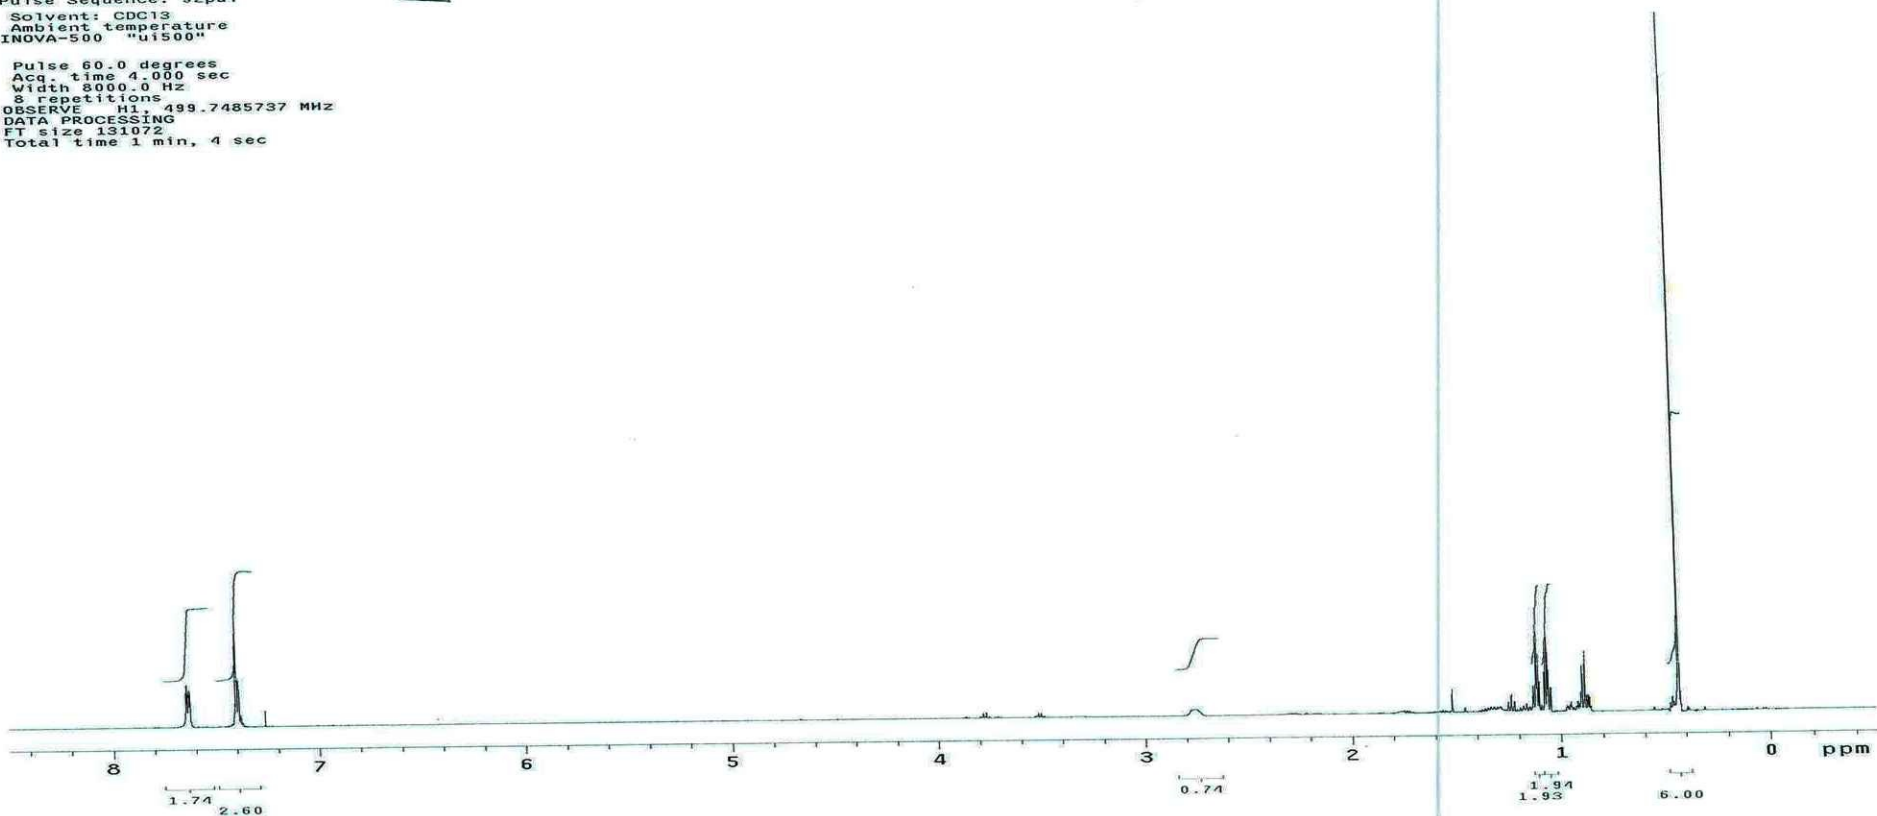

PERKIN ELMER

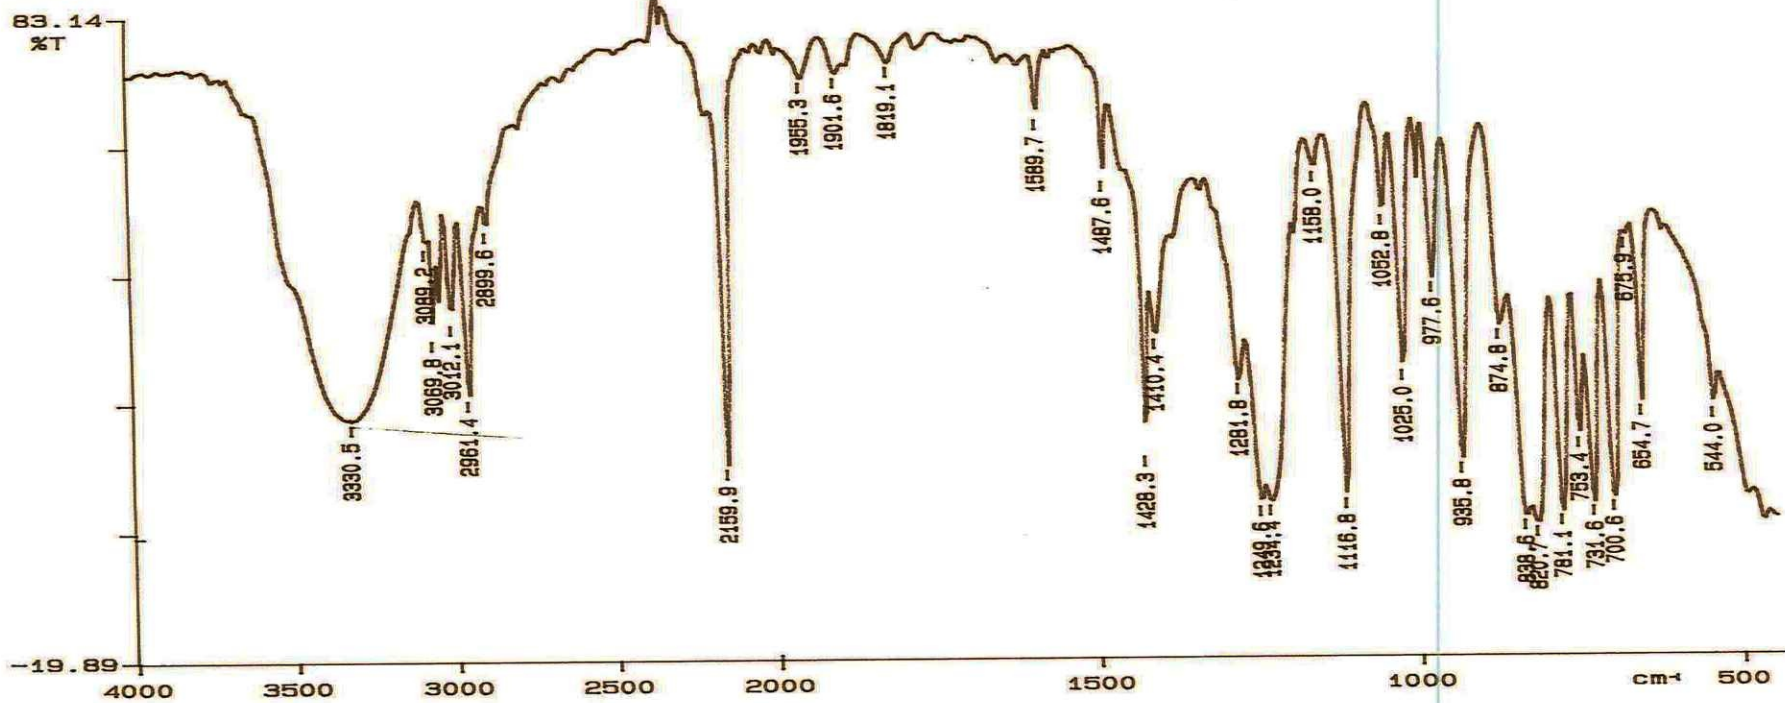

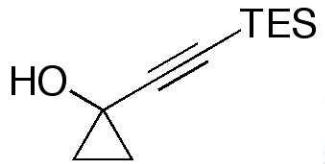

29 MHz  
05 MHz

5.19d

Total time 34 min, 17 sec

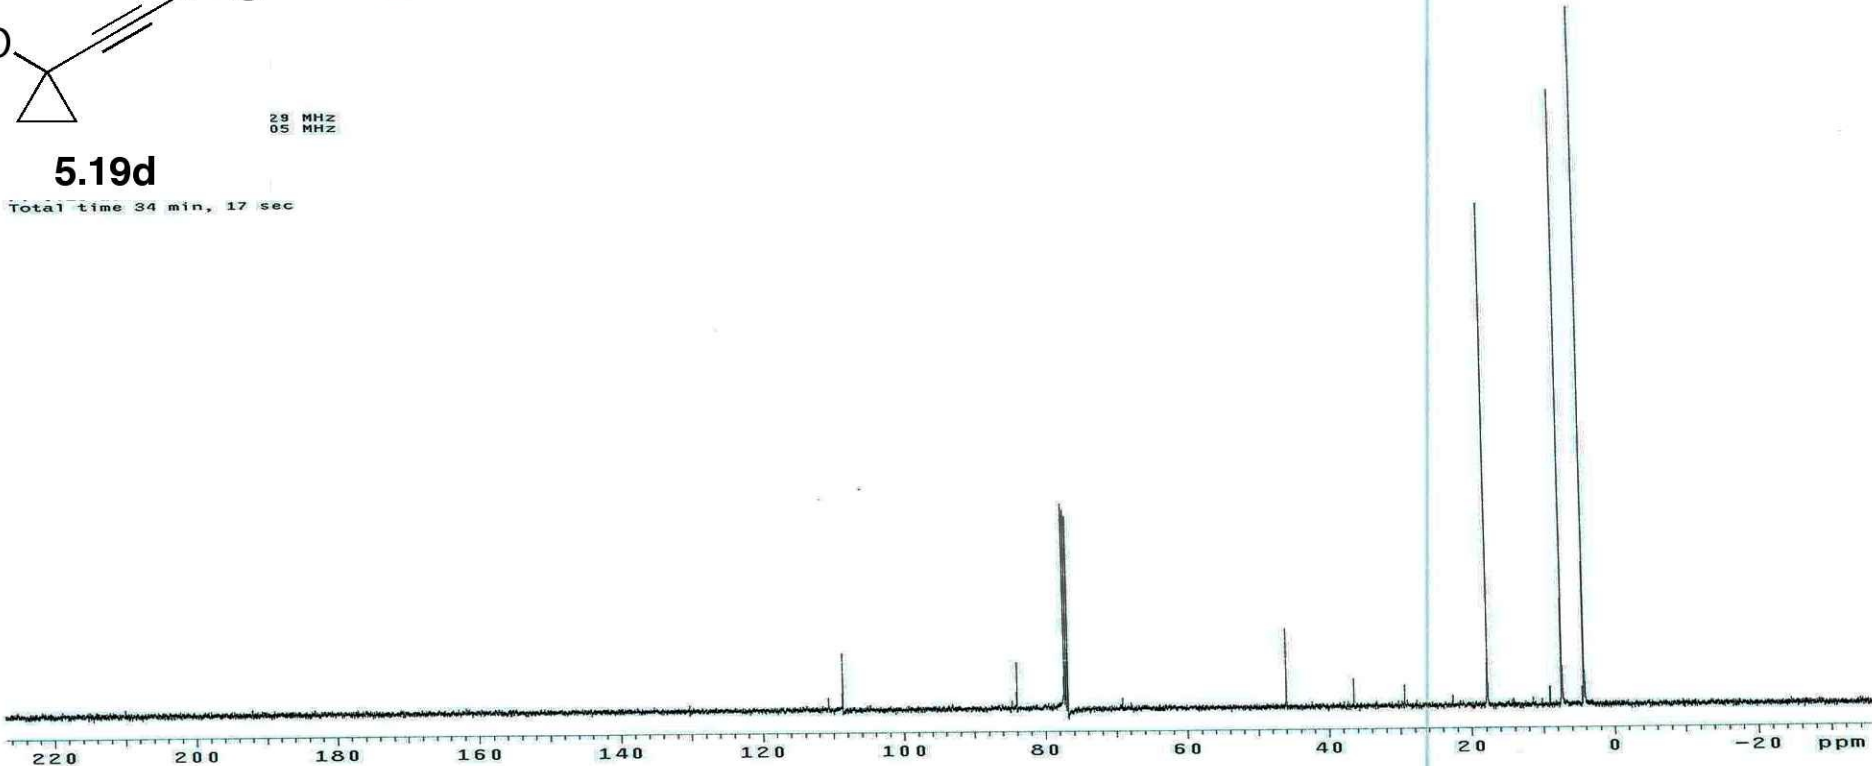

JX-XV-10  
Pulse Sequence: s2pu1  
Solvent: CDC13  
Ambient temperature  
INOVA-500 "uis00"  
Pulse 60.0 degrees  
Acq. time 4.000 sec  
Width 8000.0 Hz  
8 repetitions  
OBSERVE H1, 499.7485738 MHz  
DATA PROCESSING  
FT size 131072  
Total time 1 min, 4 sec

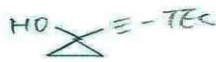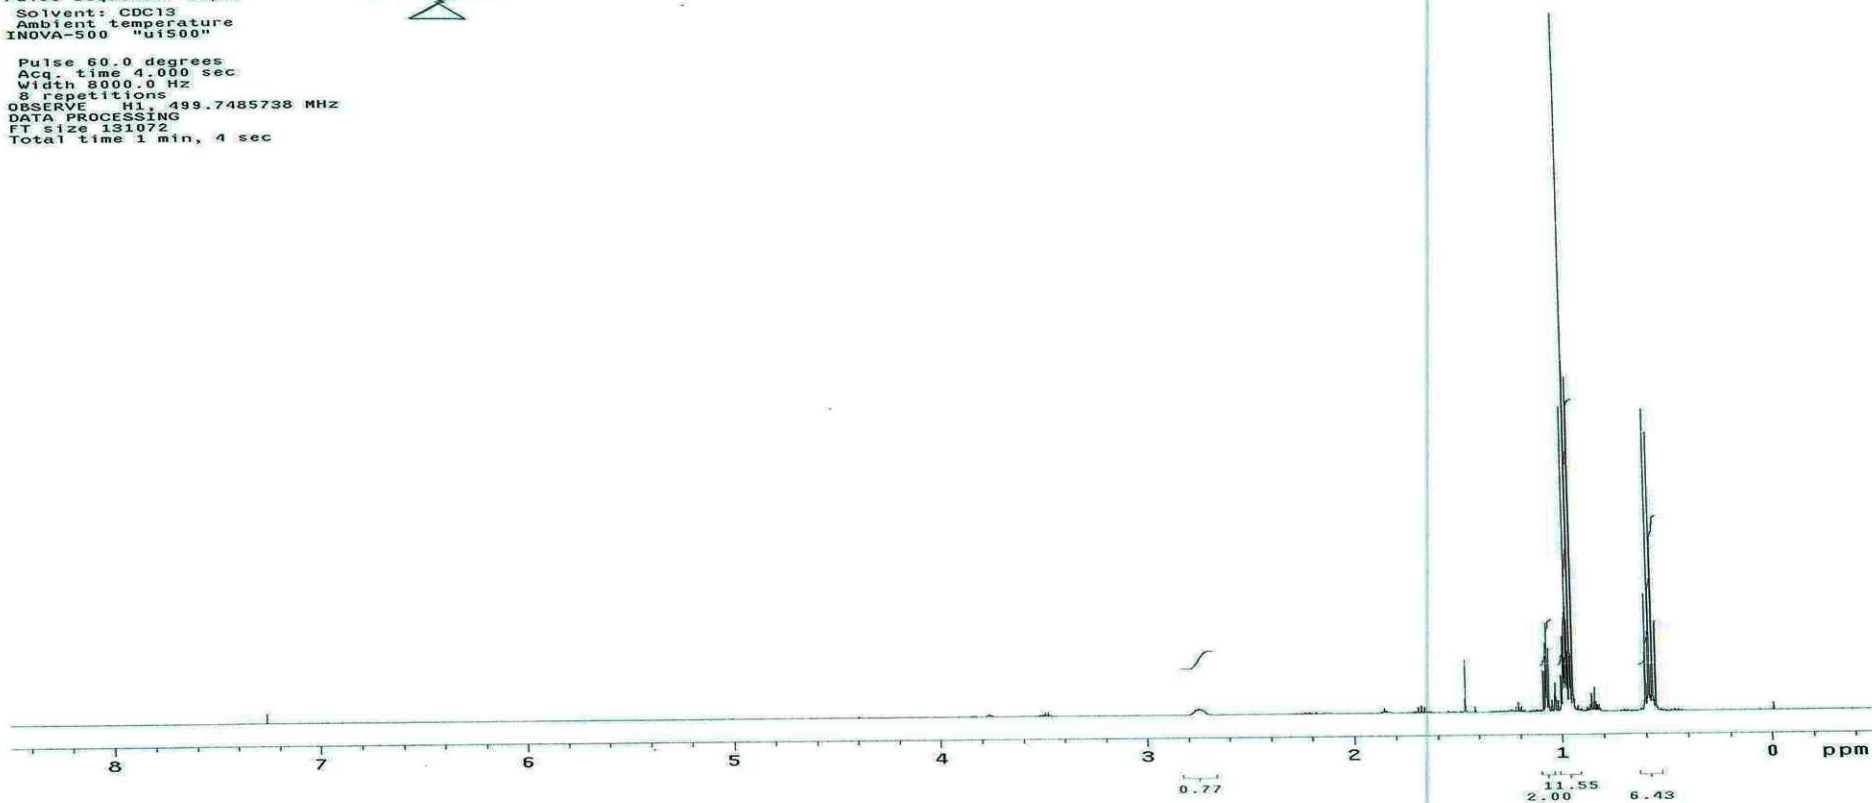

PERKIN ELMER

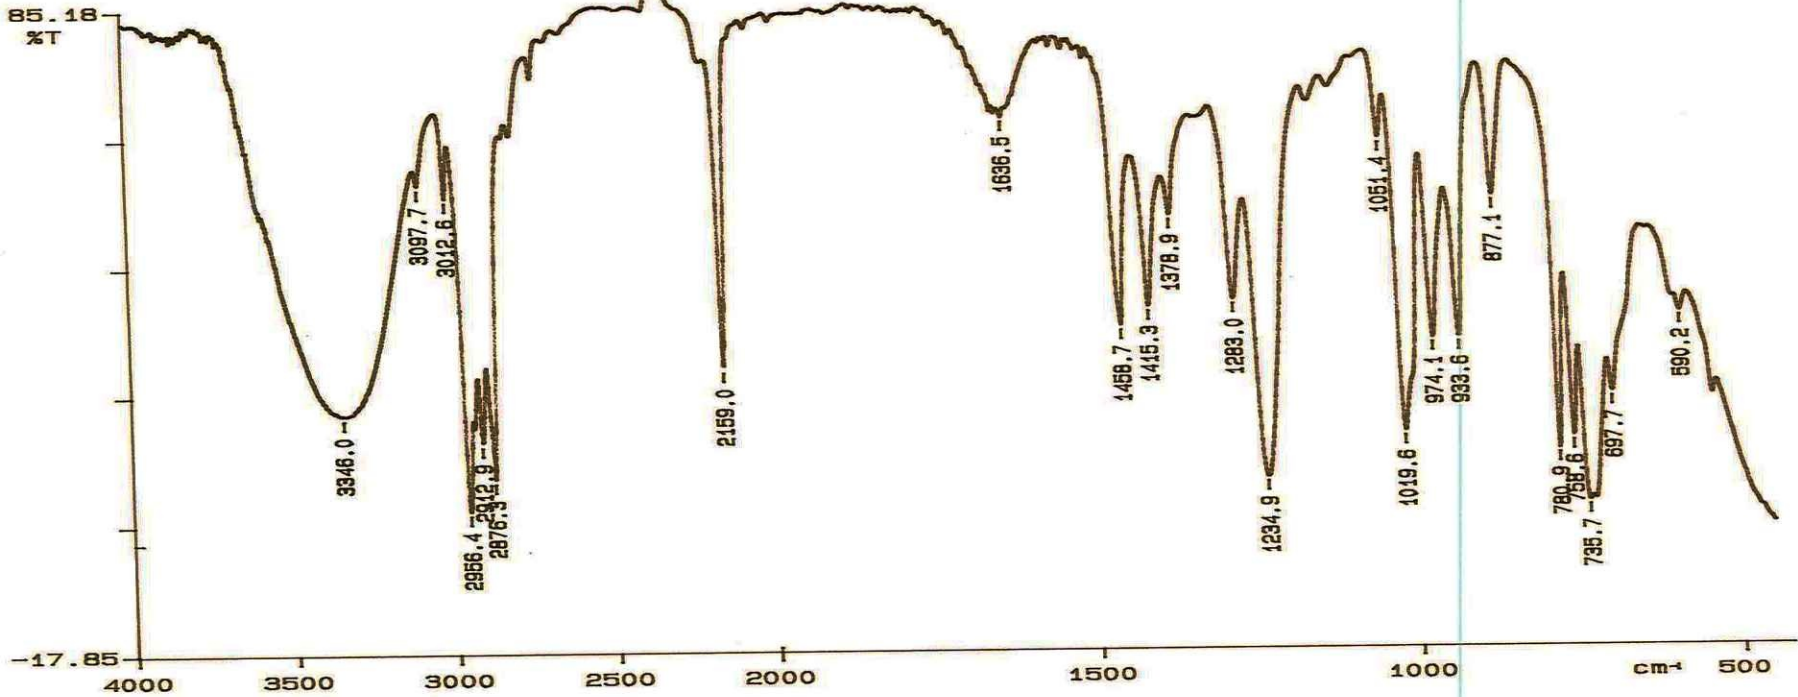

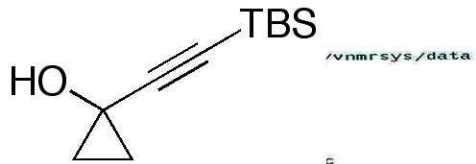

5.19e

849 MHz  
605 MHz  
Power 42 dB  
continuously on  
WALTZ-16 modulated  
DATA PROCESSING  
Line broadening 2.0 Hz  
FT size 131072  
Total time 34 min

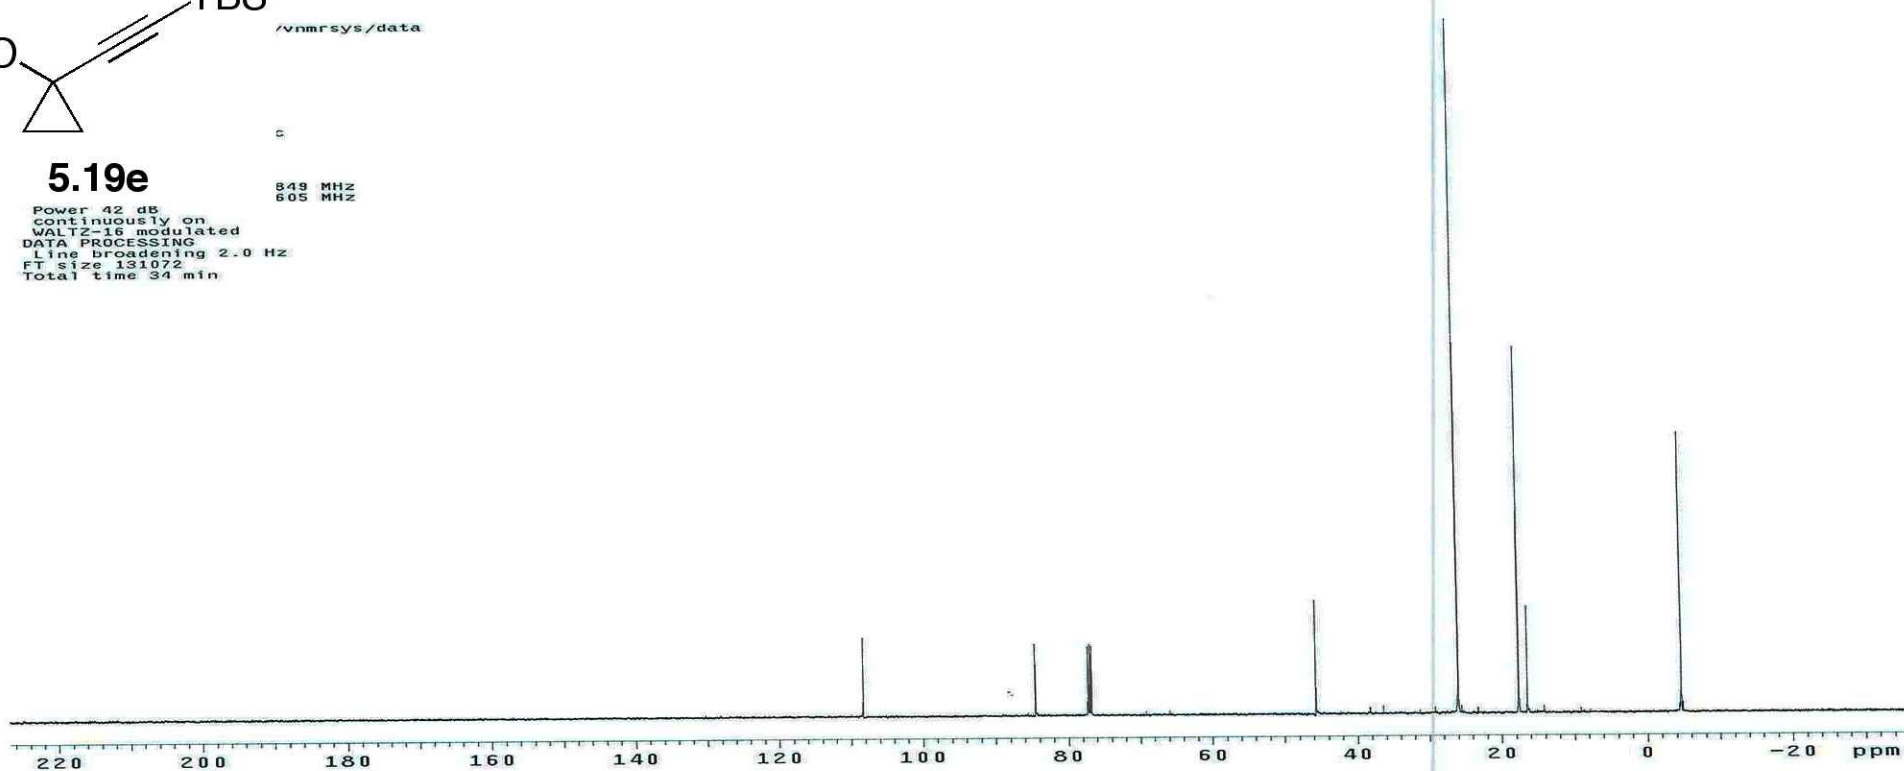

JX-XV-24  
Data Collected on: nmr1-inova500  
Archive directory: /export/home/jiaxie/vnmrsys/data  
Sample directory:  
File: JX-XV-24-H  
Pulse Sequence: s2pu1  
Solvent: CDCl3

Pulse 60.0 degrees  
Acq. time 4.000 sec  
Width 8000.0 Hz  
4 repetitions  
OBSERVE H1 499.7485737 MHz  
DATA PROCESSING  
FT size 131072  
Total time 1 min

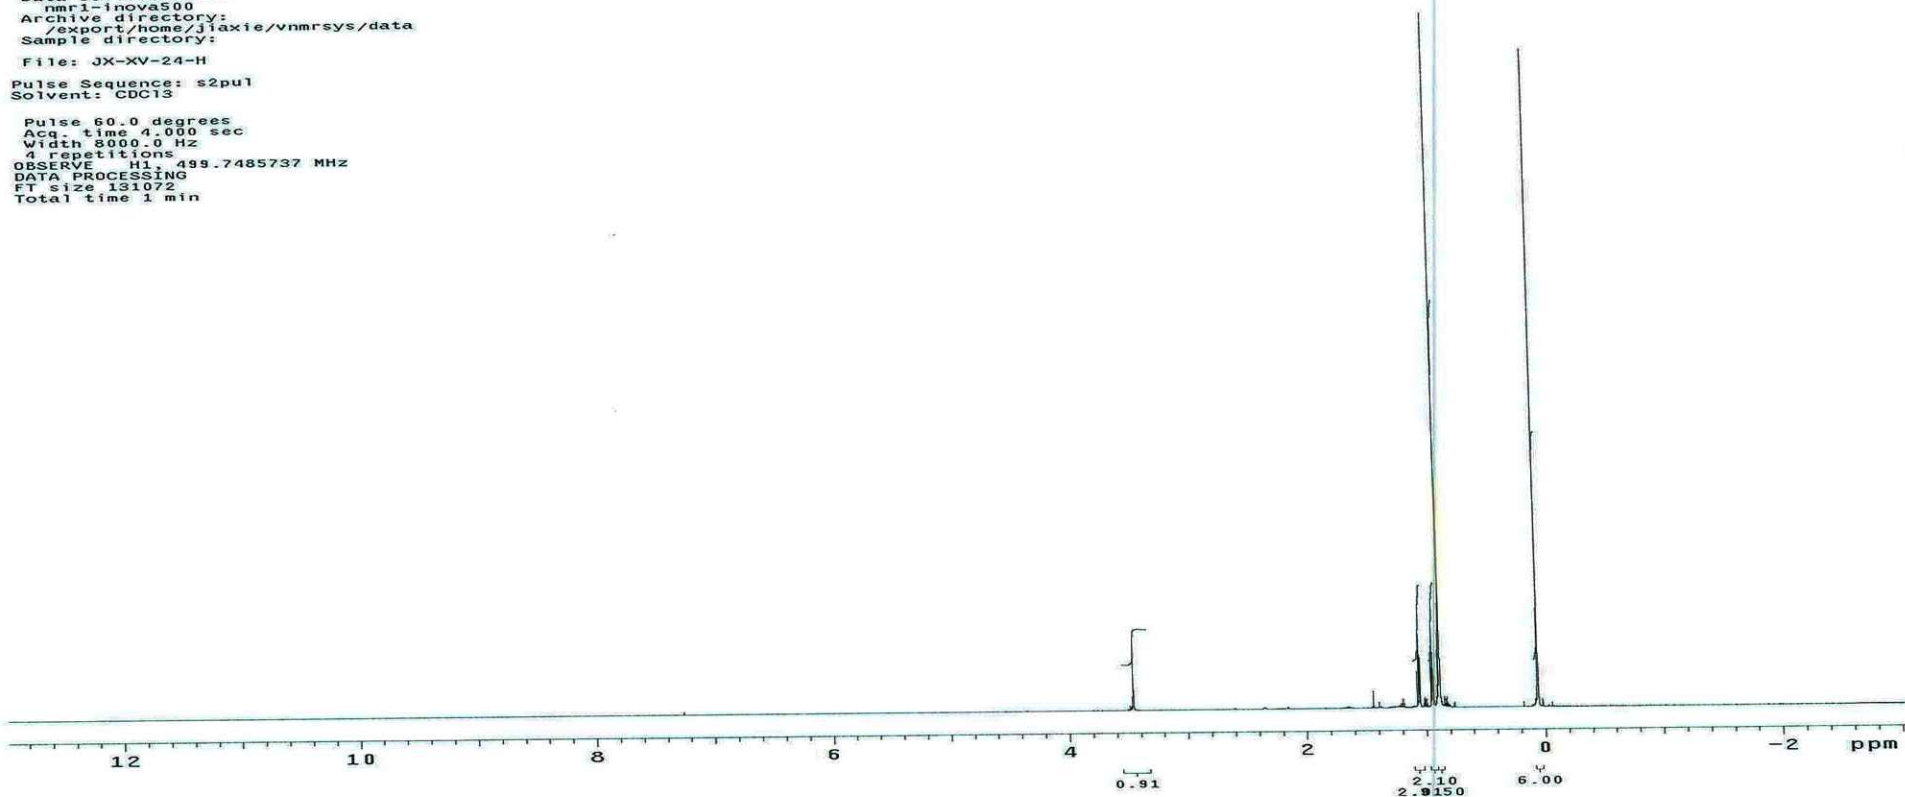

PERKIN ELMER

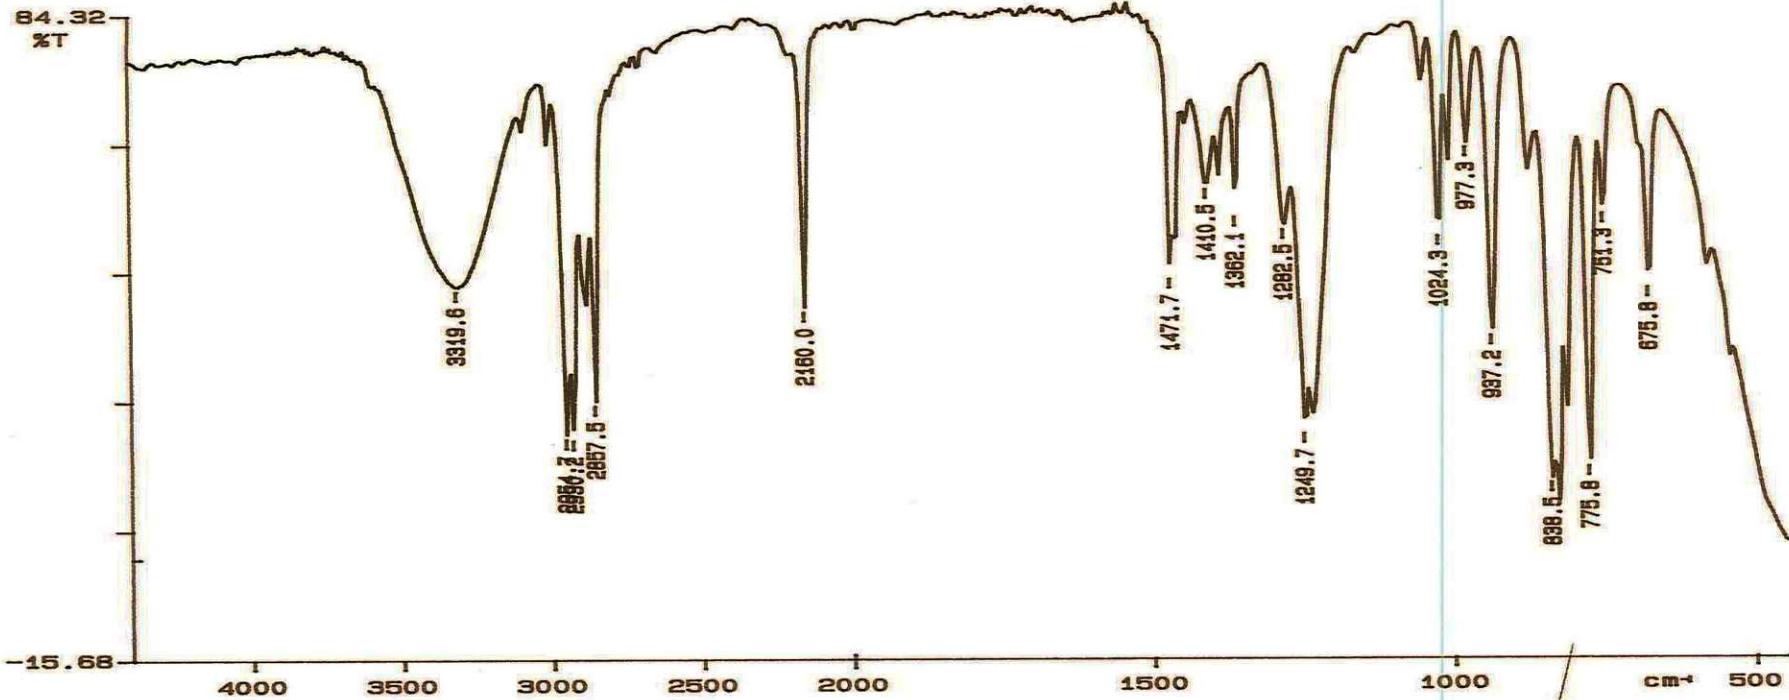



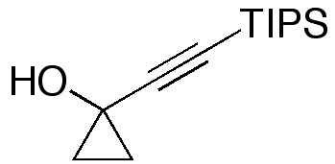

5.19g

Total time 34 min, 17 sec

MHZ

MHZ

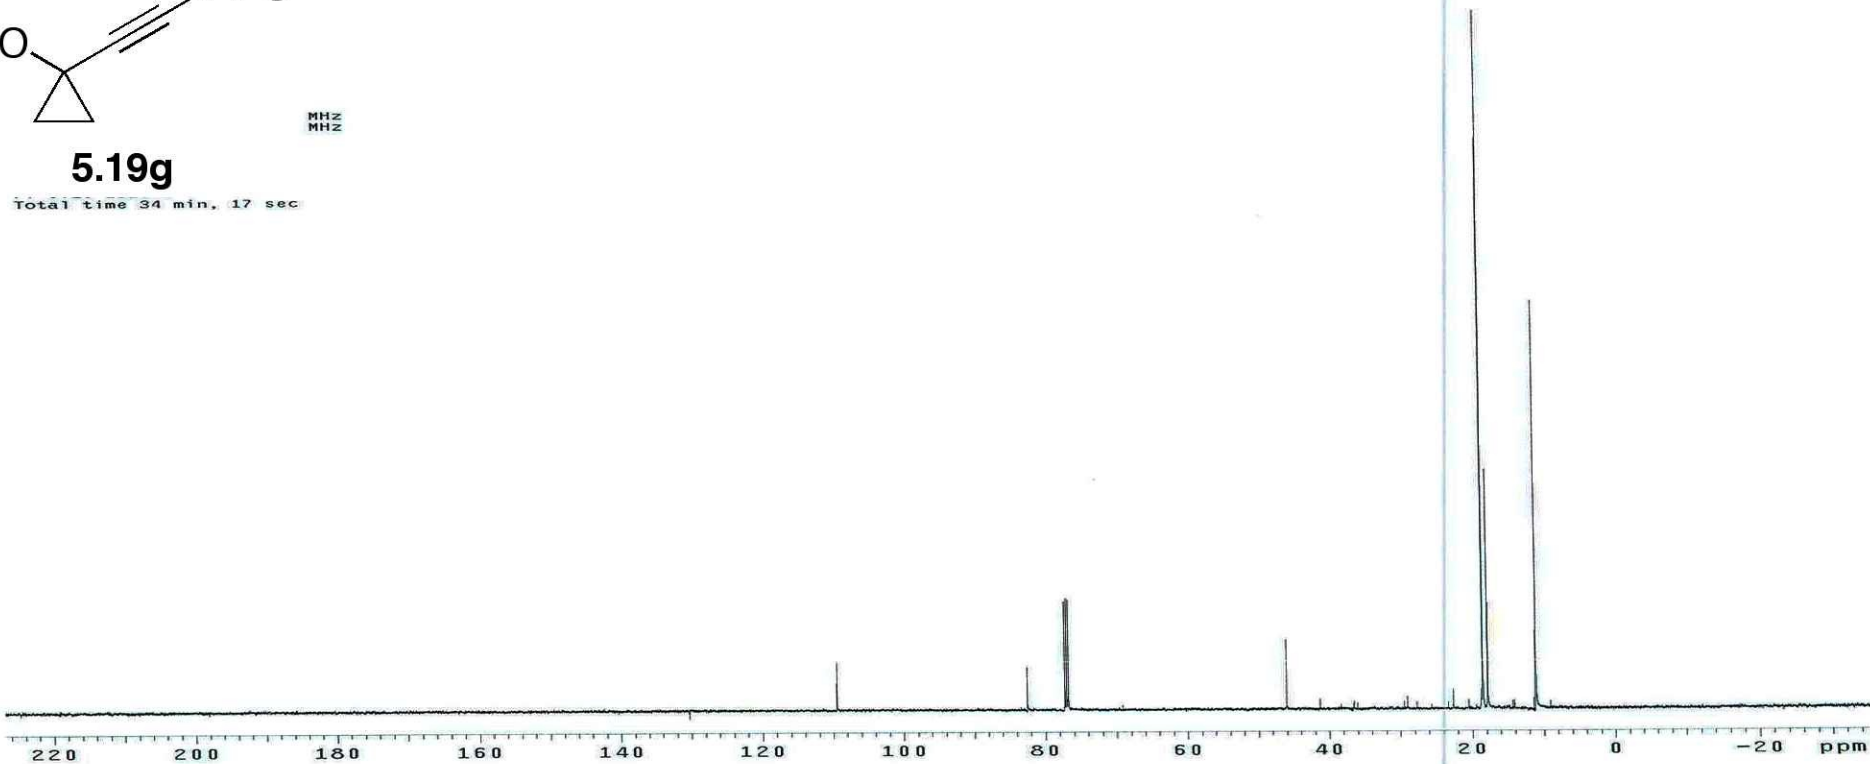

JX-XV-14  
 Pulse Sequence: s2pul  
 Solvent: CDCl3  
 Ambient temperature  
 INOVA-500 "uis500"  
 Pulse 60.0 degrees  
 Acq. time 4.000 sec  
 Width 8000.0 Hz  
 8 repetitions  
 OBSERVE H1, 499.7485737 MHz  
 DATA PROCESSING  
 FT size 131072  
 Total time 1 min, 4 sec

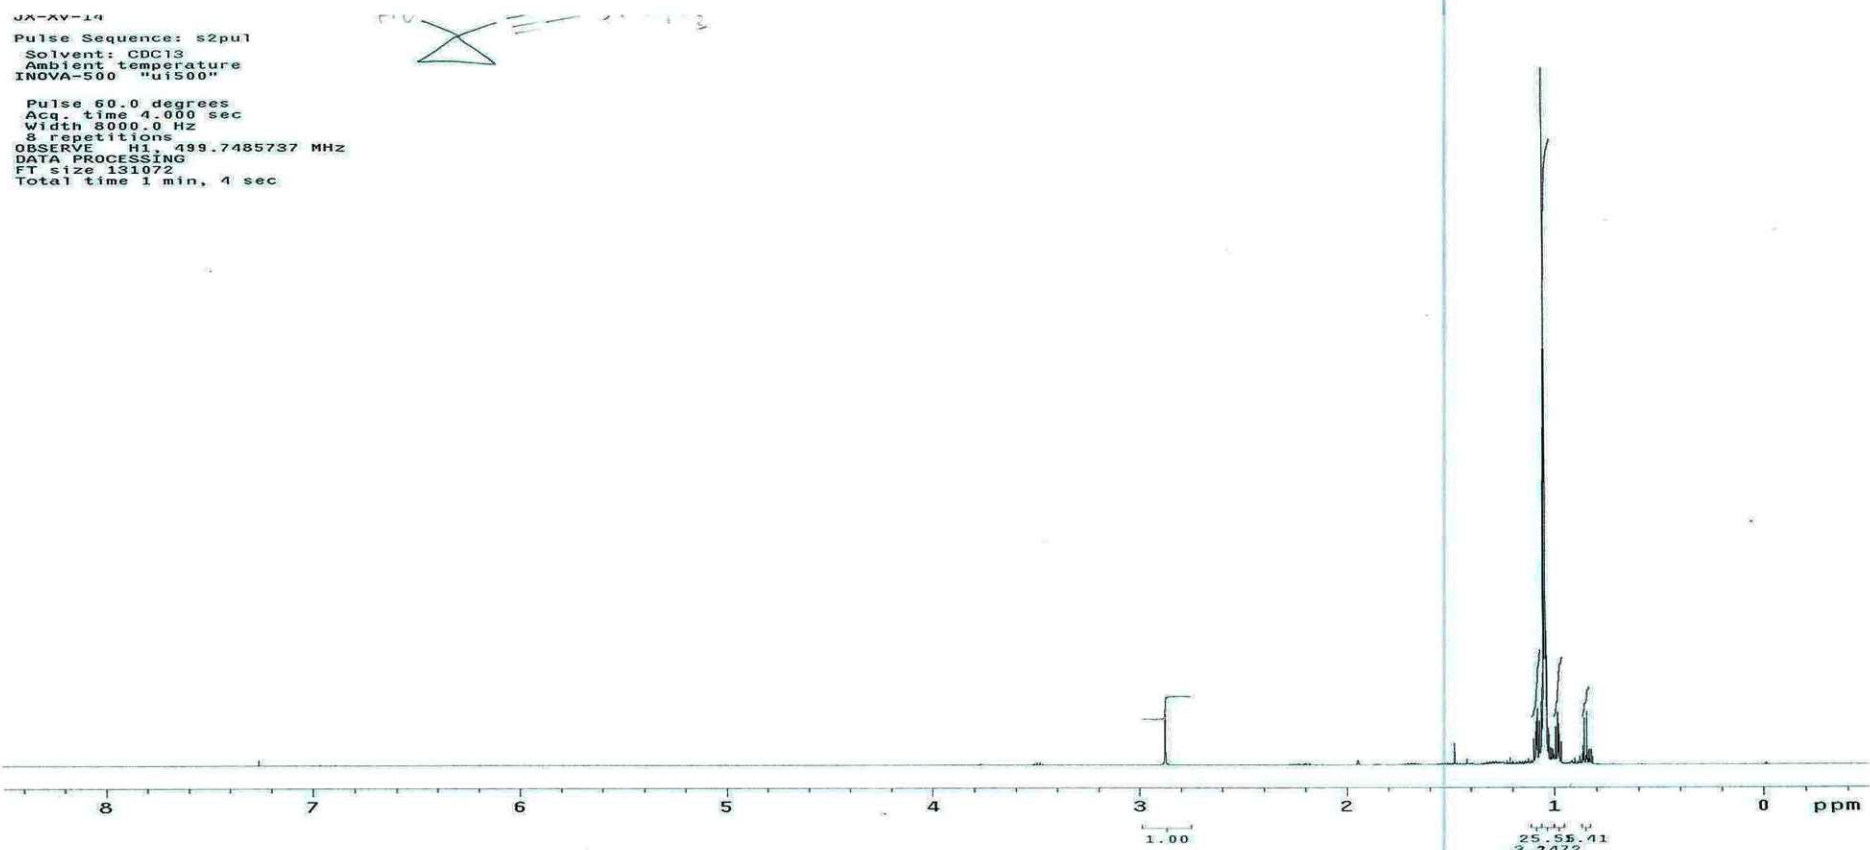

PERKIN ELMER

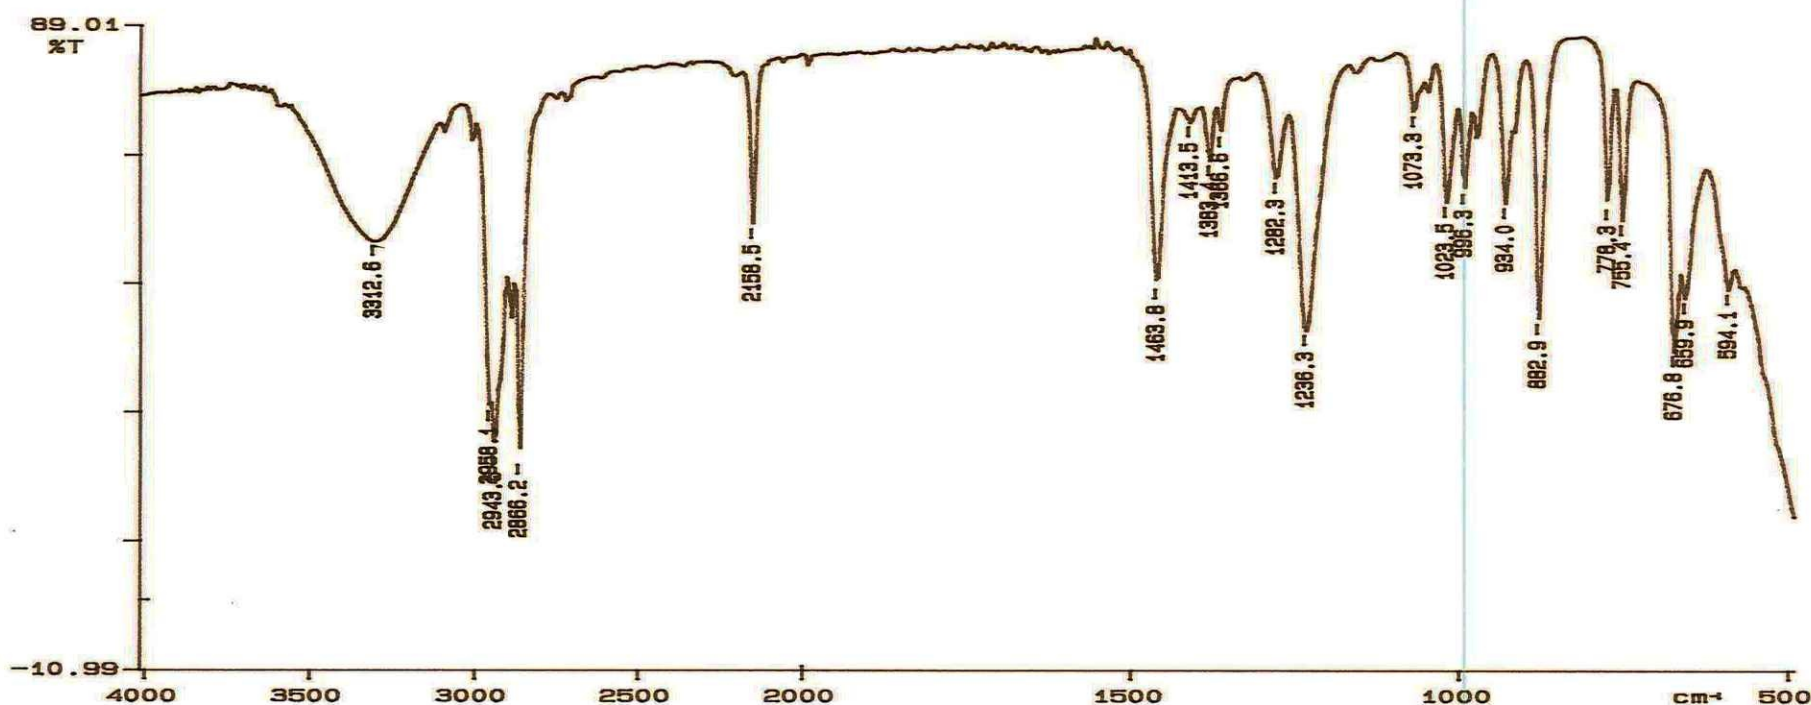

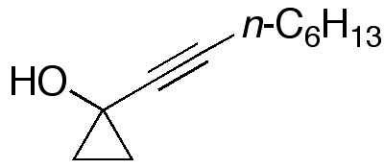

5.20a

TOTAL TIME 34 MIN, 27 SEC

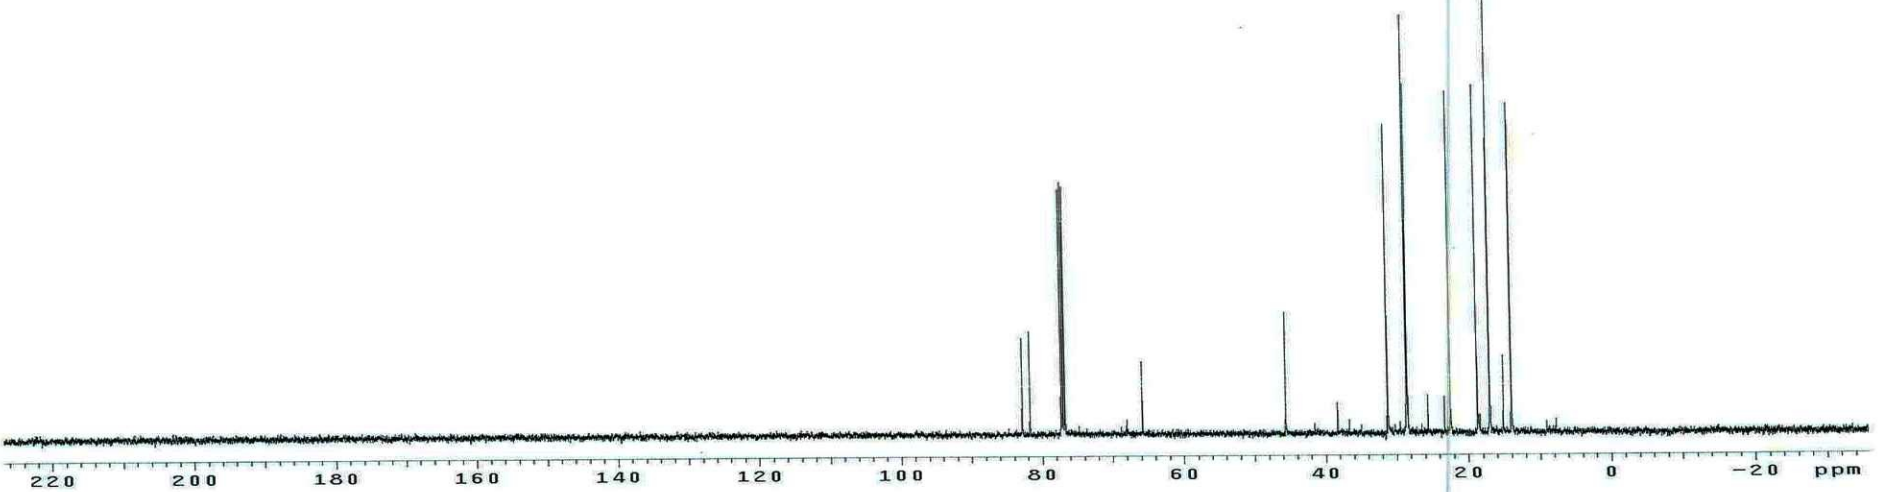

Pulse Sequence: s2pu1  
 Solvent: CDCl3  
 Ambient temperature  
 INOVA-500 "u1500"  
 Pulse 60.0 degrees  
 Acq. time 4.000 sec  
 Width 8000.0 Hz  
 8 repetitions  
 OBSERVE H1, 499.7485738 MHz  
 DATA PROCESSING  
 FT size 131072  
 Total time 1 min, 4 sec

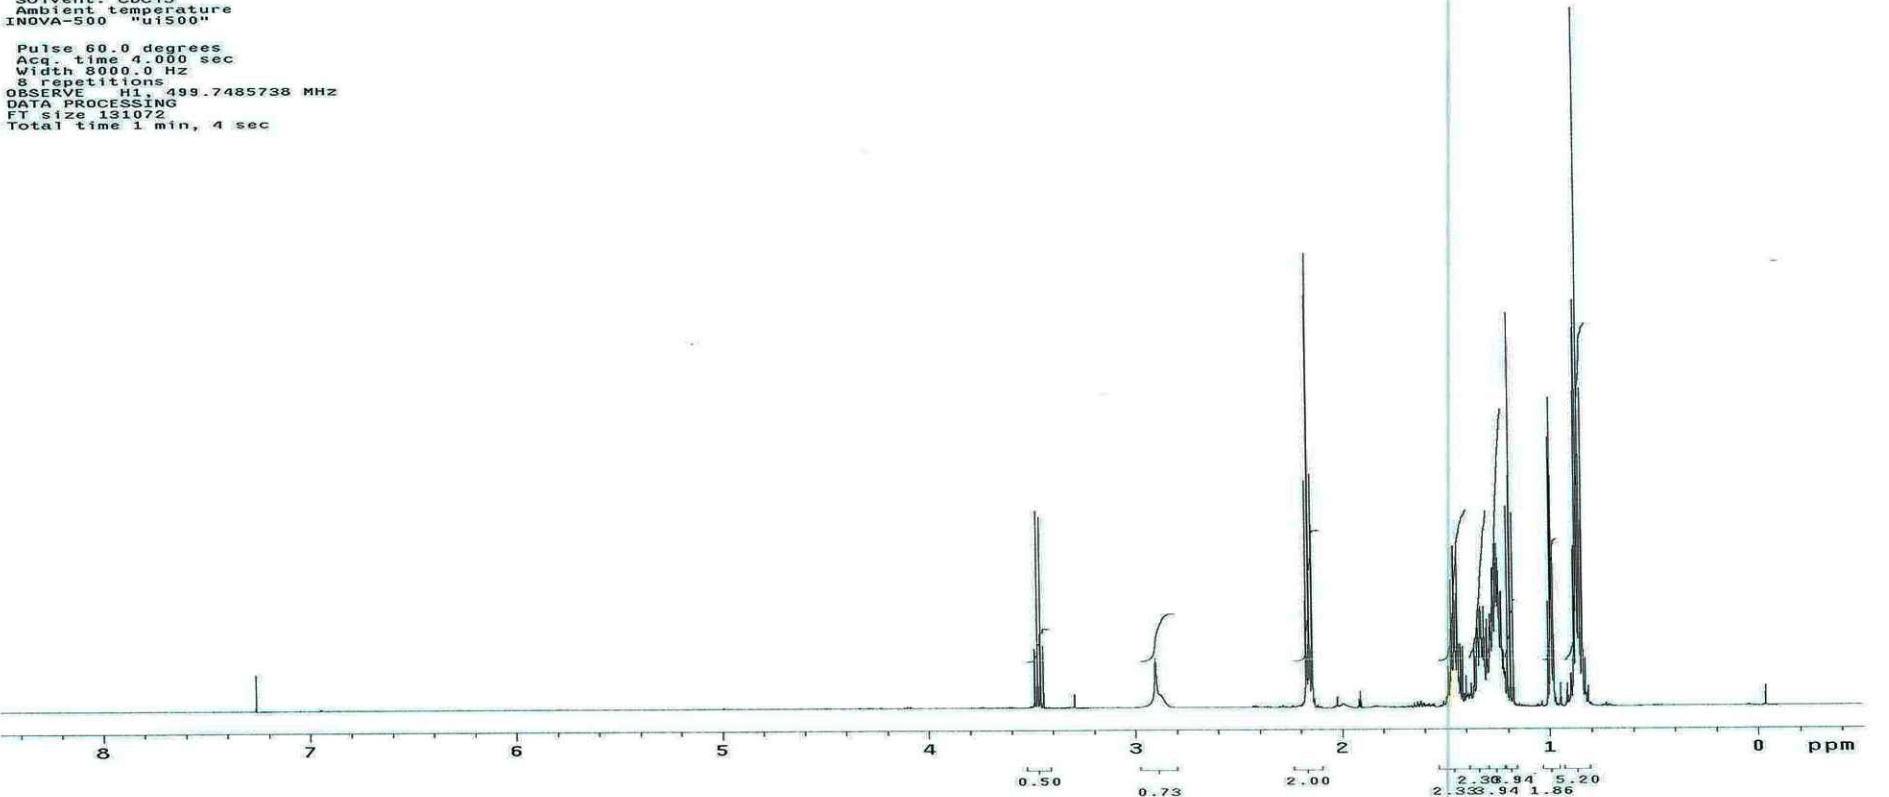

PERKIN ELMER

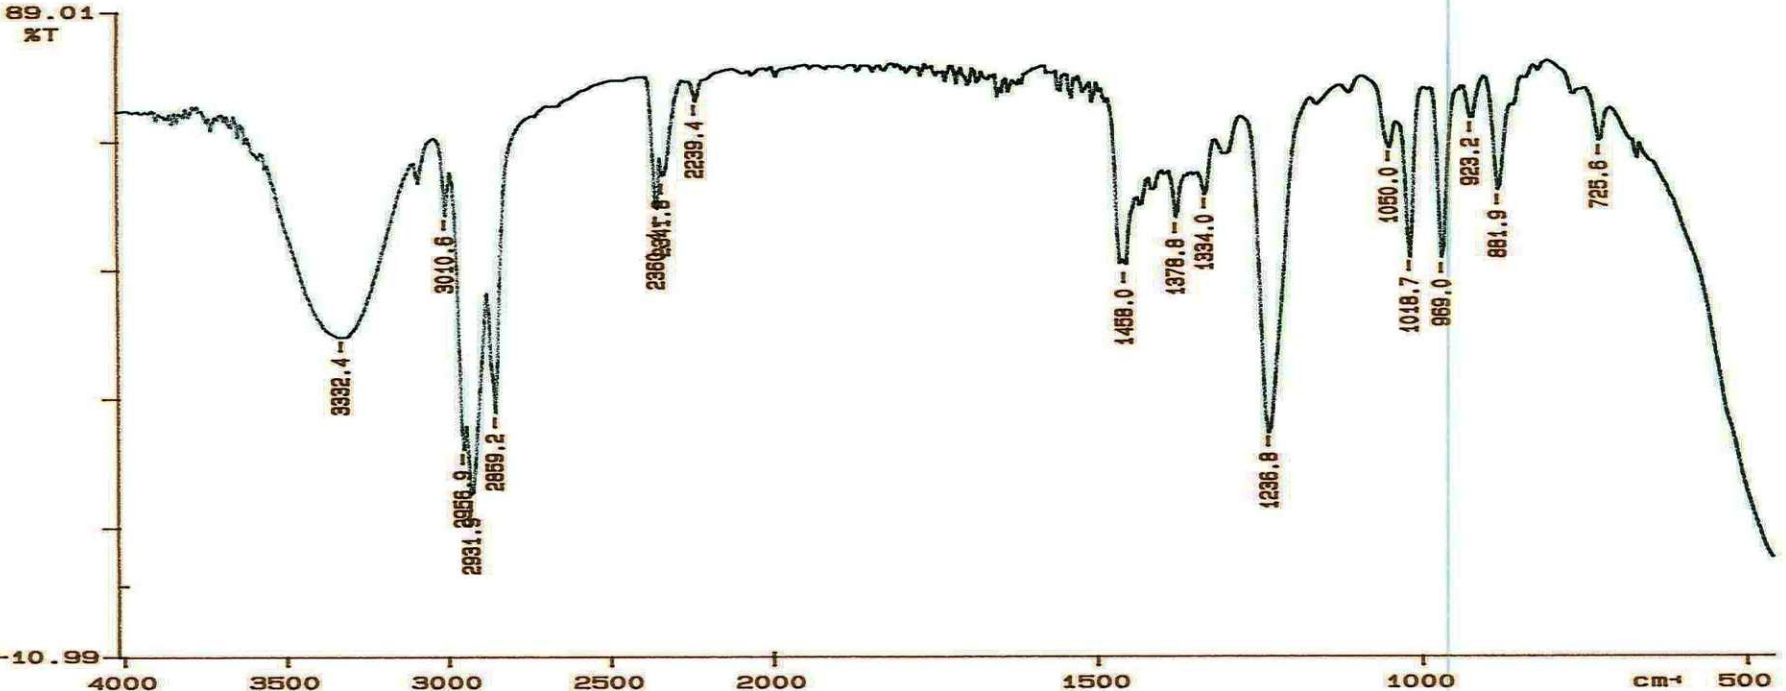

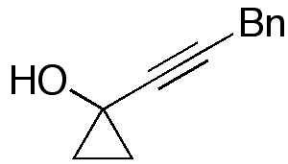

5.20b

| M     | HEIGHT |
|-------|--------|
| 6.531 | 26.2   |
| 8.356 | 114.4  |
| 7.715 | 151.2  |
| 6.485 | 24.0   |
| 6.449 | 68.6   |
| 1.949 | 26.6   |
| 1.006 | 27.0   |
| 1.252 | 29.8   |
| 1.000 | 31.0   |
| 1.744 | 30.1   |
| 1.525 | 36.4   |
| 1.951 | 65.5   |
| 1.956 | 127.2  |

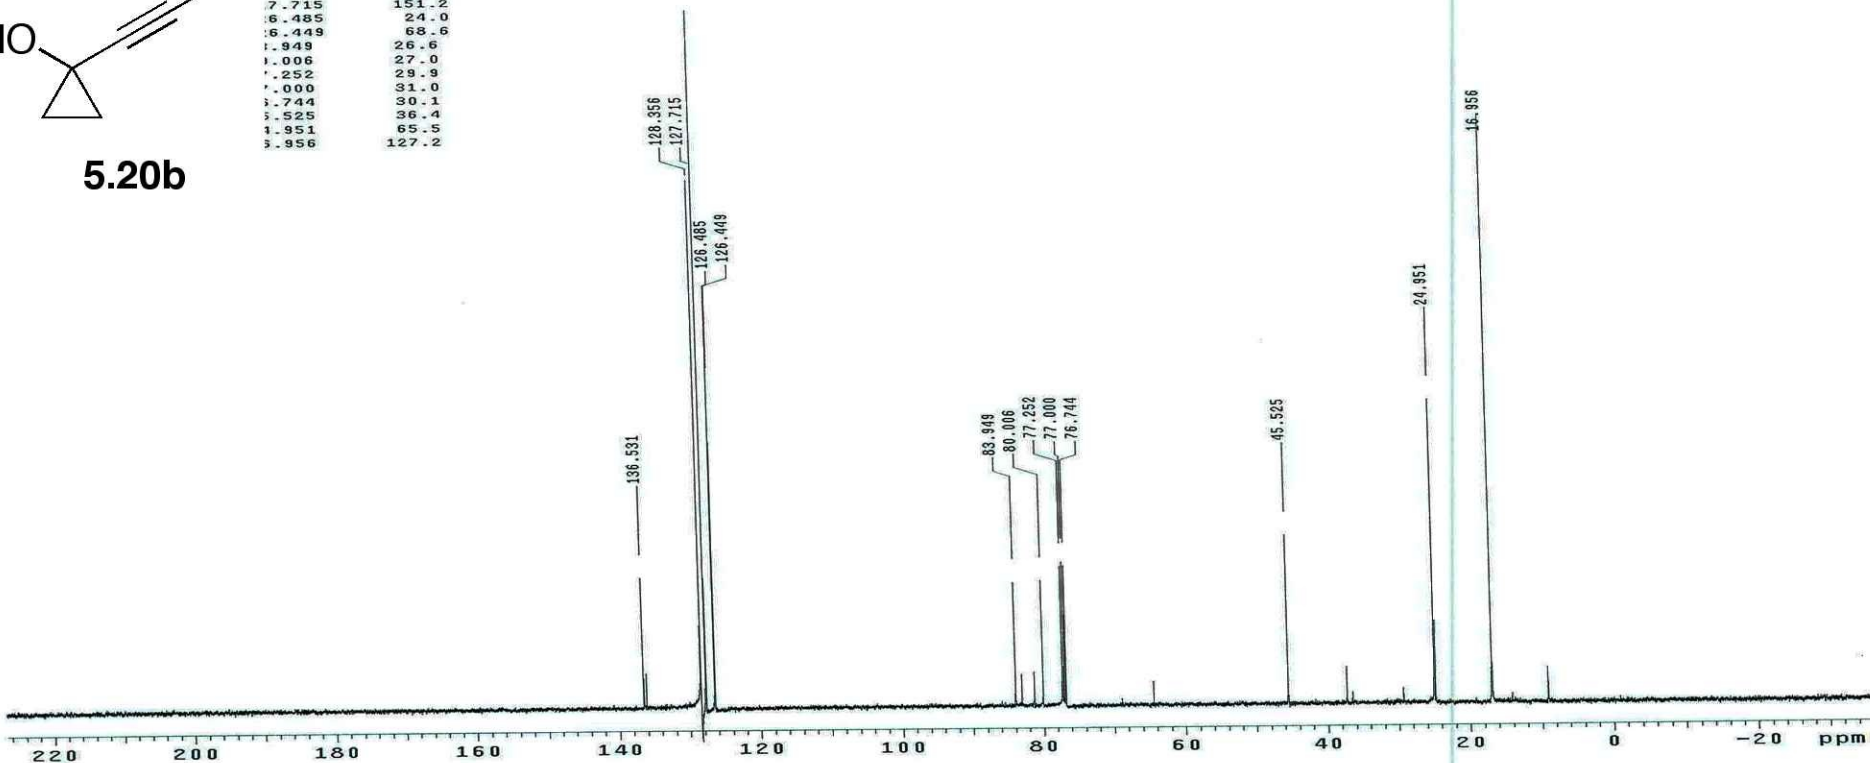

JX-XV-72  
Pulse Sequence: s2pu1  
Solvent: CDCl3  
Ambient temperature  
INOVA-500 "u1500"  
Pulse 60.0 degrees  
Acq. time 4.000 sec  
Width 8000.0 Hz  
3 repetitions  
OBSERVE H1, 499.7486100 MHz  
DATA PROCESSING  
FT size 131072  
Total time 1 min, 4 sec

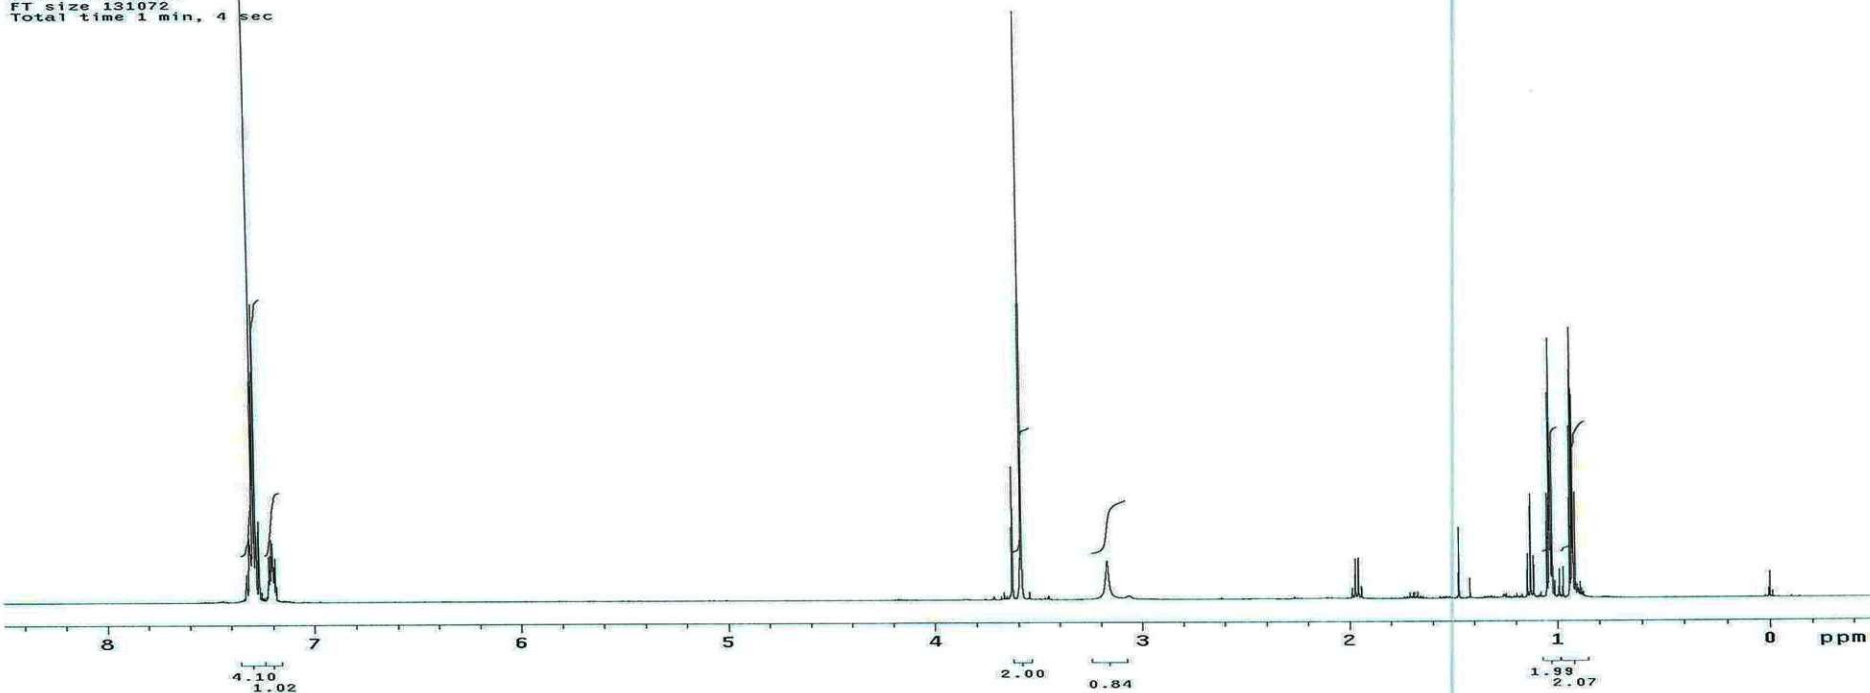

PERKIN ELMER

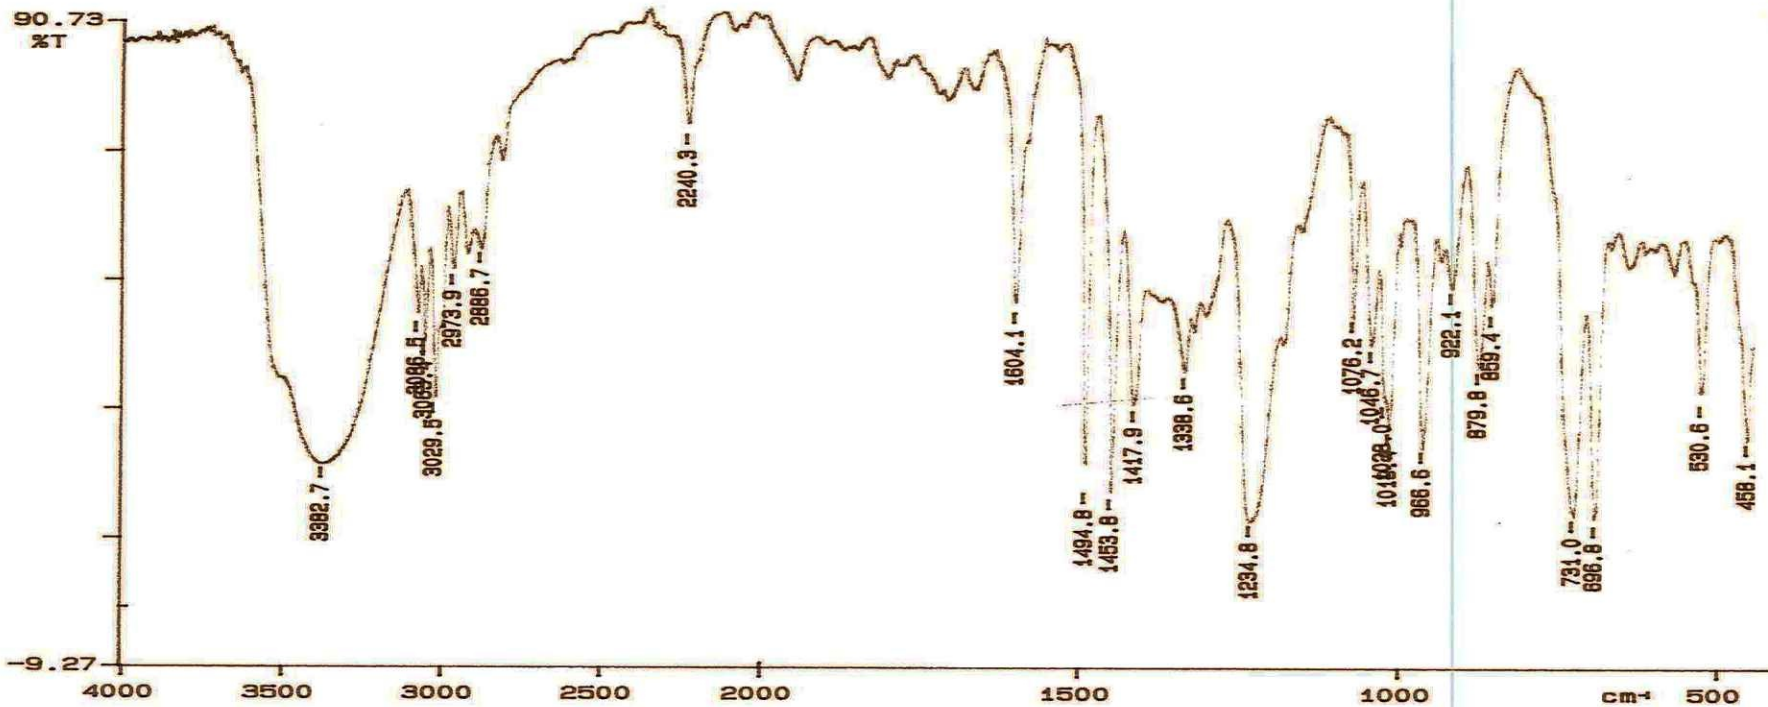



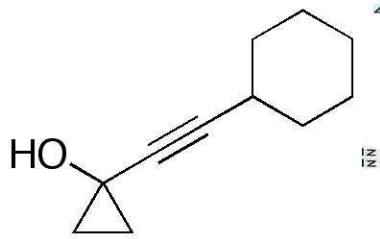

5.20c

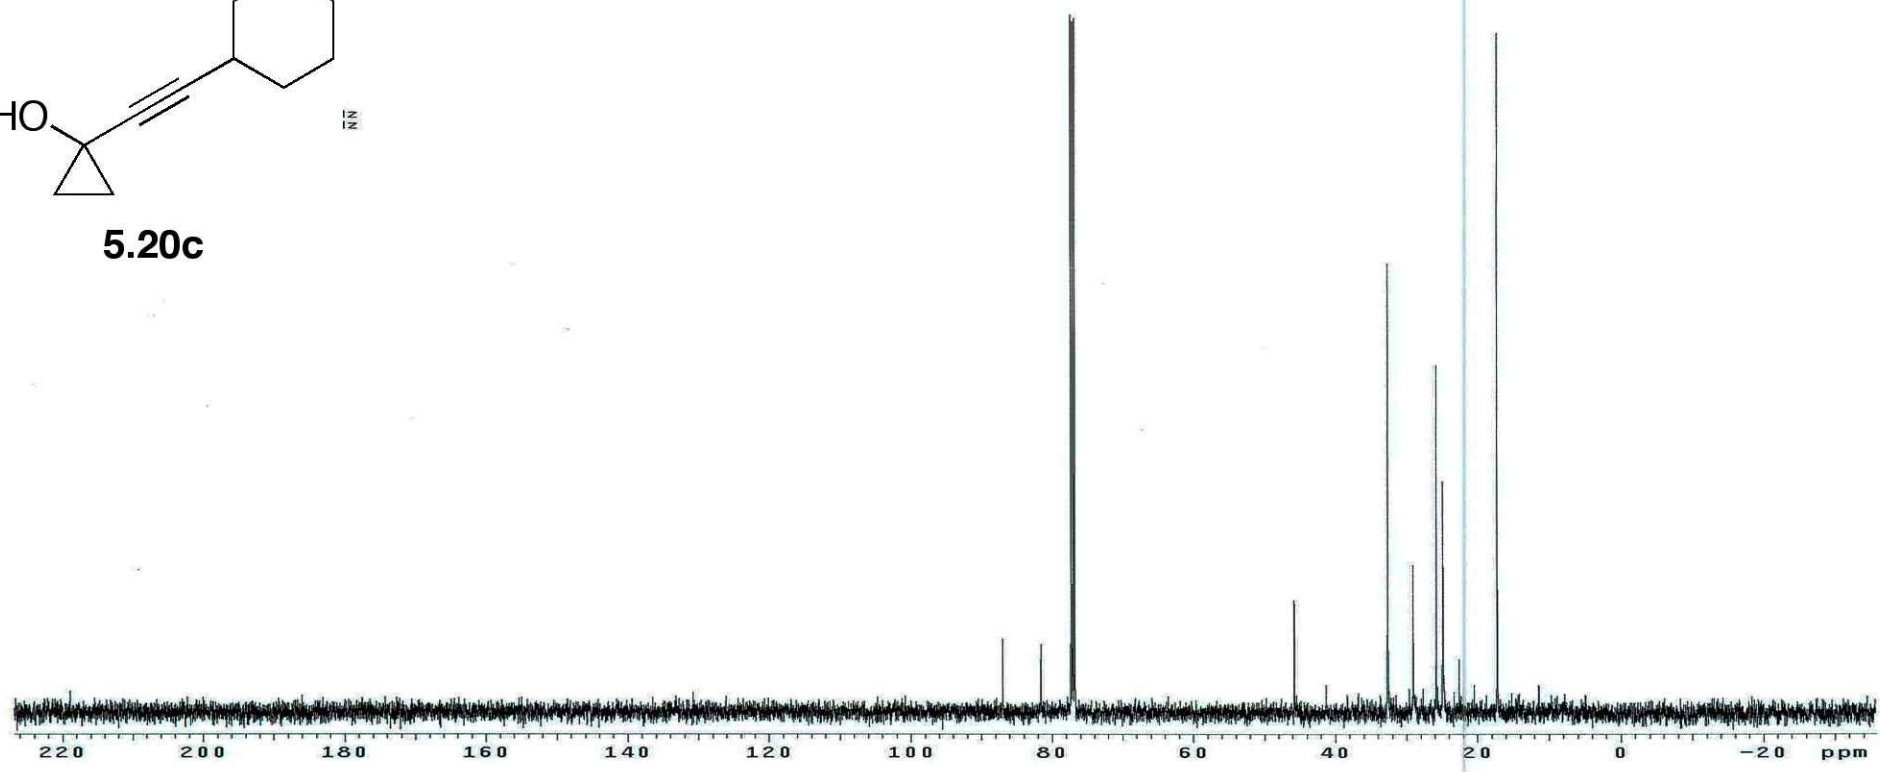

JX-XV-36  
 Pulse Sequence: s2pul  
 Solvent: CDCl3  
 Ambient temperature  
 INOVA-500 "ui500"  
 Pulse 60.0 degrees  
 Acq. time 4.000 sec  
 Width 8000.0 Hz  
 Single scan  
 OBSERVE H1, 499.7485738 MHz  
 DATA PROCESSING  
 FT size 131072  
 Total time 0 min, 4 sec

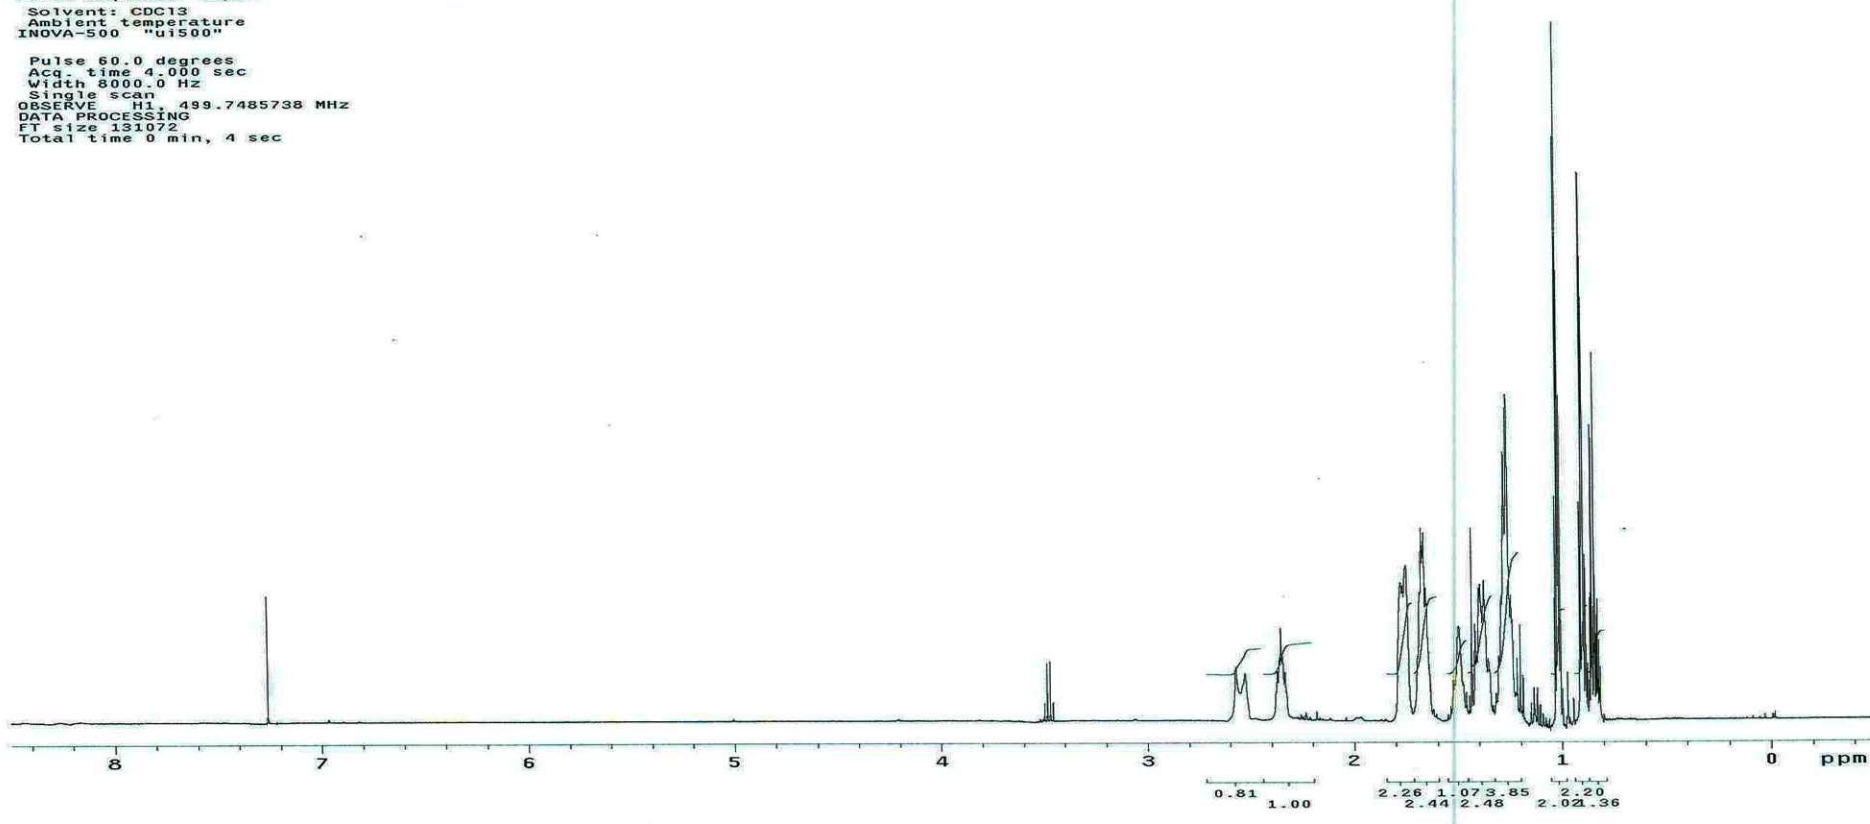

PERKIN ELMER

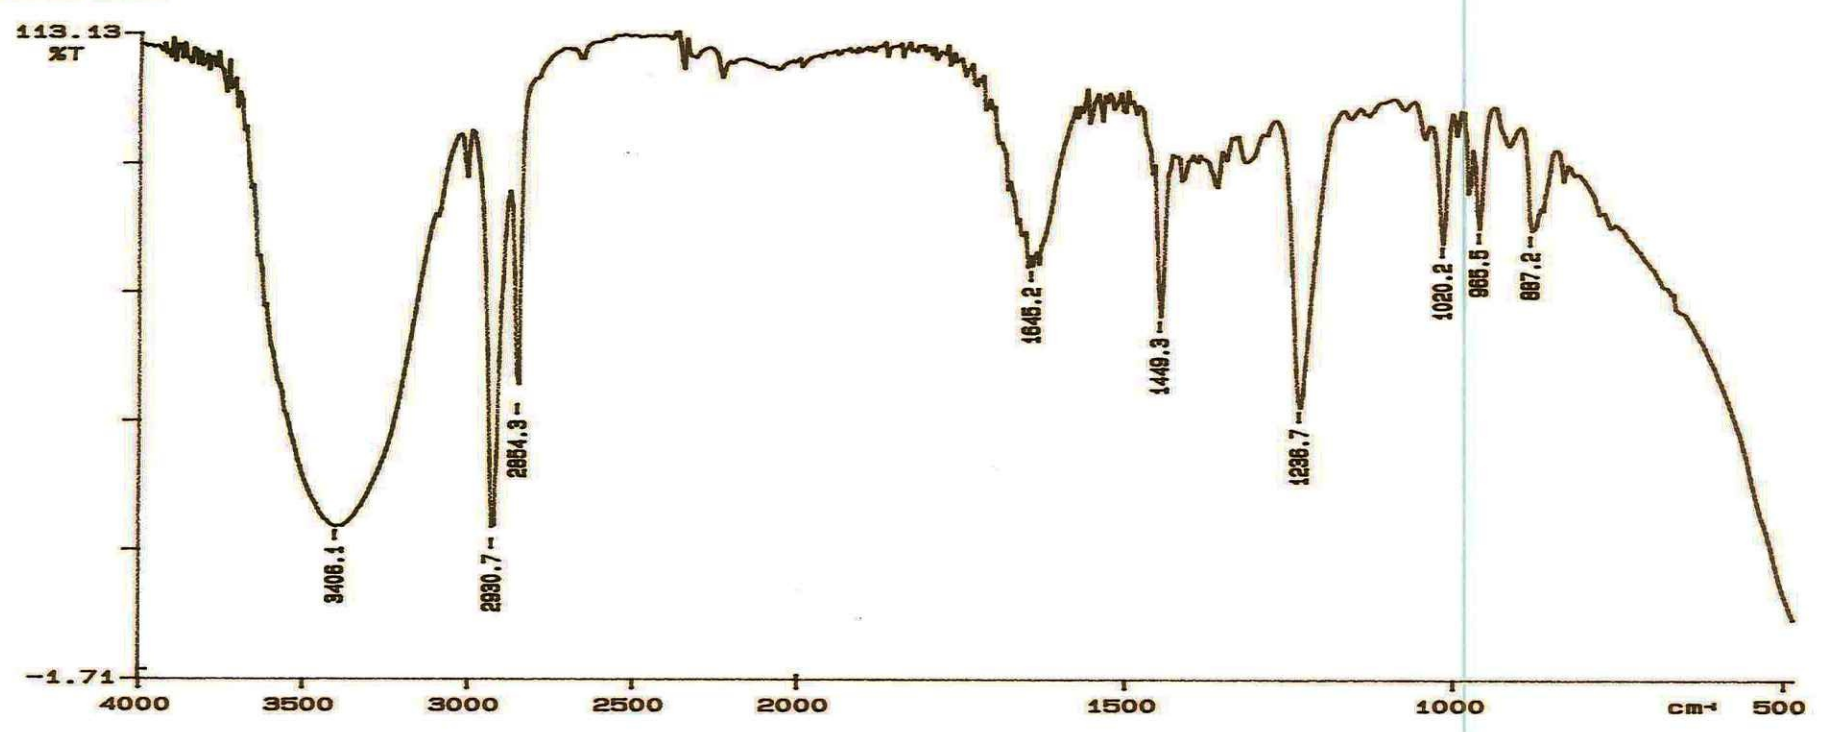

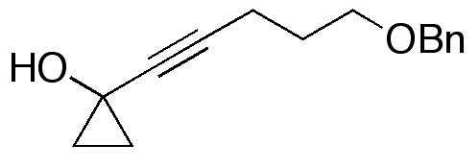

5.20d

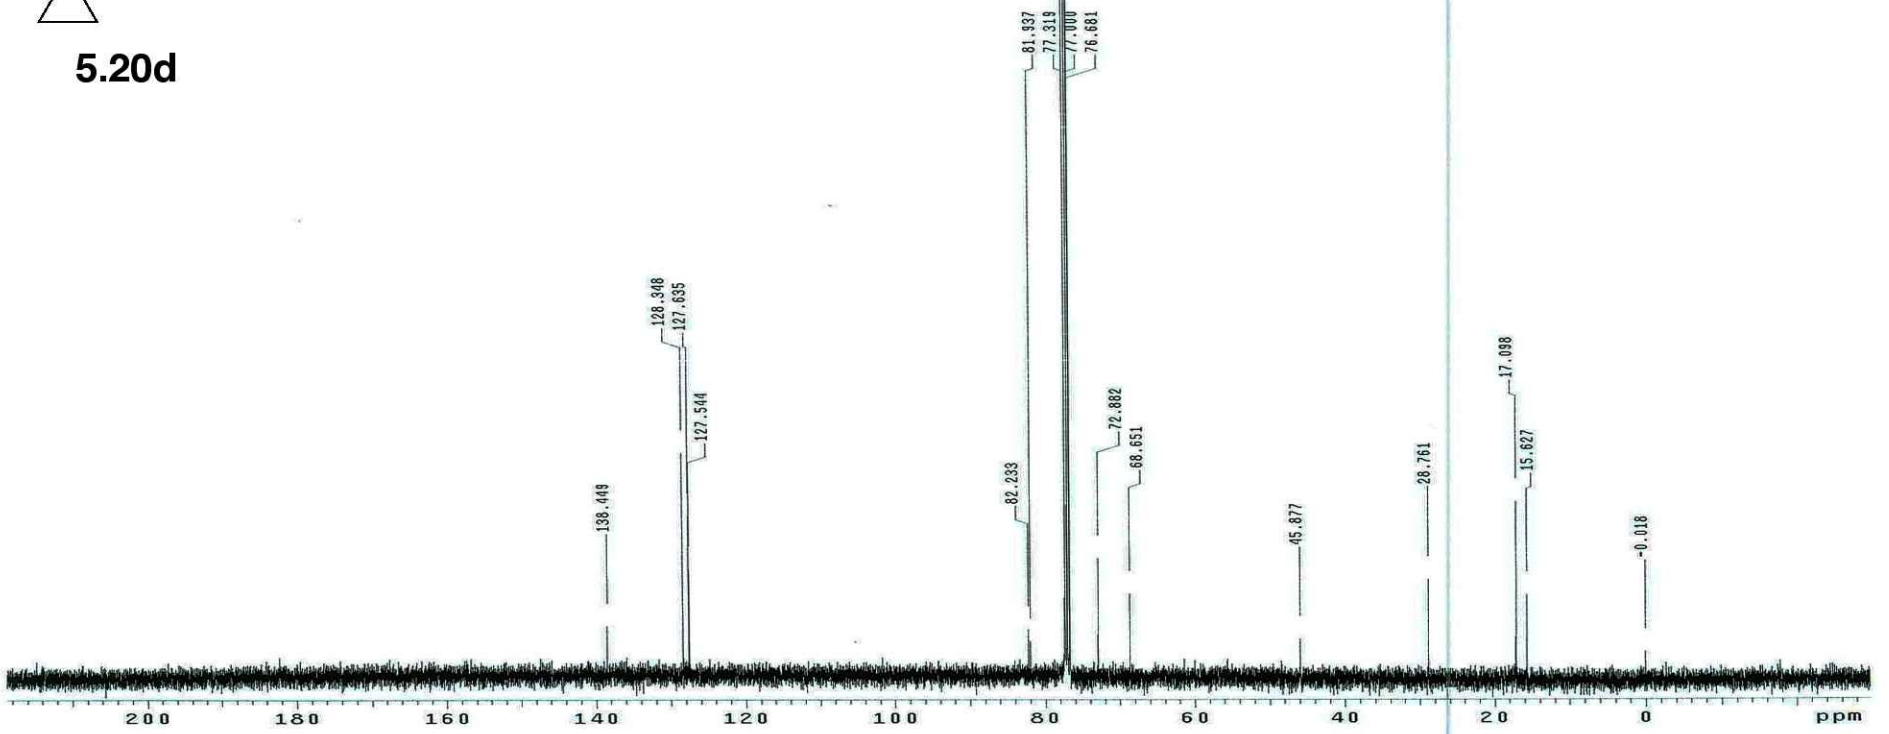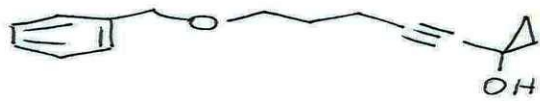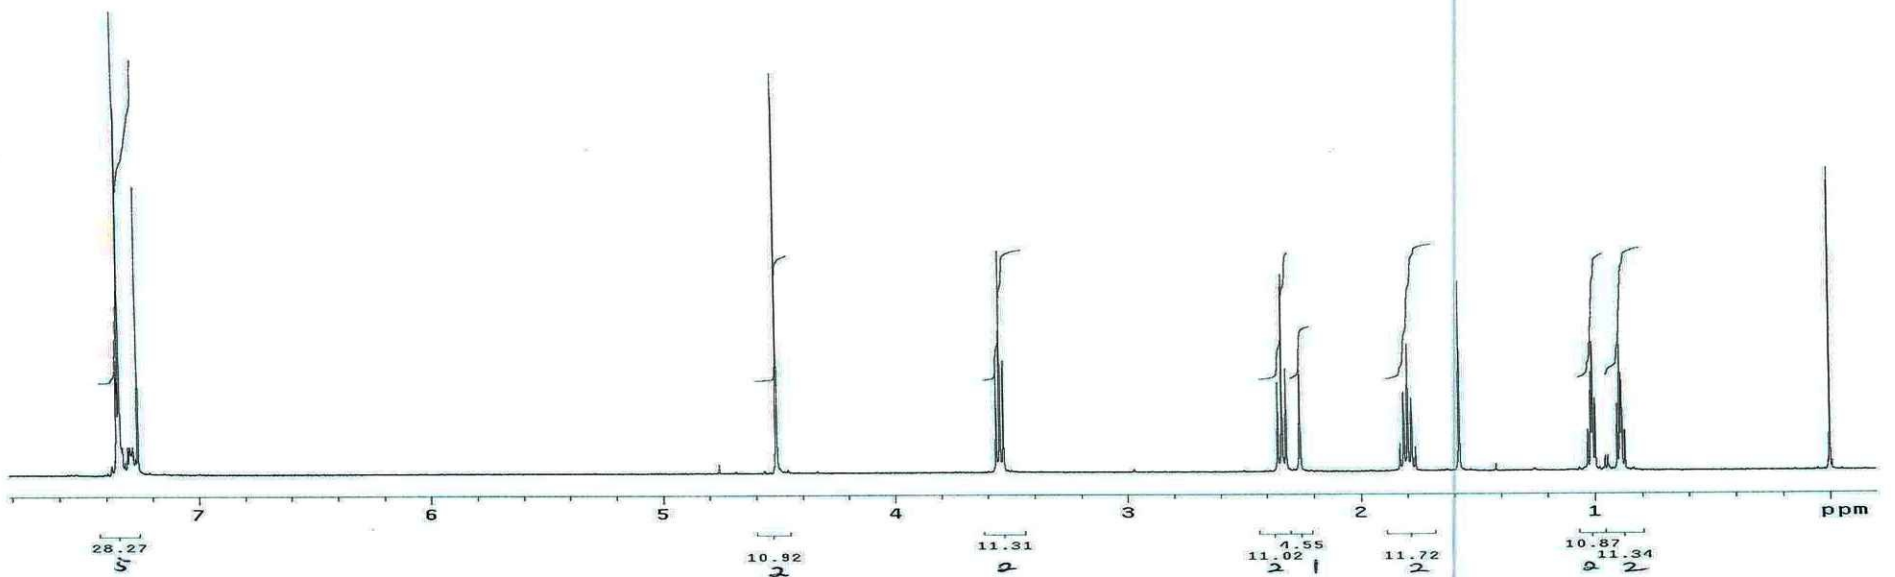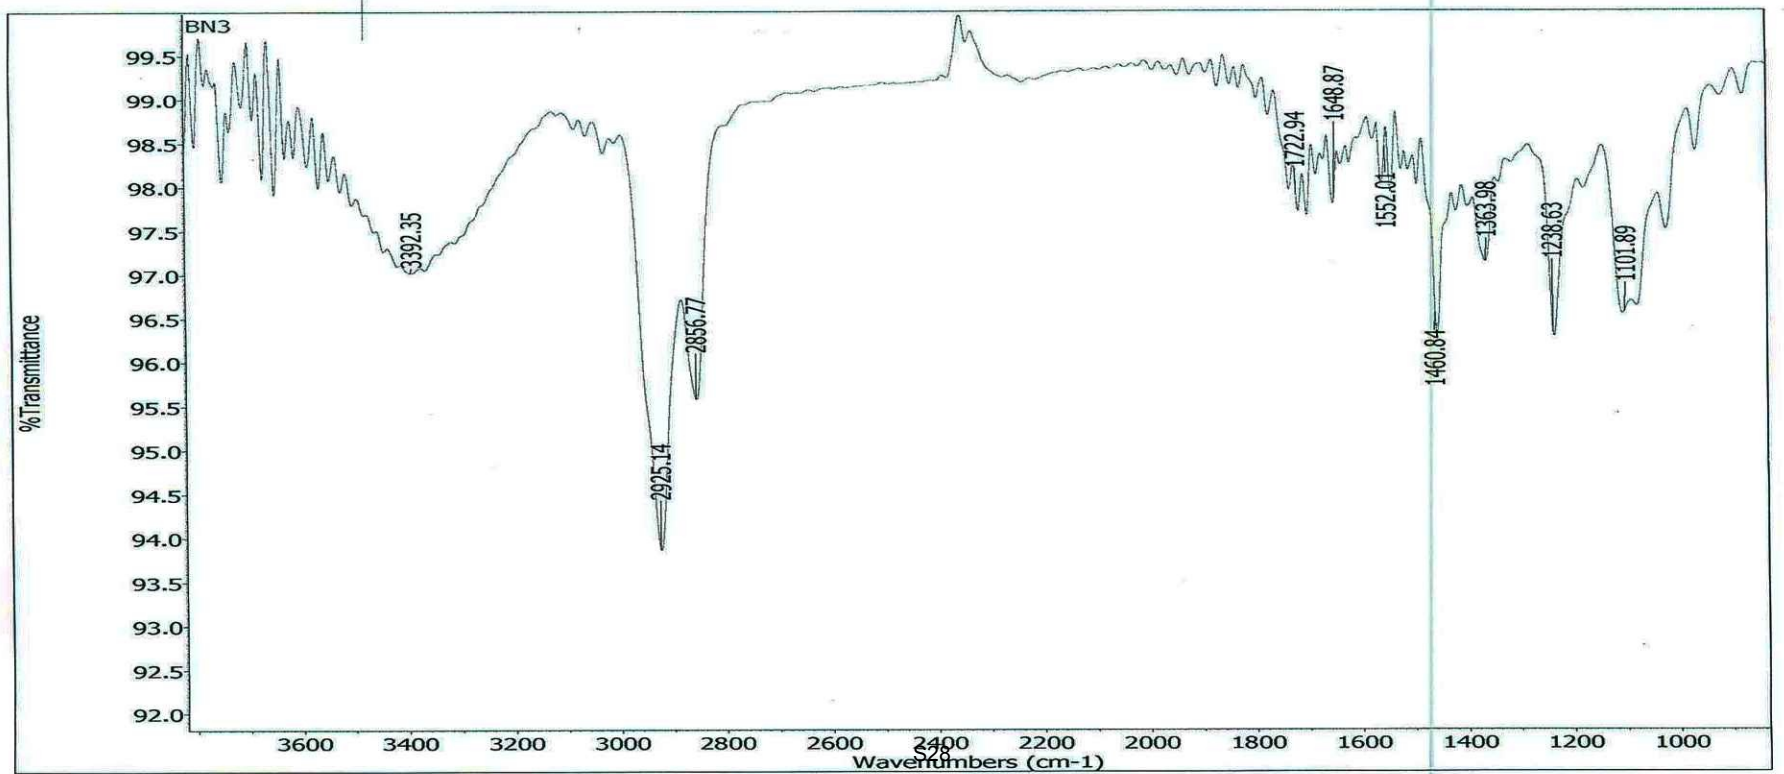



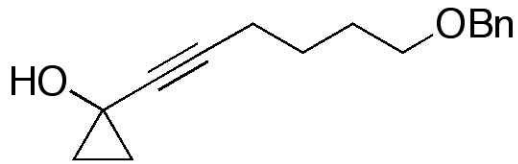

5.20e

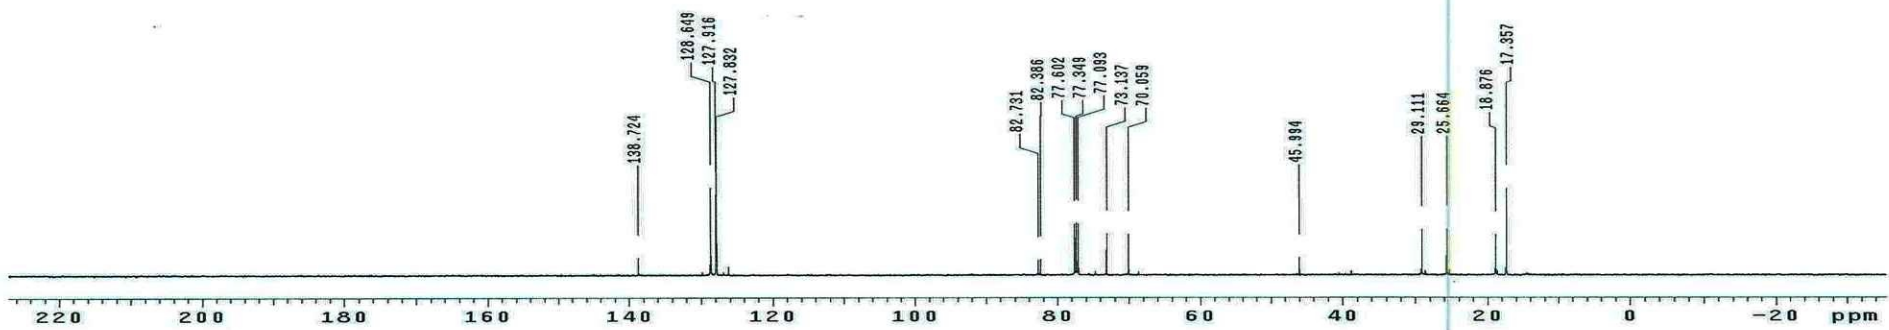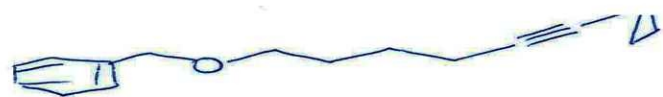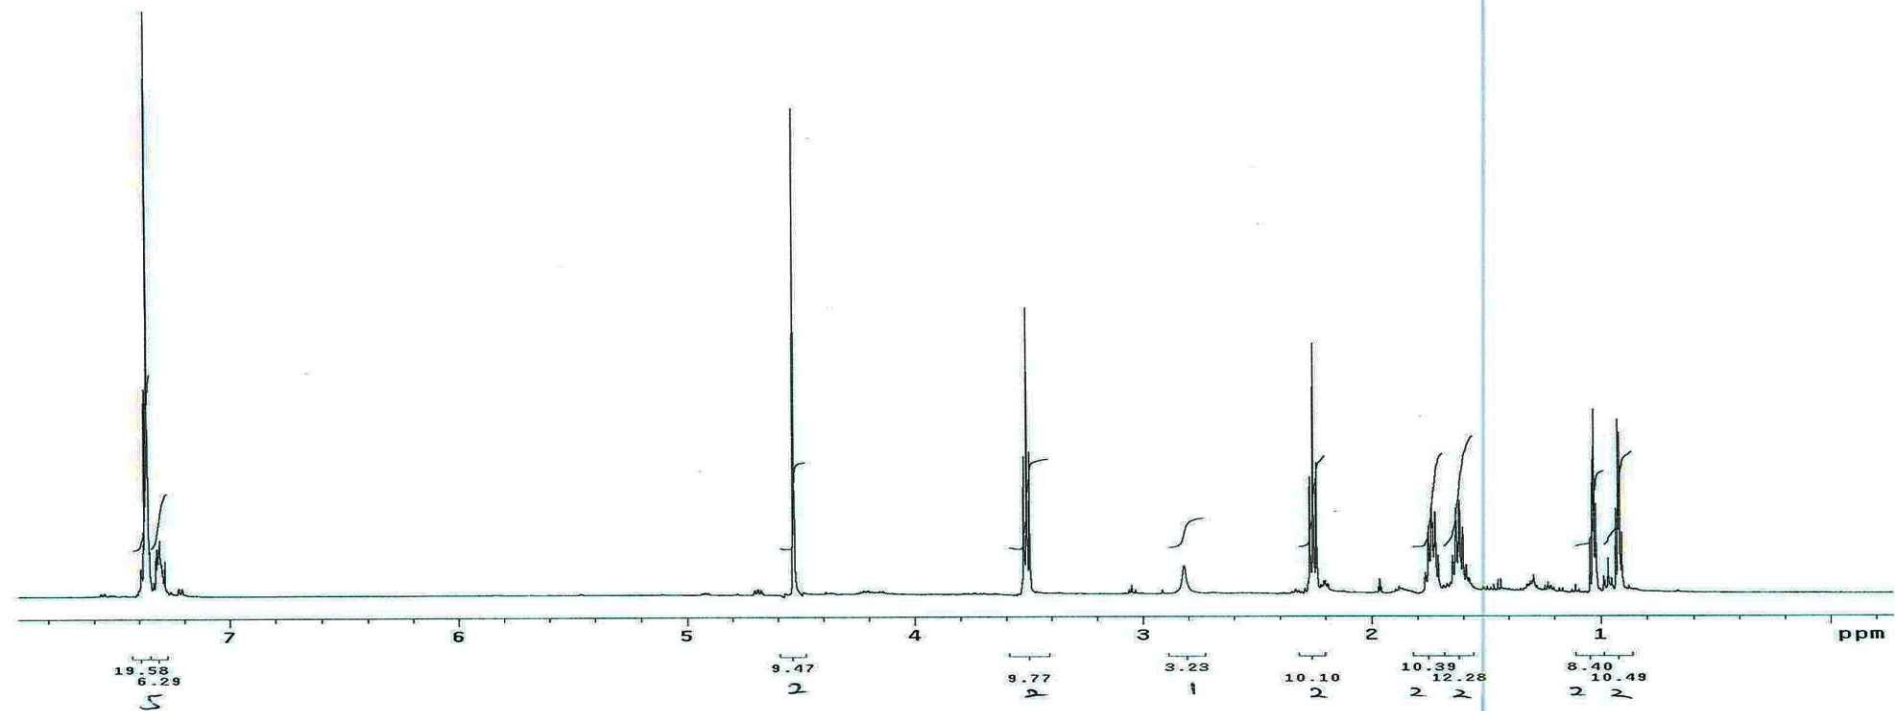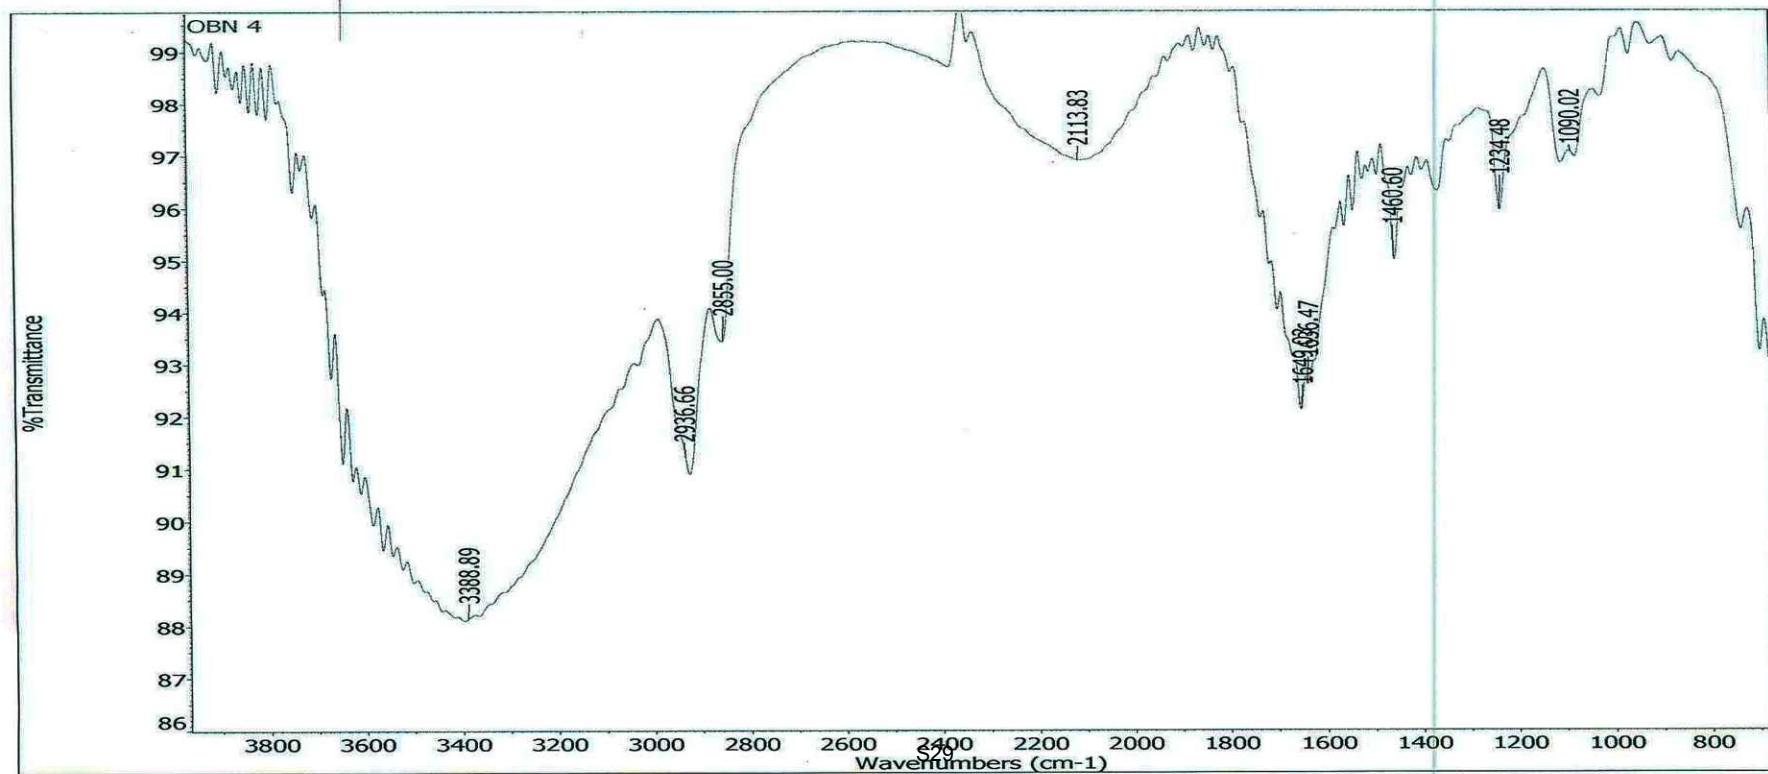

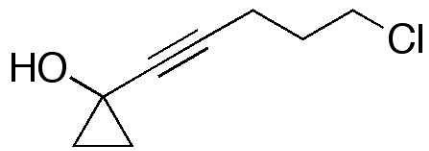

5.20f

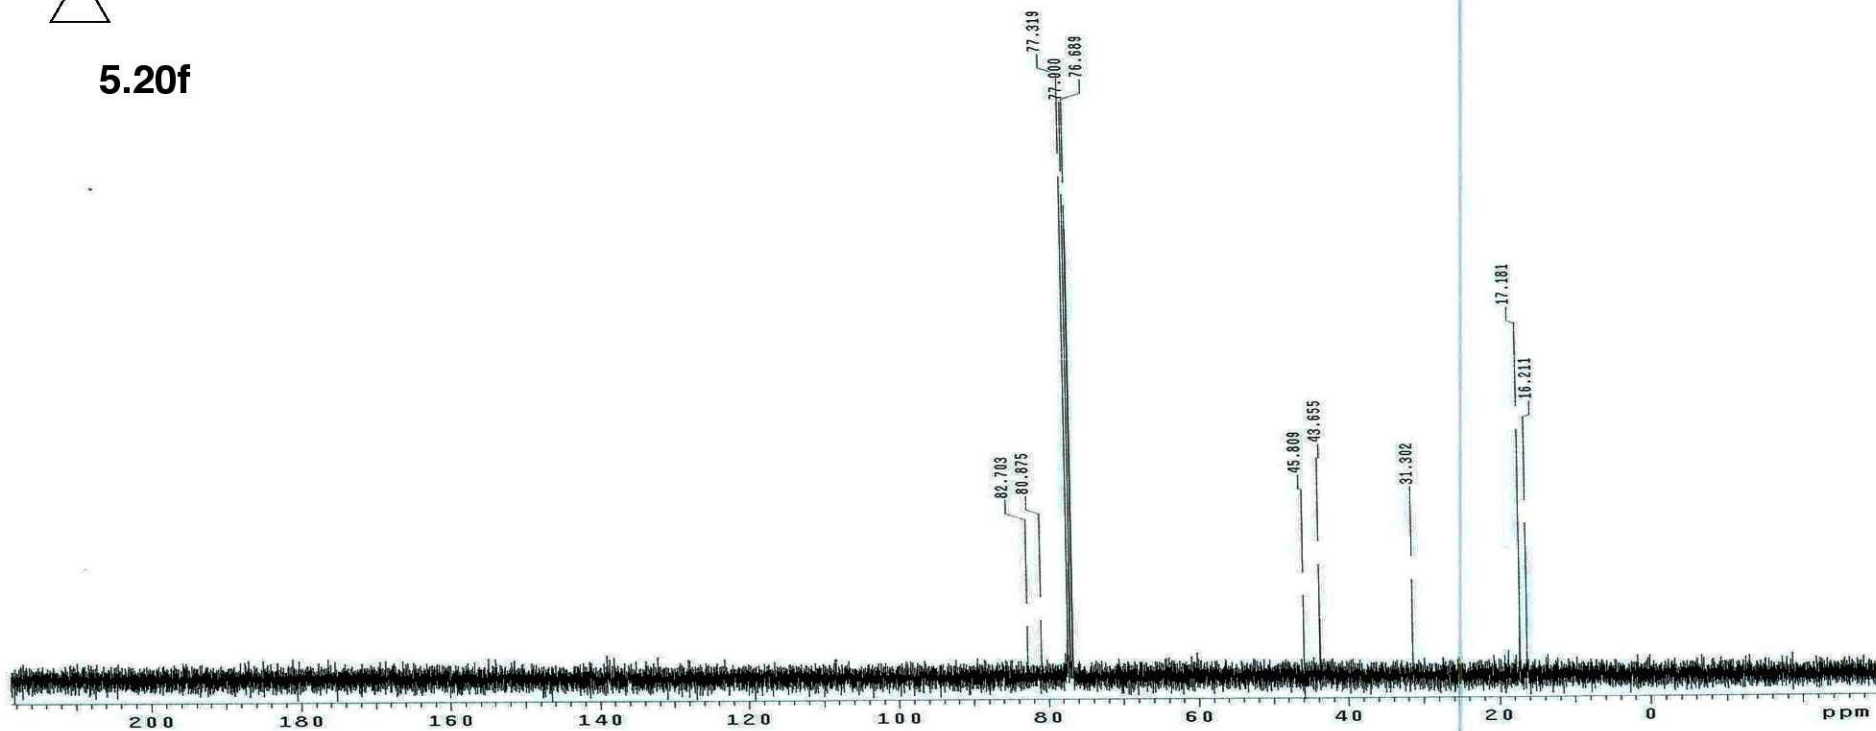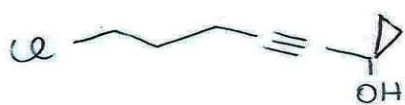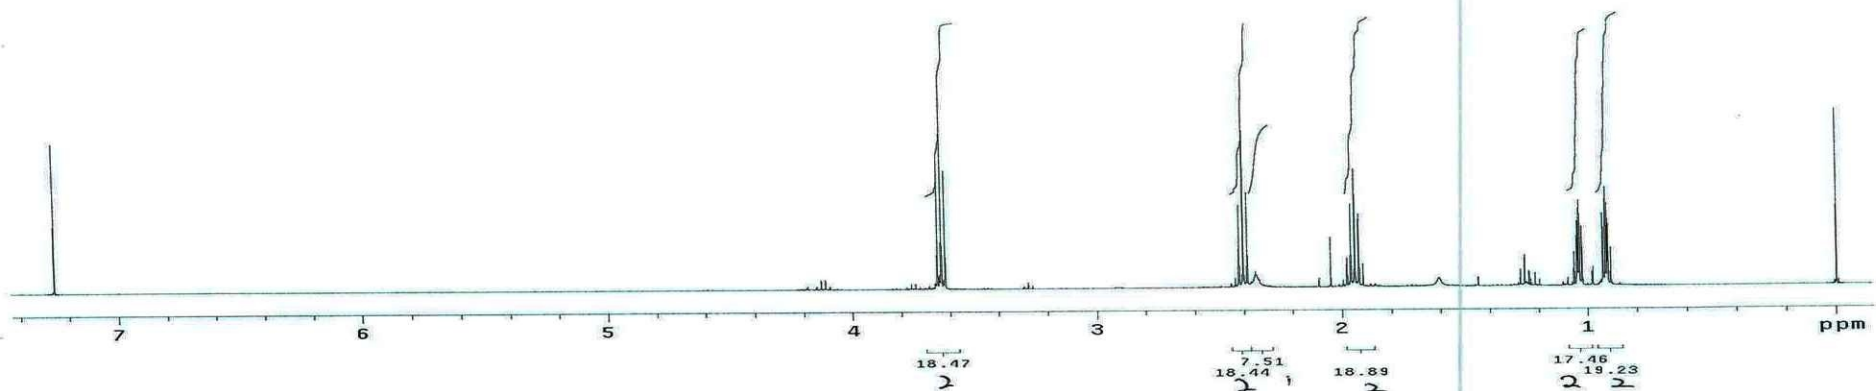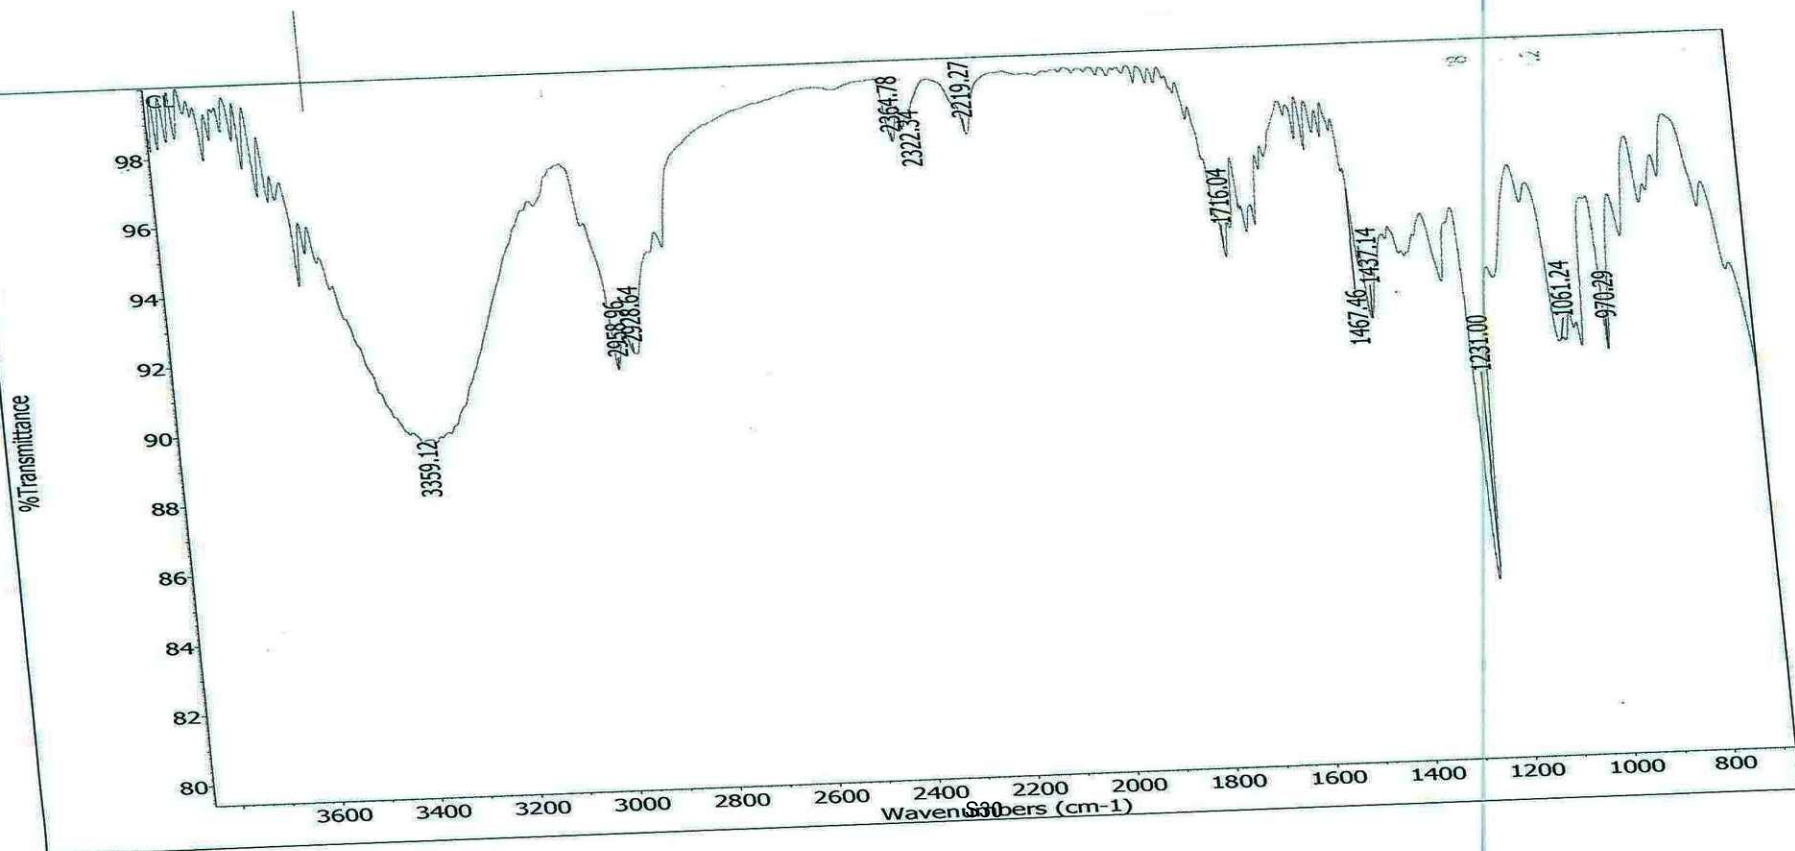

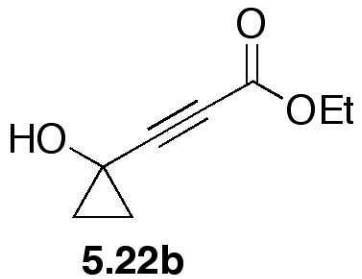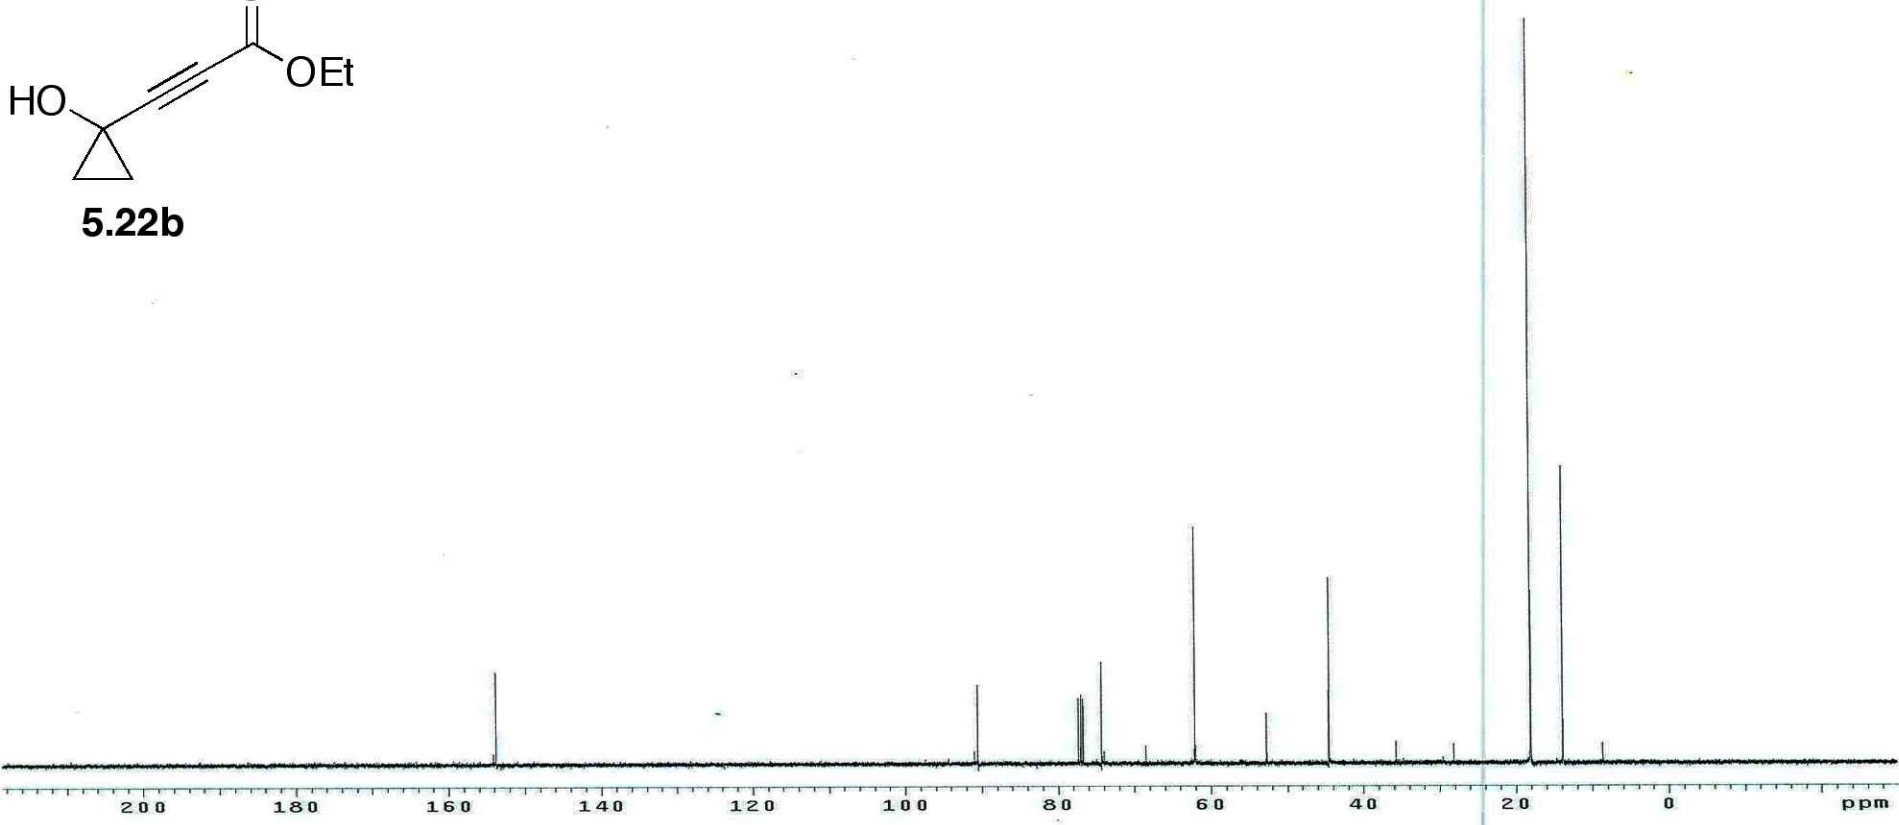

JX-XV-54  
 Pulse Sequence: s2pu1  
 Solvent: CDC13  
 Ambient temperature  
 Mercury-400BB "merc400"  
 Relax. delay 0.500 sec  
 Pulse 57.1 degrees  
 Acq. time 4.002 sec  
 Width 4997.5 Hz  
 16 repetitions  
 OBSERVE H1, 400.1115367 MHz  
 DATA PROCESSING  
 FT size 65336  
 Total time 0 min, 0 sec

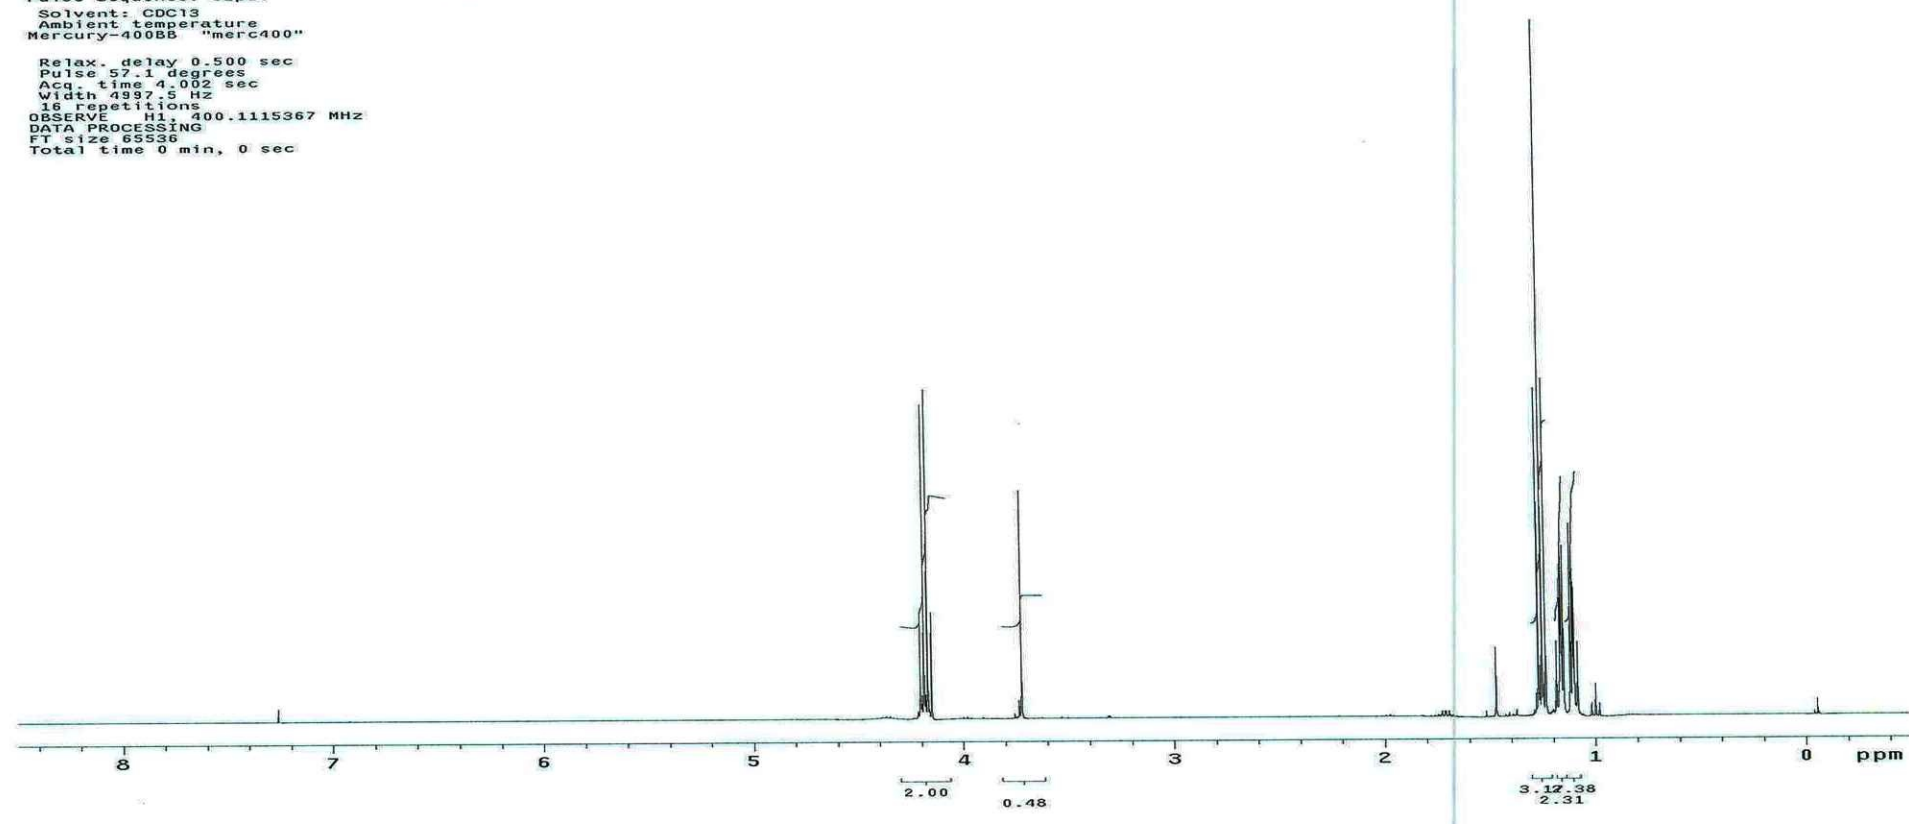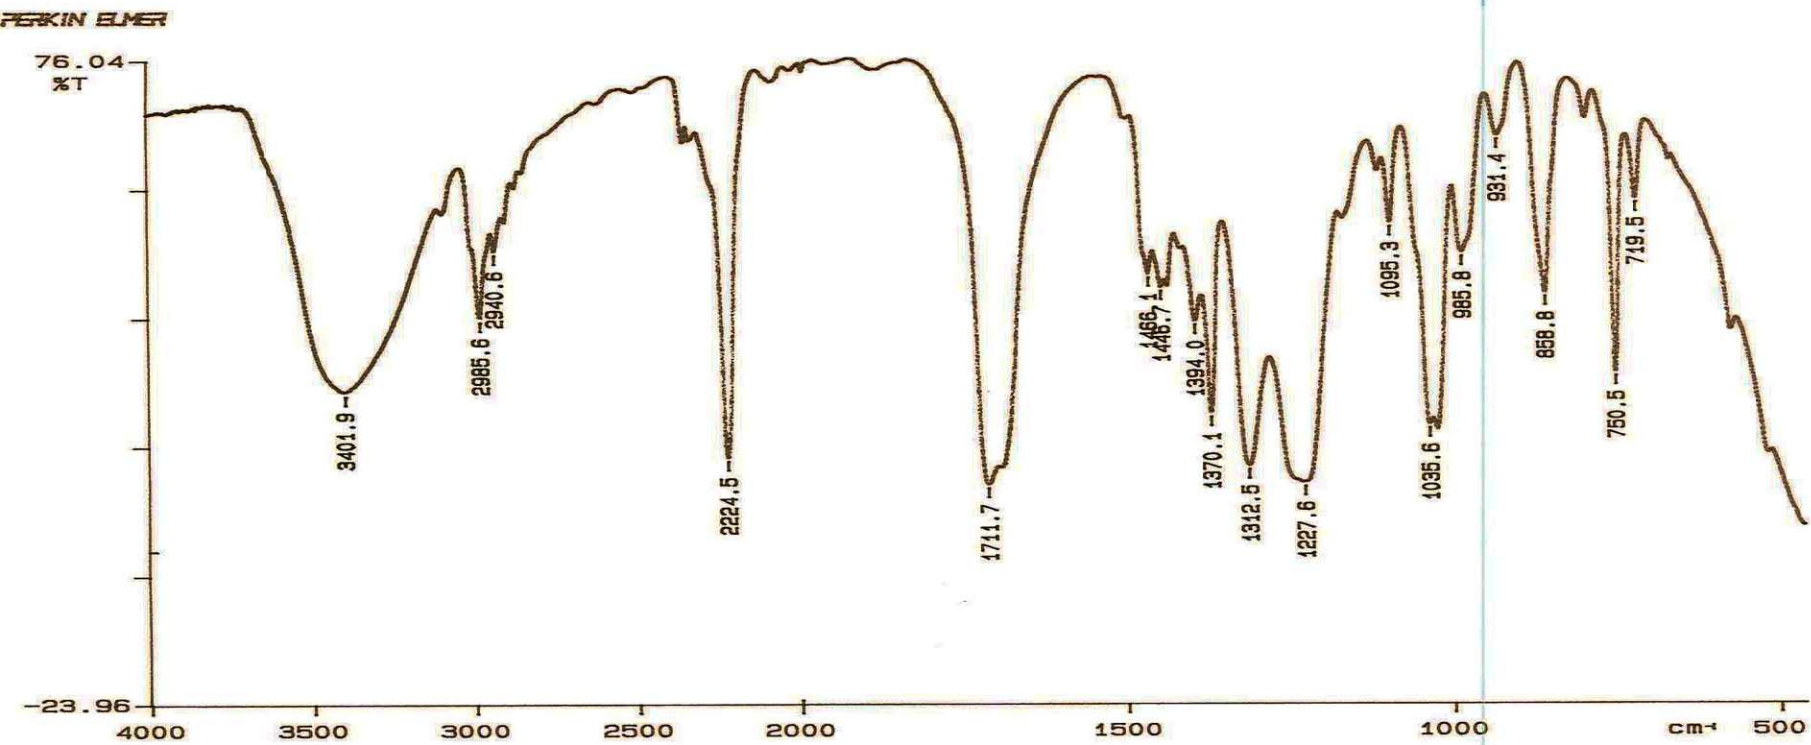



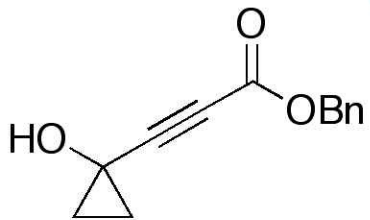

5.22c

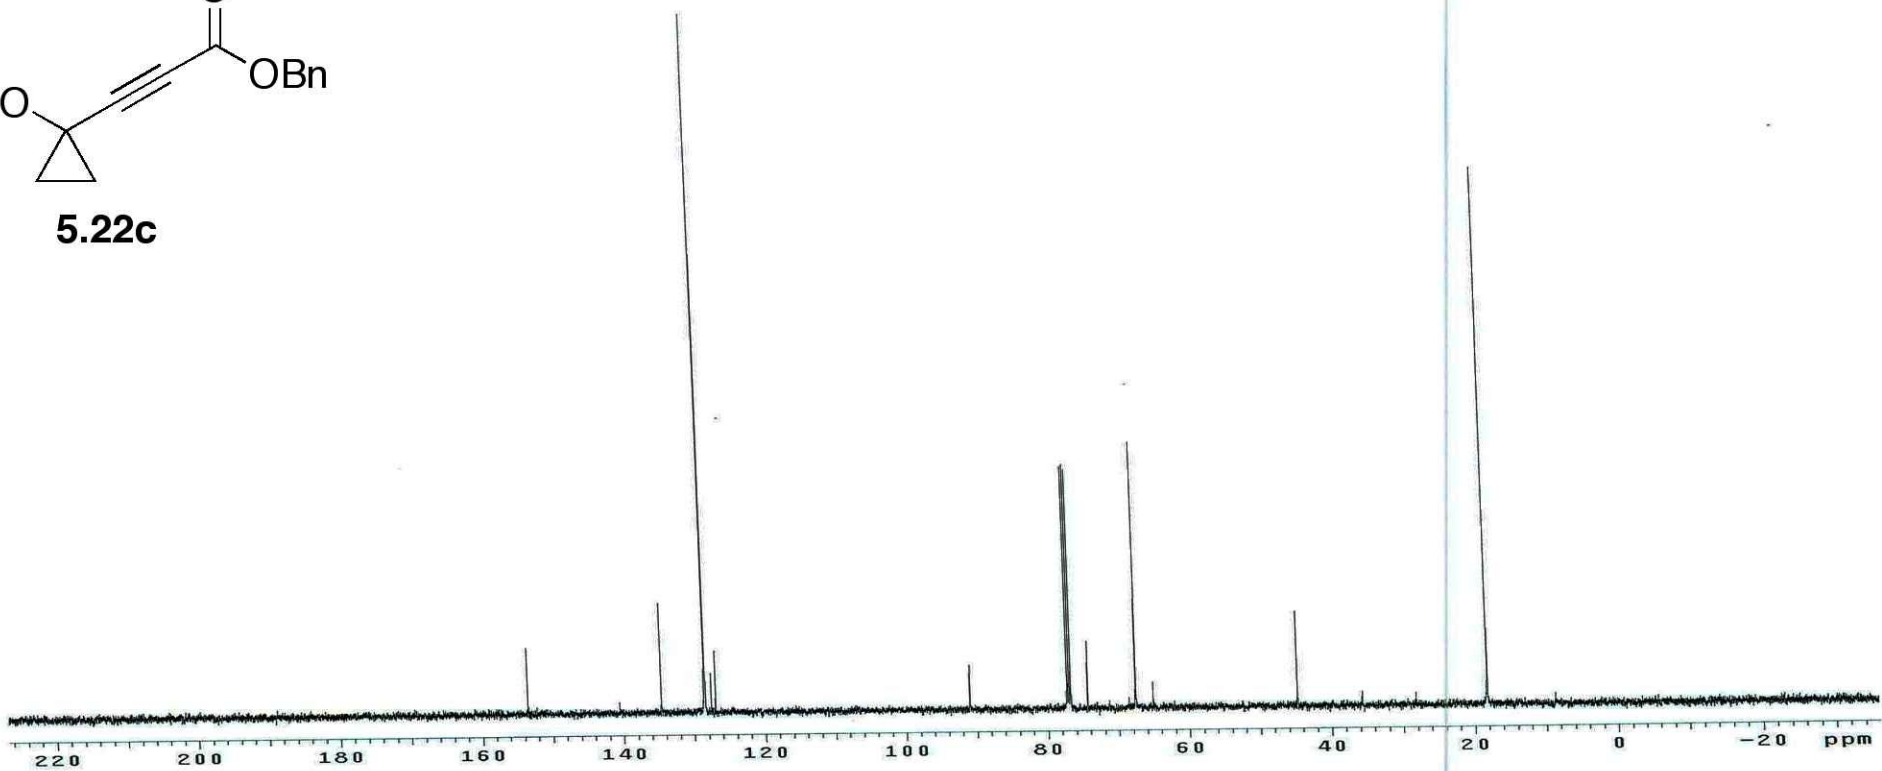

JX-XV-86  
 Pulse Sequence: s2pu1  
 Solvent: CDCl3  
 Ambient temperature  
 INOVA-500 "ui500"  
 Pulse 60.0 degrees  
 Acq. time 4.000 sec  
 Width 8000.0 Hz  
 8 repetitions  
 OBSERVE H1, 499.7485733 MHz  
 DATA PROCESSING  
 FT size 131072  
 Total time 1 min, 4 sec

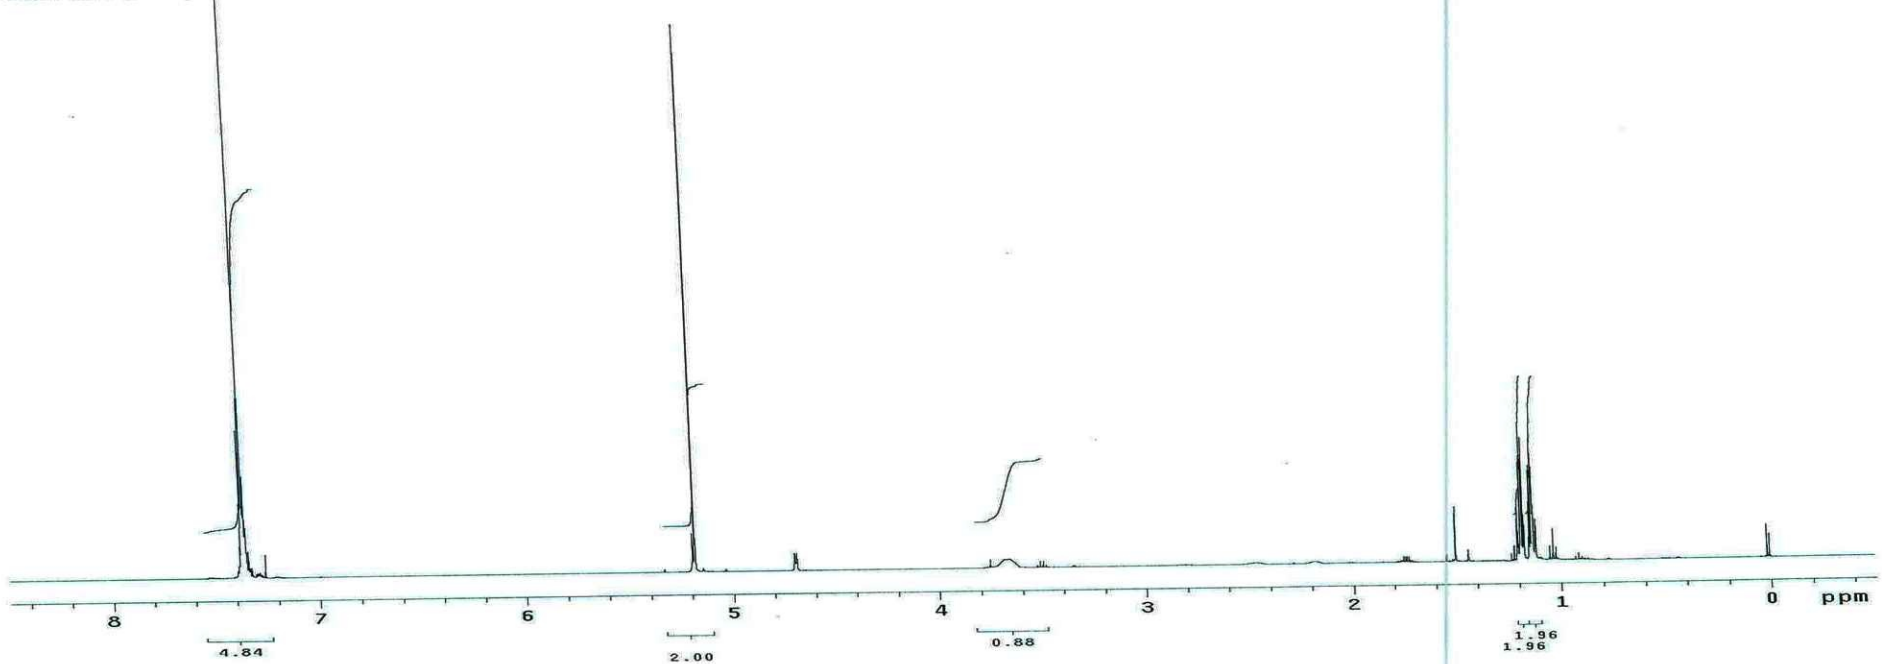

PERKIN ELMER

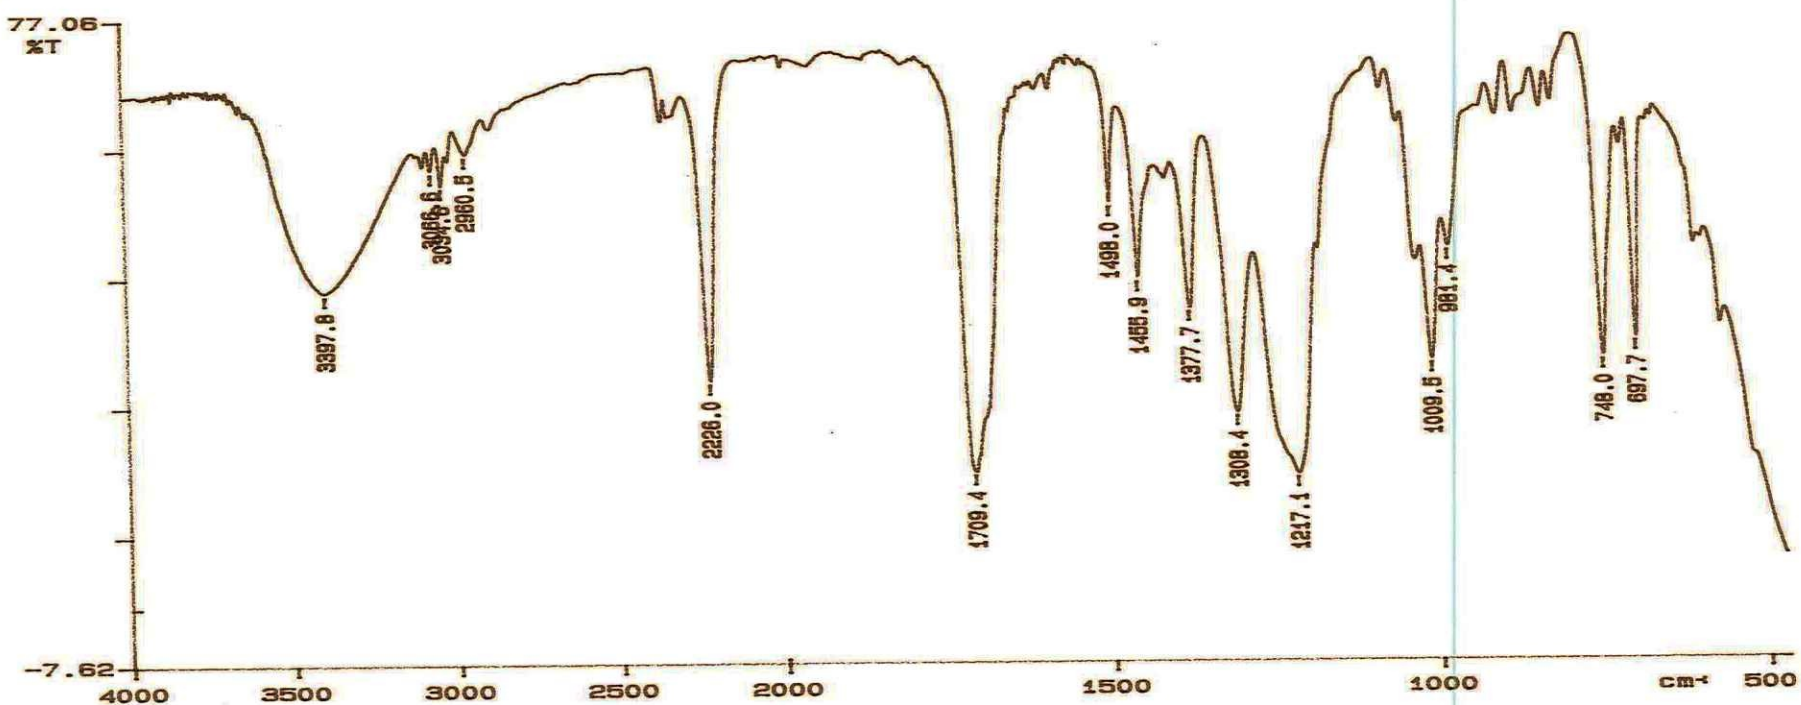

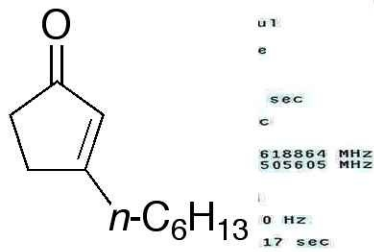

5.30a

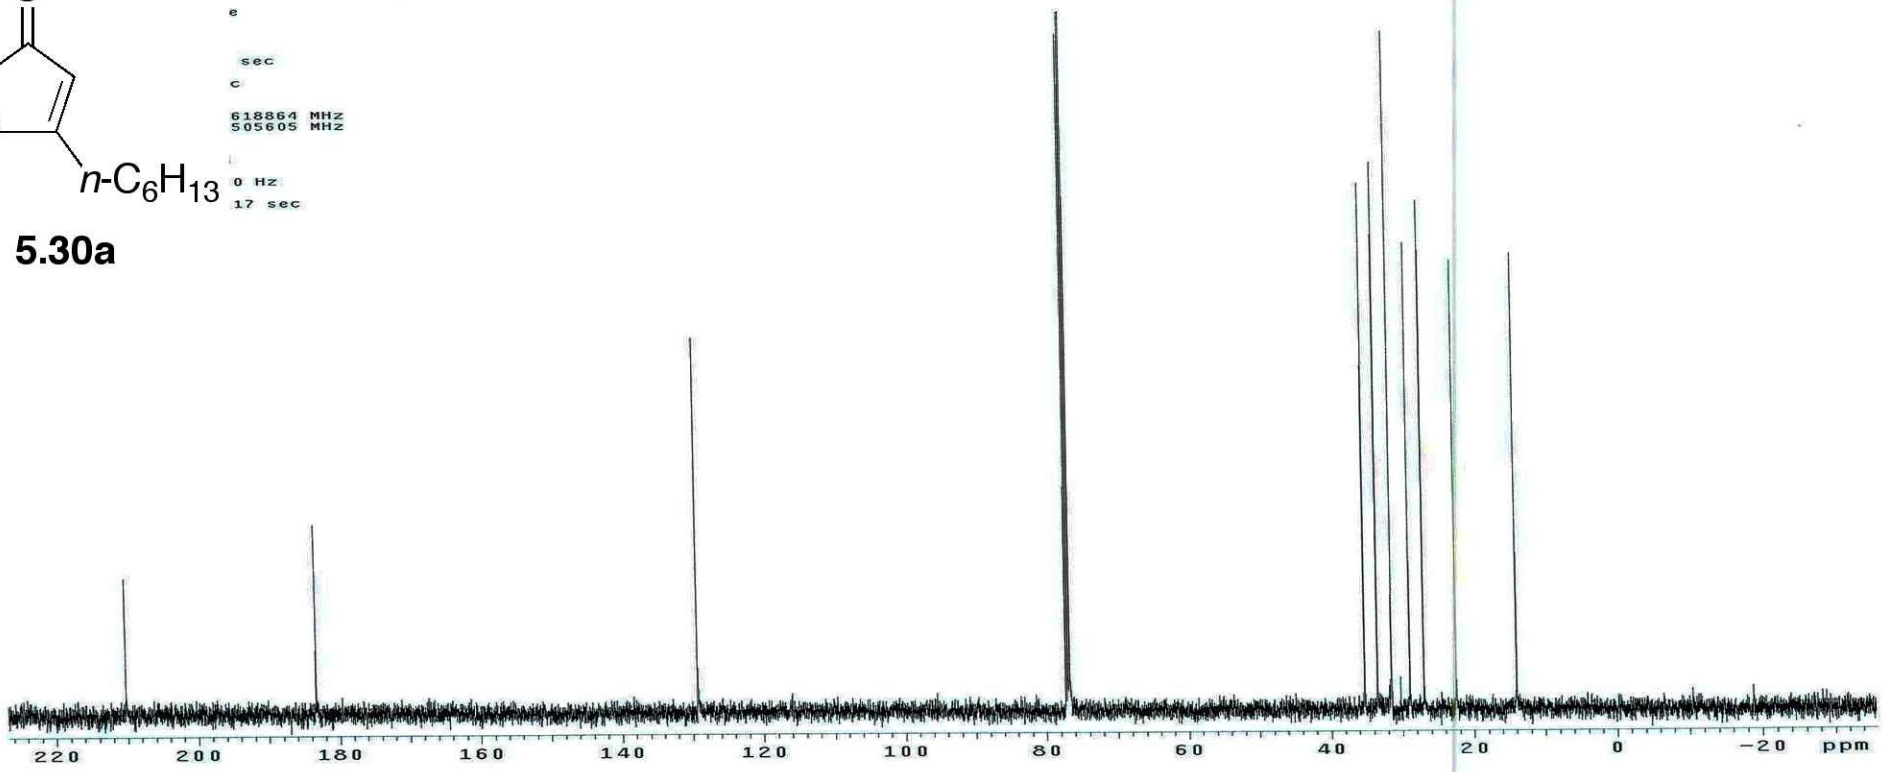

Pulse Sequence: s2pu1  
 Solvent: CDCl3  
 Ambient temperature  
 INOVA-500 "ui500"  
 Pulse 60.0 degrees  
 Acq. time 4.000 sec  
 Width 8000.0 Hz  
 12 repetitions  
 OBSERVE H1 499.7485574 MHz  
 DATA PROCESSING  
 FT size 131072  
 Total time 1 min, 4 sec

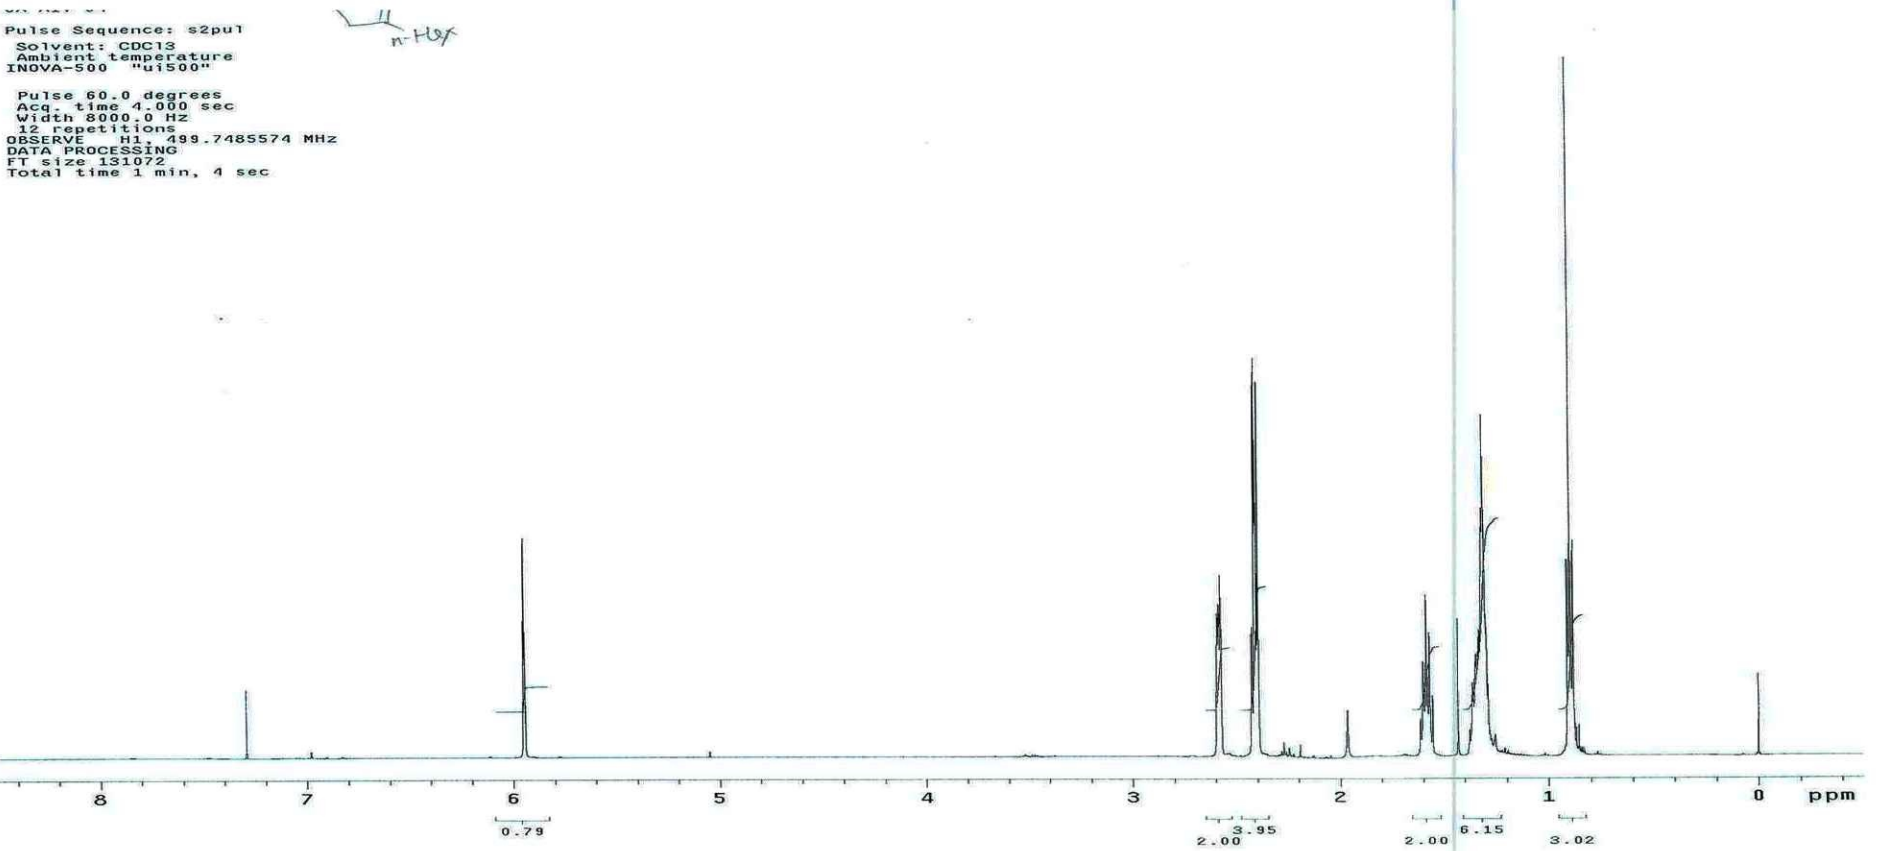

PERKIN ELMER

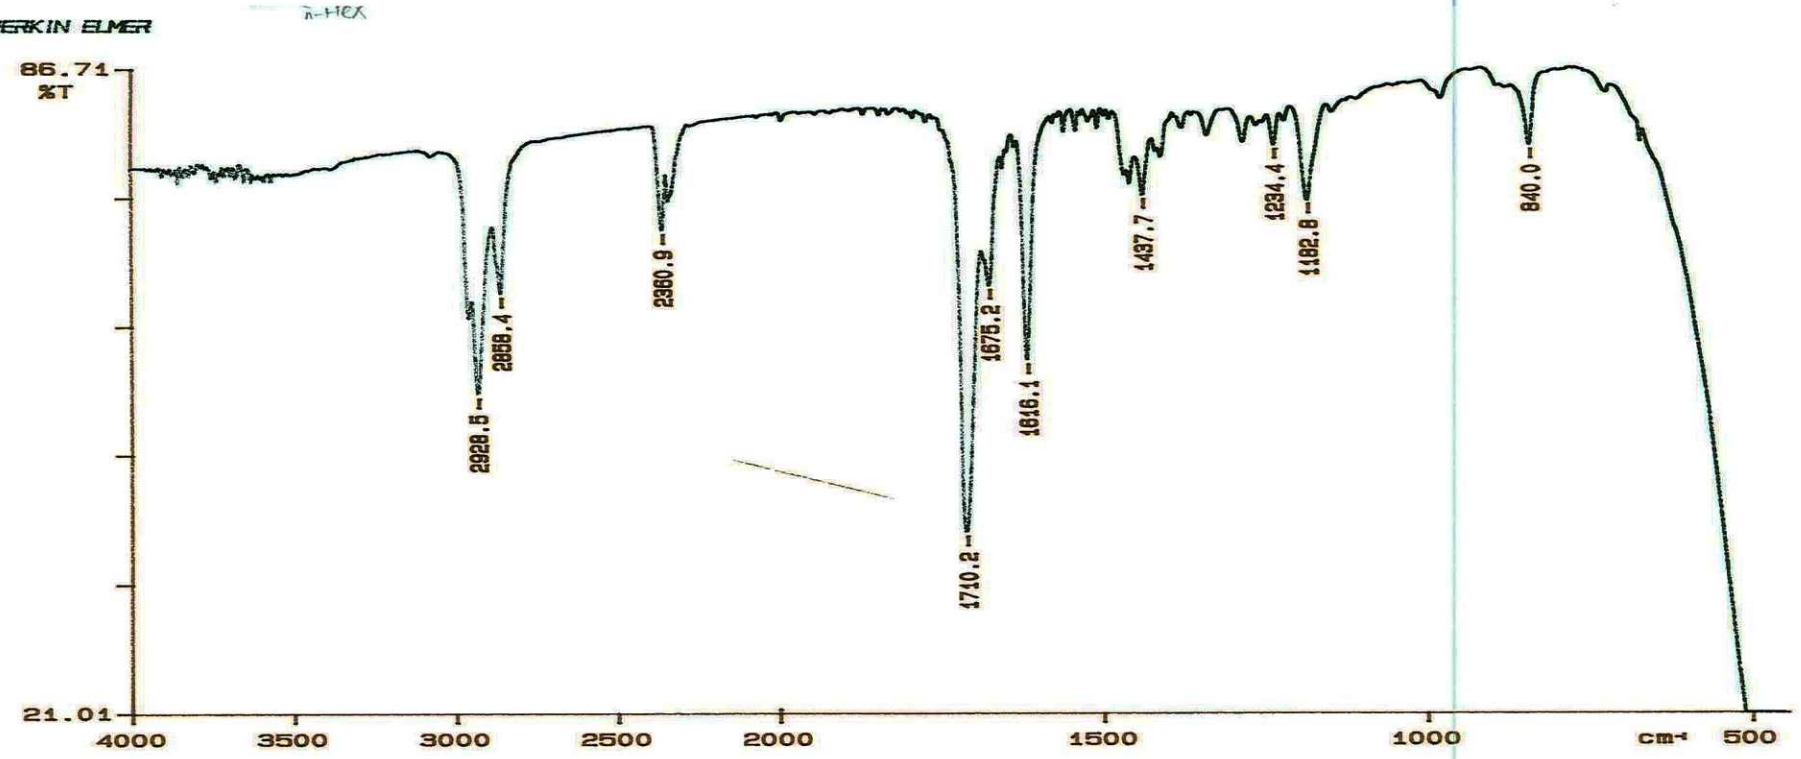

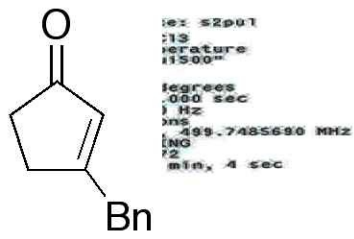

ex: s2pu1  
 :13  
 erature  
 11500"  
 edegrees  
 .000 sec  
 ) Hz  
 ns  
 499.7485690 MHz  
 [NO  
 72  
 min, 4 sec

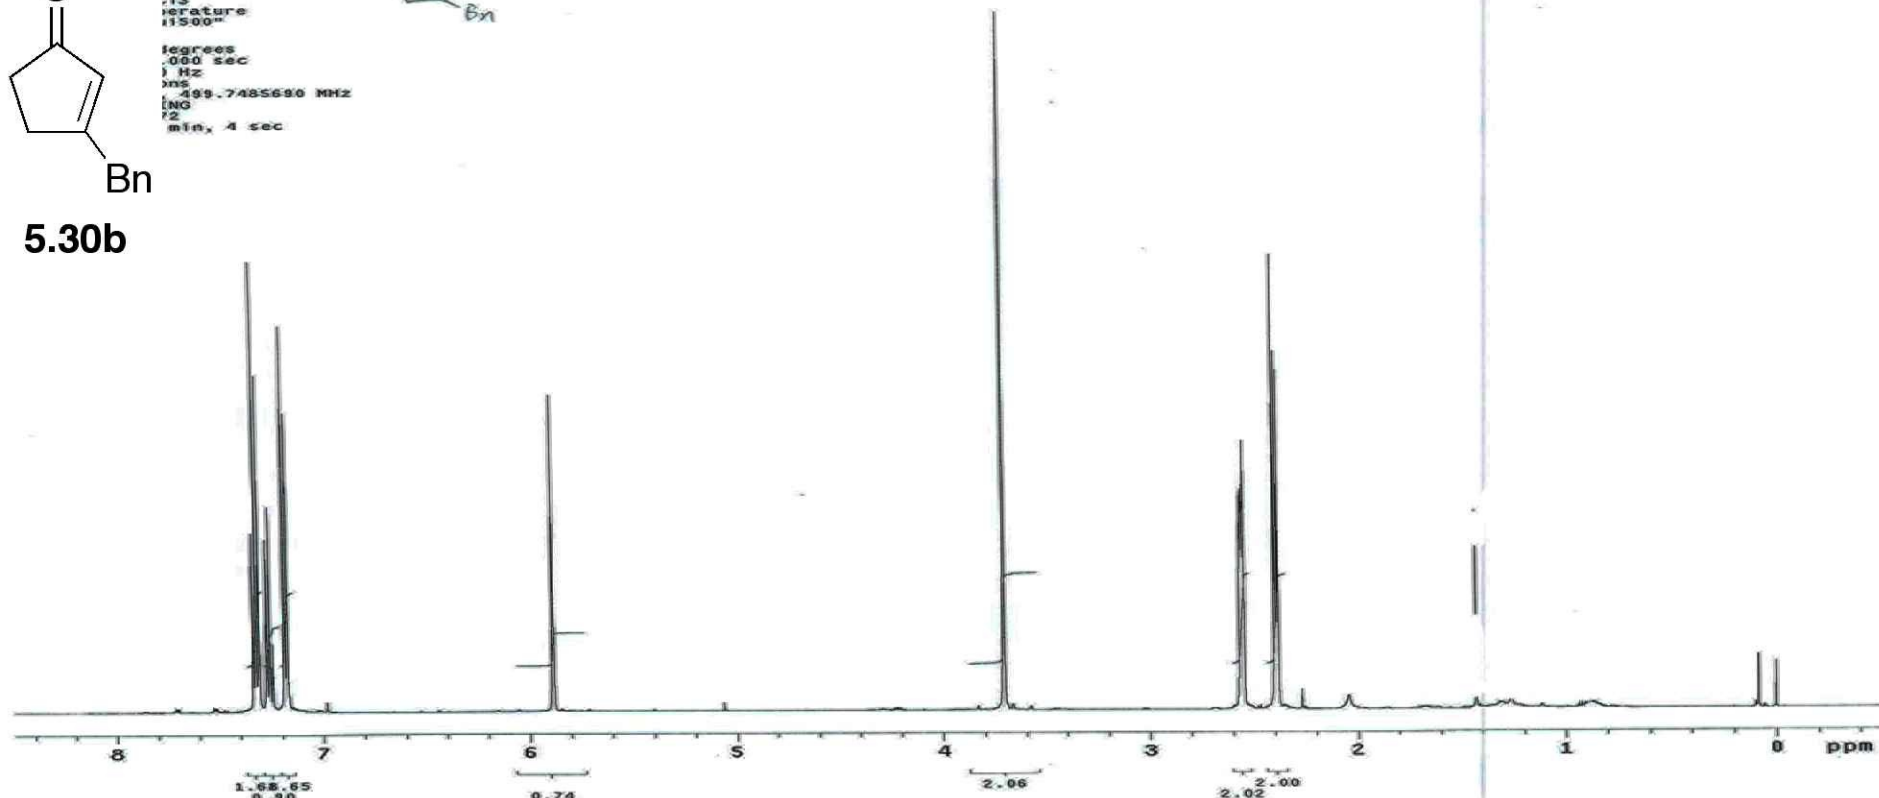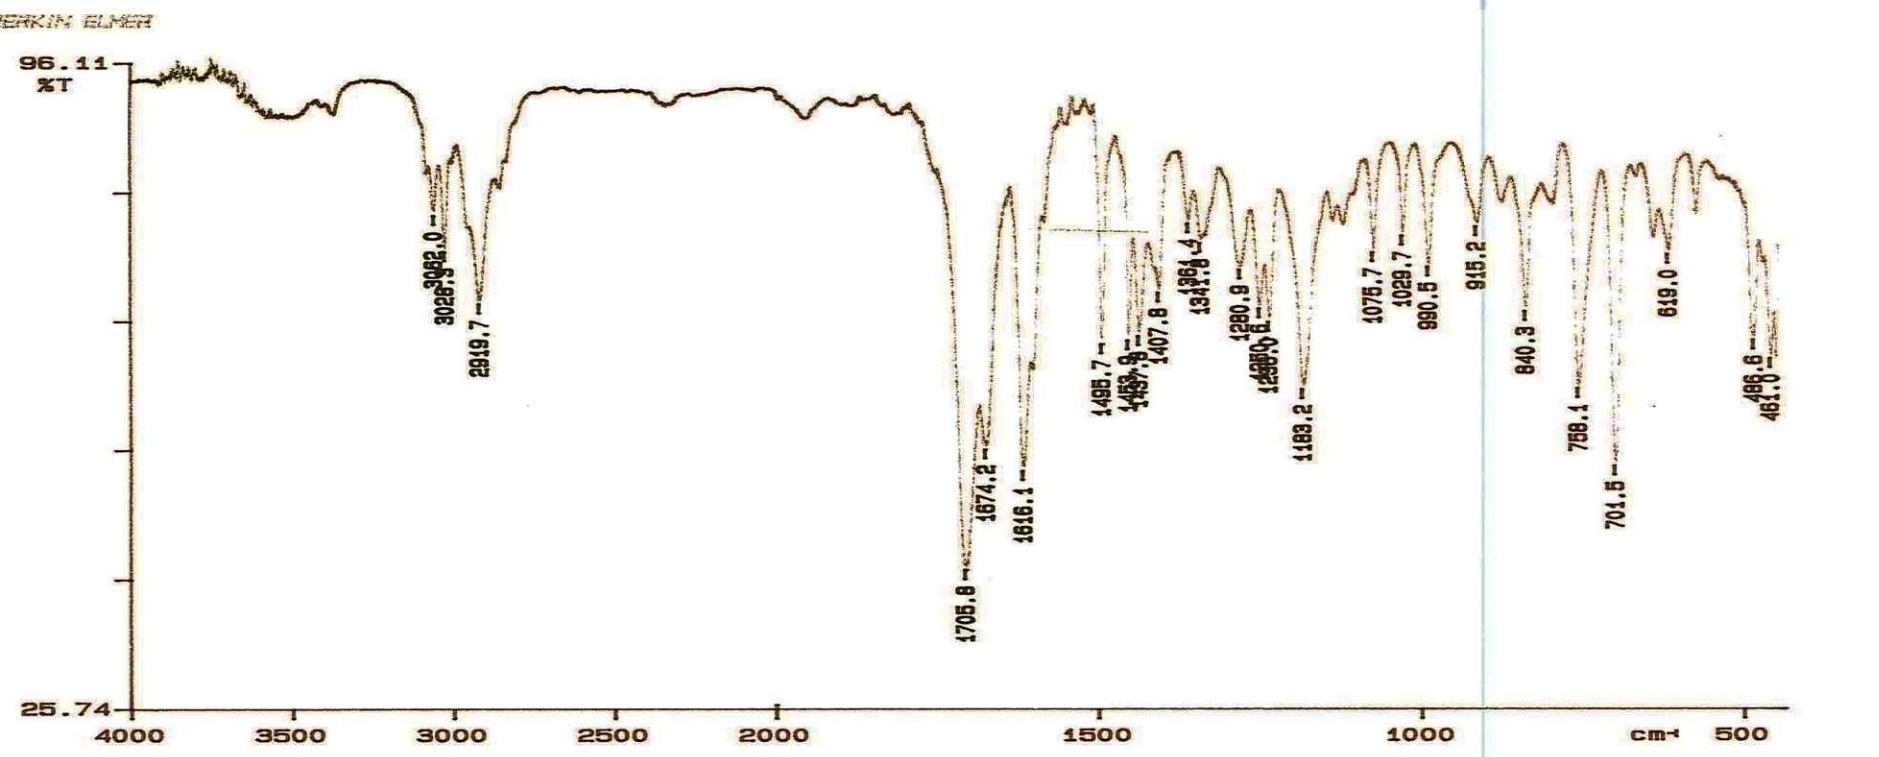

06/10/09 11:35  
 X: 4 scans, 4.0cm<sup>-1</sup>

Pulse Sequence: s2pu1  
 Solvent: CDCl3  
 Ambient temperature  
 User: 1-15-87  
 INOVA-500 "ui500"  
 Relax. delay 0.500 sec  
 Pulse 33.3 degrees  
 Acq. time 1.500 sec  
 Width 33003.3 Hz  
 52 repetitions  
 OBSERVE C13, 125.8618975 MHz  
 DECOUPLE H1, 499.7505605 MHz  
 Power 42 dB  
 continuously on  
 WALTZ-16 modulated  
 DATA PROCESSING  
 Line broadening 2.0 Hz  
 FT size 131072  
 Total time 34 min, 17 sec

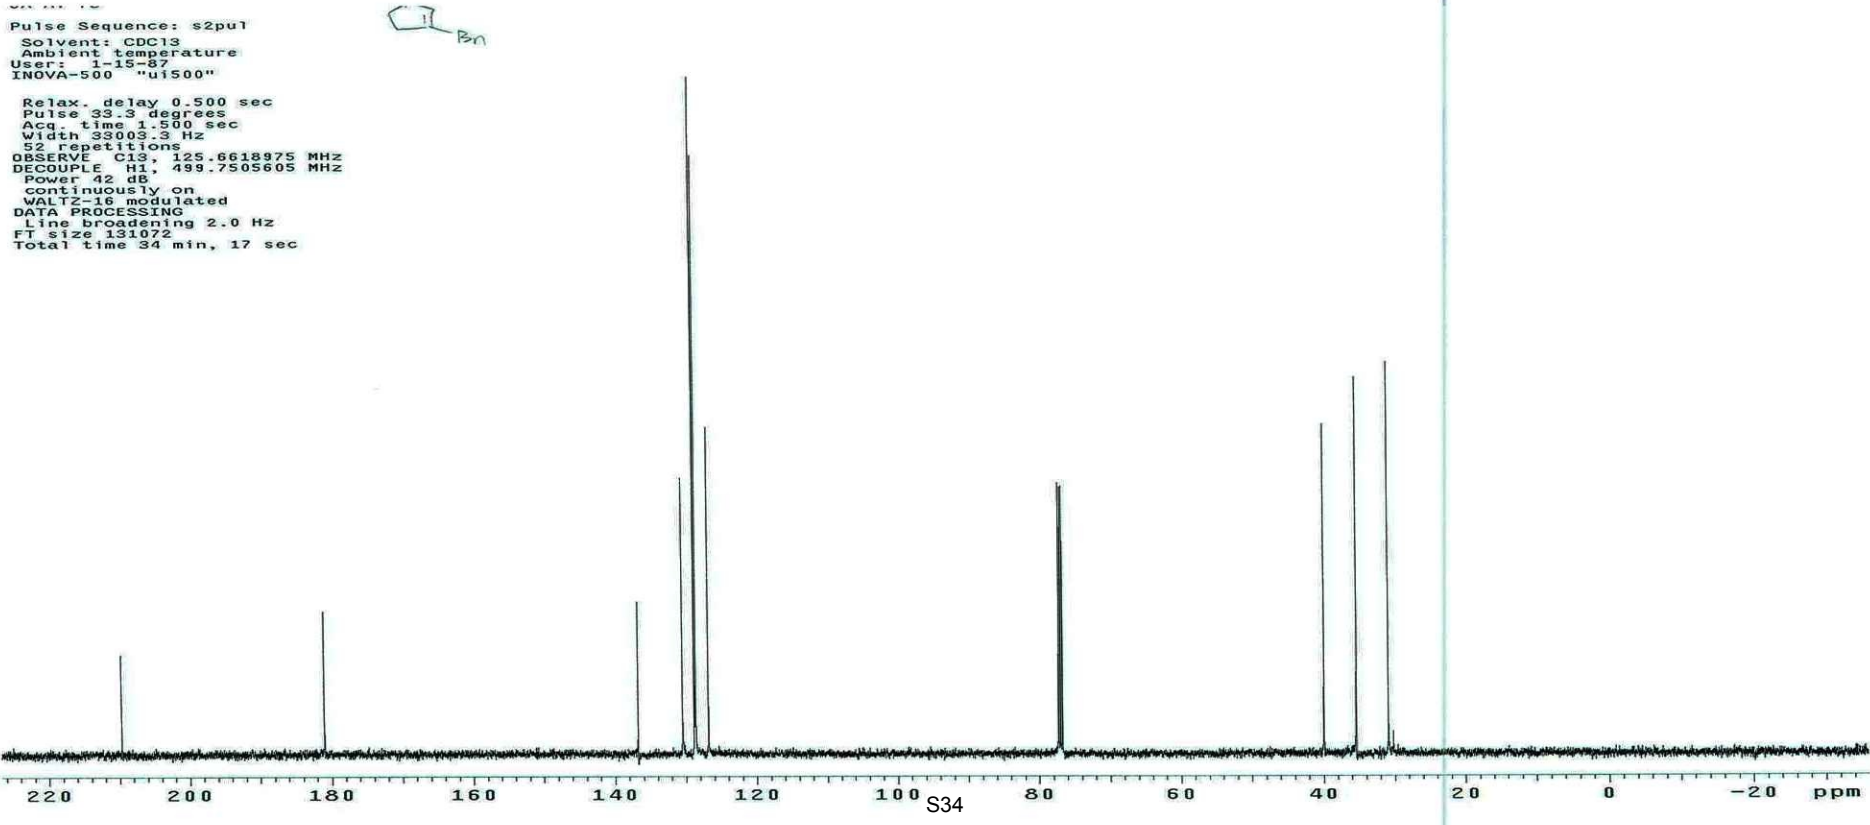



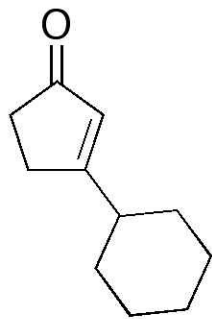

| XY | PPM     | HEIGHT |
|----|---------|--------|
| 17 | 210.362 | 21.6   |
| 18 | 187.615 | 27.2   |
| 34 | 127.751 | 58.6   |
| 35 | 77.256  | 72.7   |
| 36 | 77.000  | 73.0   |
| 39 | 76.748  | 73.2   |
| 20 | 41.790  | 58.4   |
| 34 | 34.941  | 82.0   |
| 31 | 31.142  | 150.0  |
| 30 | 29.467  | 83.0   |
| 77 | 25.892  | 151.2  |
| 13 | 25.820  | 93.4   |

5.30c

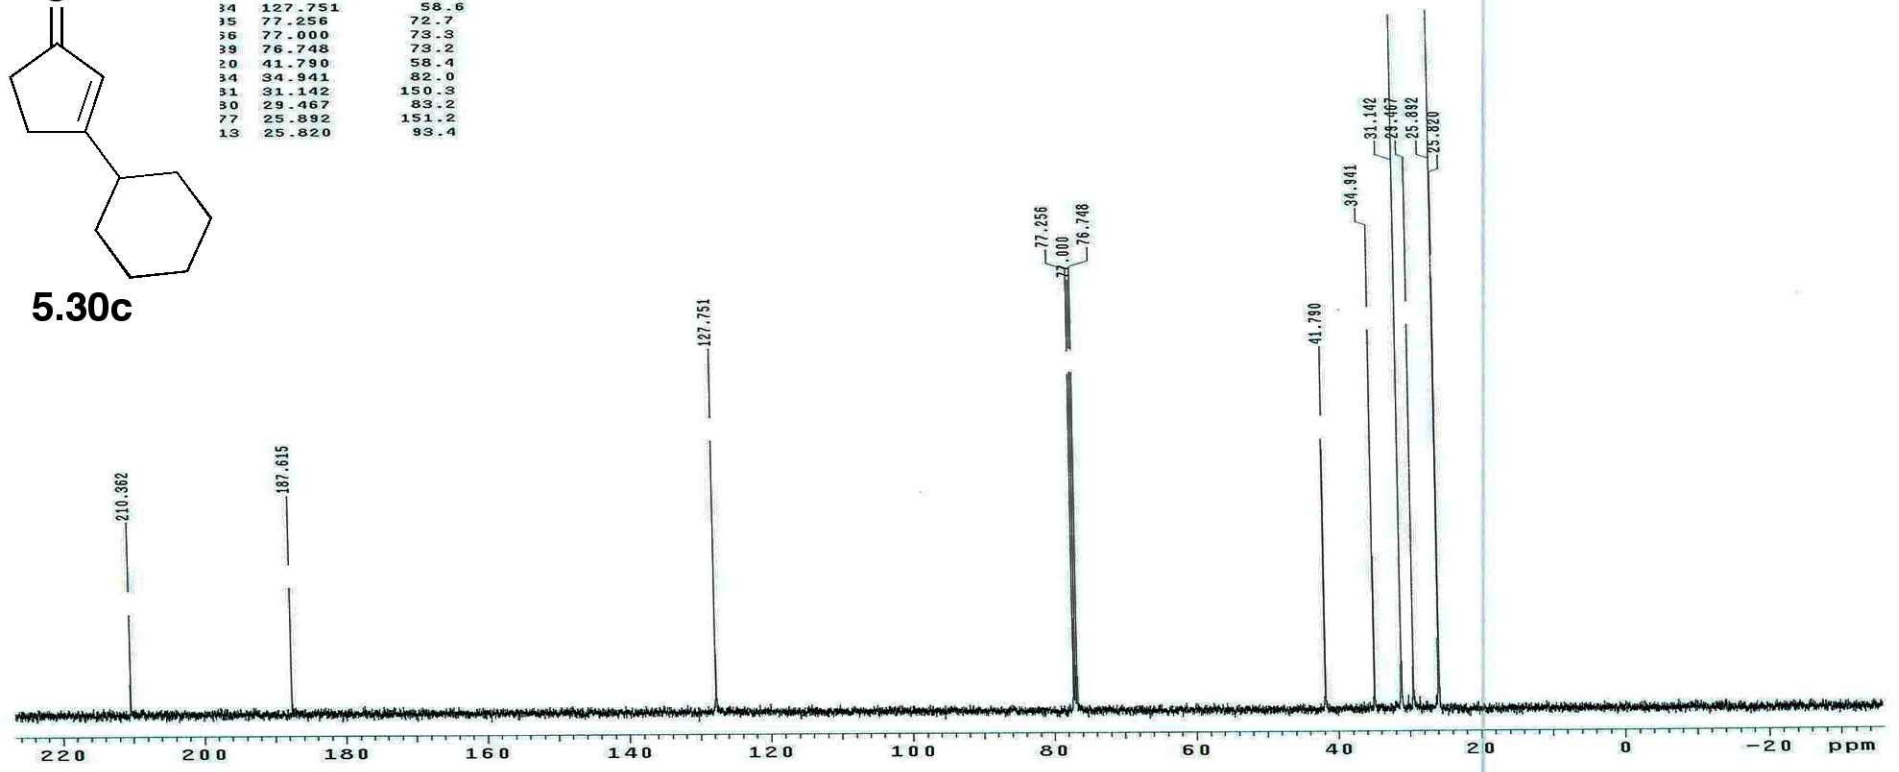

JX-XV-41  
 Pulse Sequence: s2pu1  
 Solvent: CDCl3  
 Ambient temperature  
 INOVA-500 "uis00"

Pulse 60.0 degrees  
 Acq. time 4.000 sec  
 Width 8000.0 Hz  
 3 repetitions  
 OBSERVE H1 499.7485735 MHz  
 DATA PROCESSING  
 FT size 131072  
 Total time 1 min, 4 sec

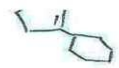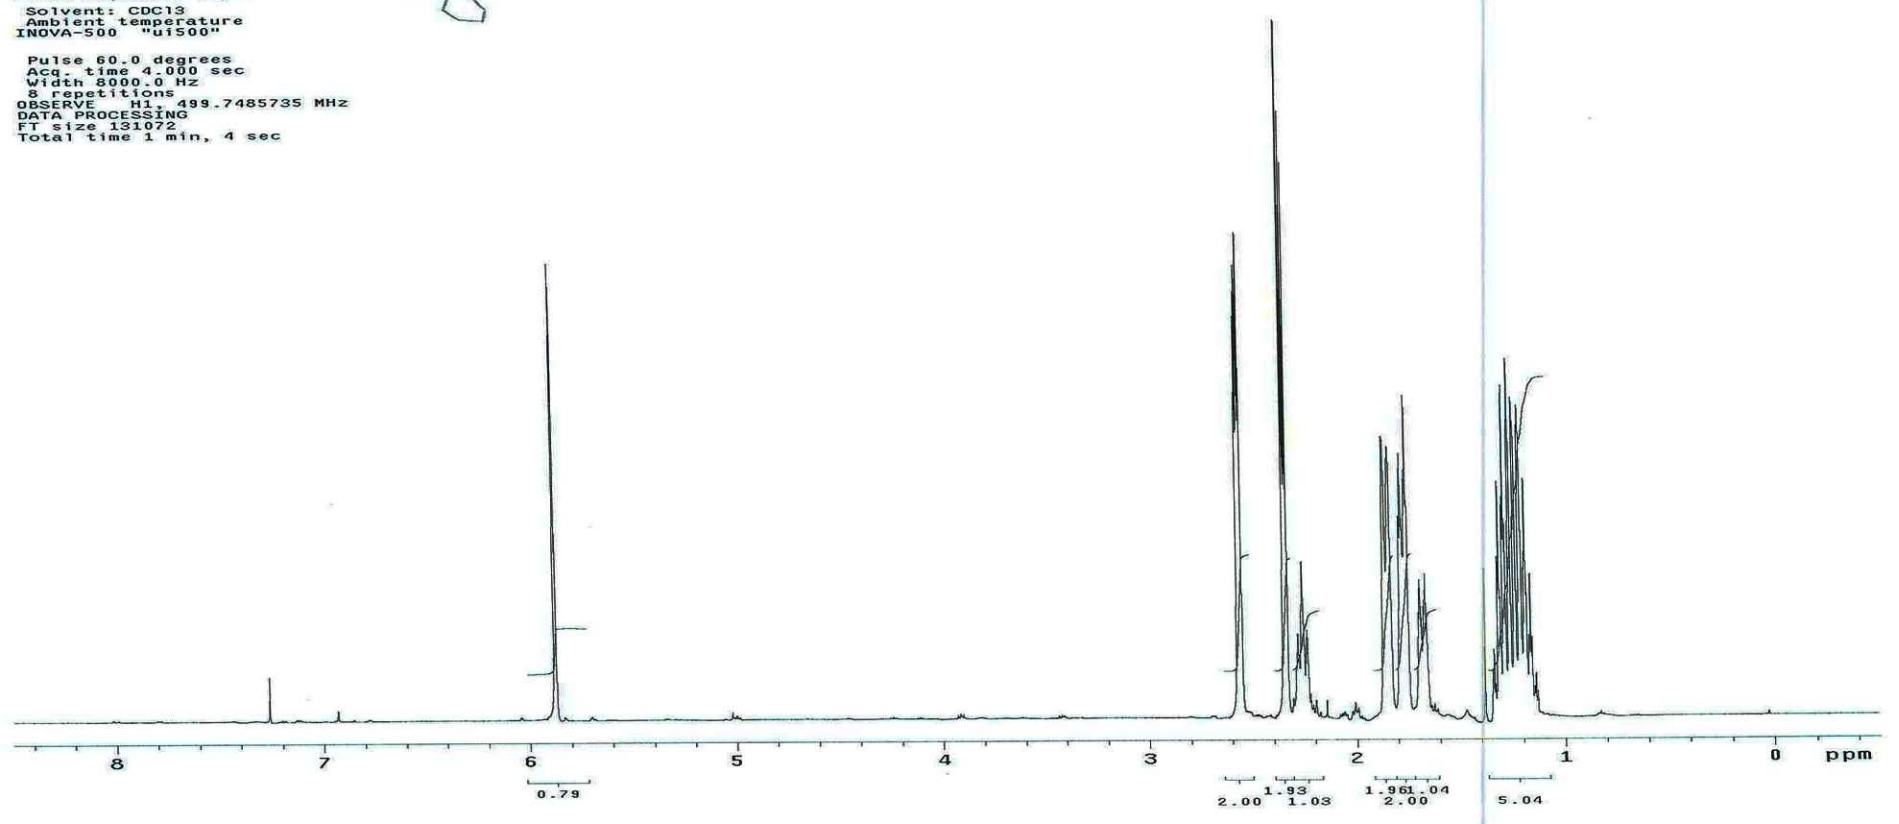

PERKIN ELMER

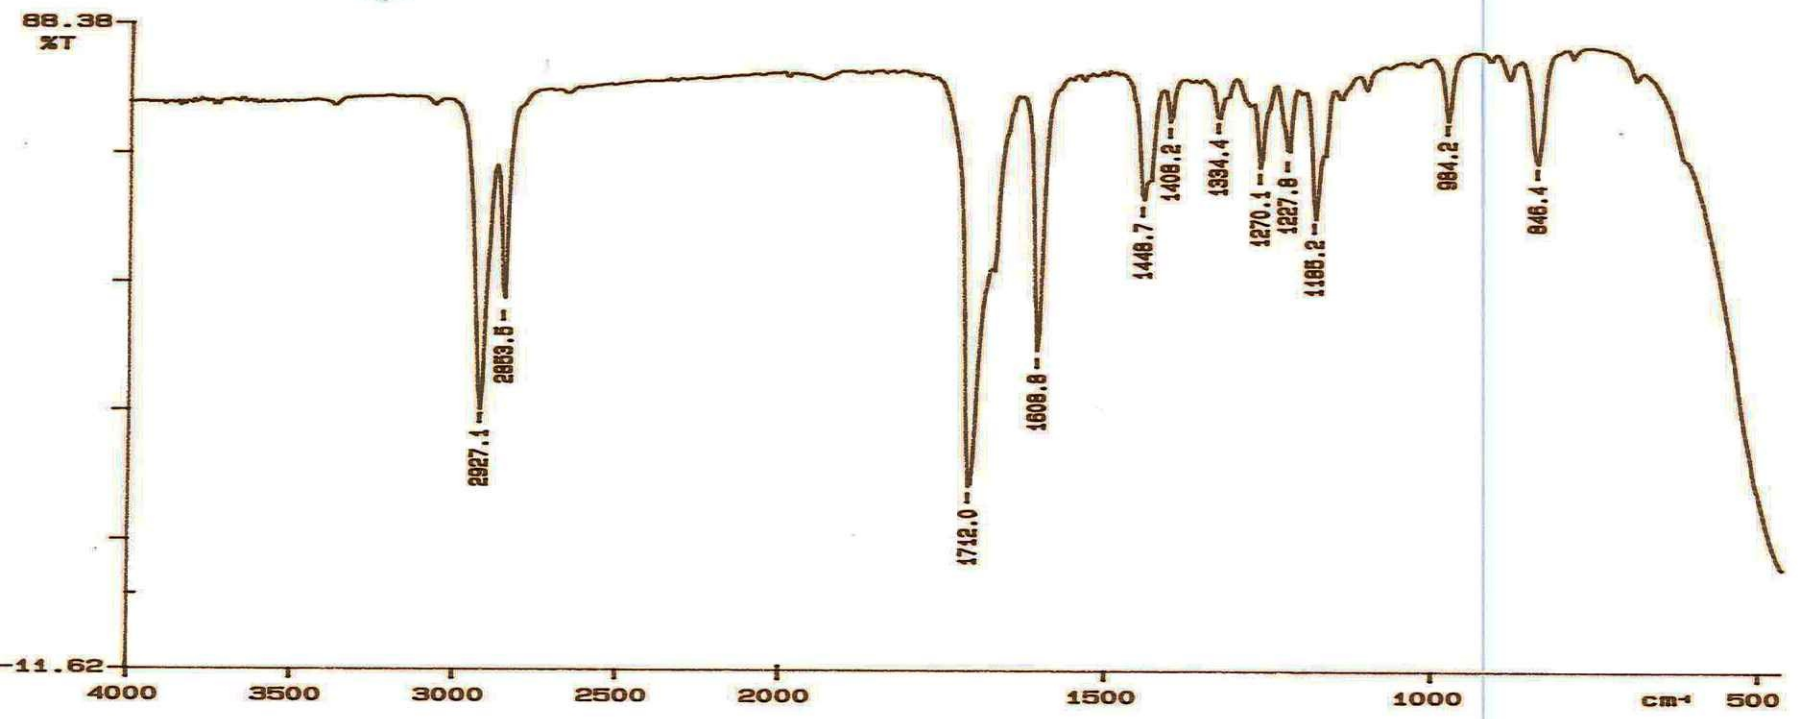

06/08/22 16:50  
 X: 4 scans, 4.0cm-1

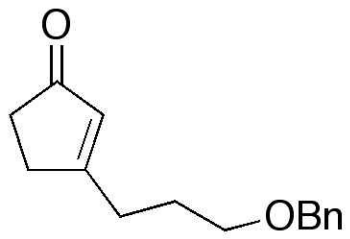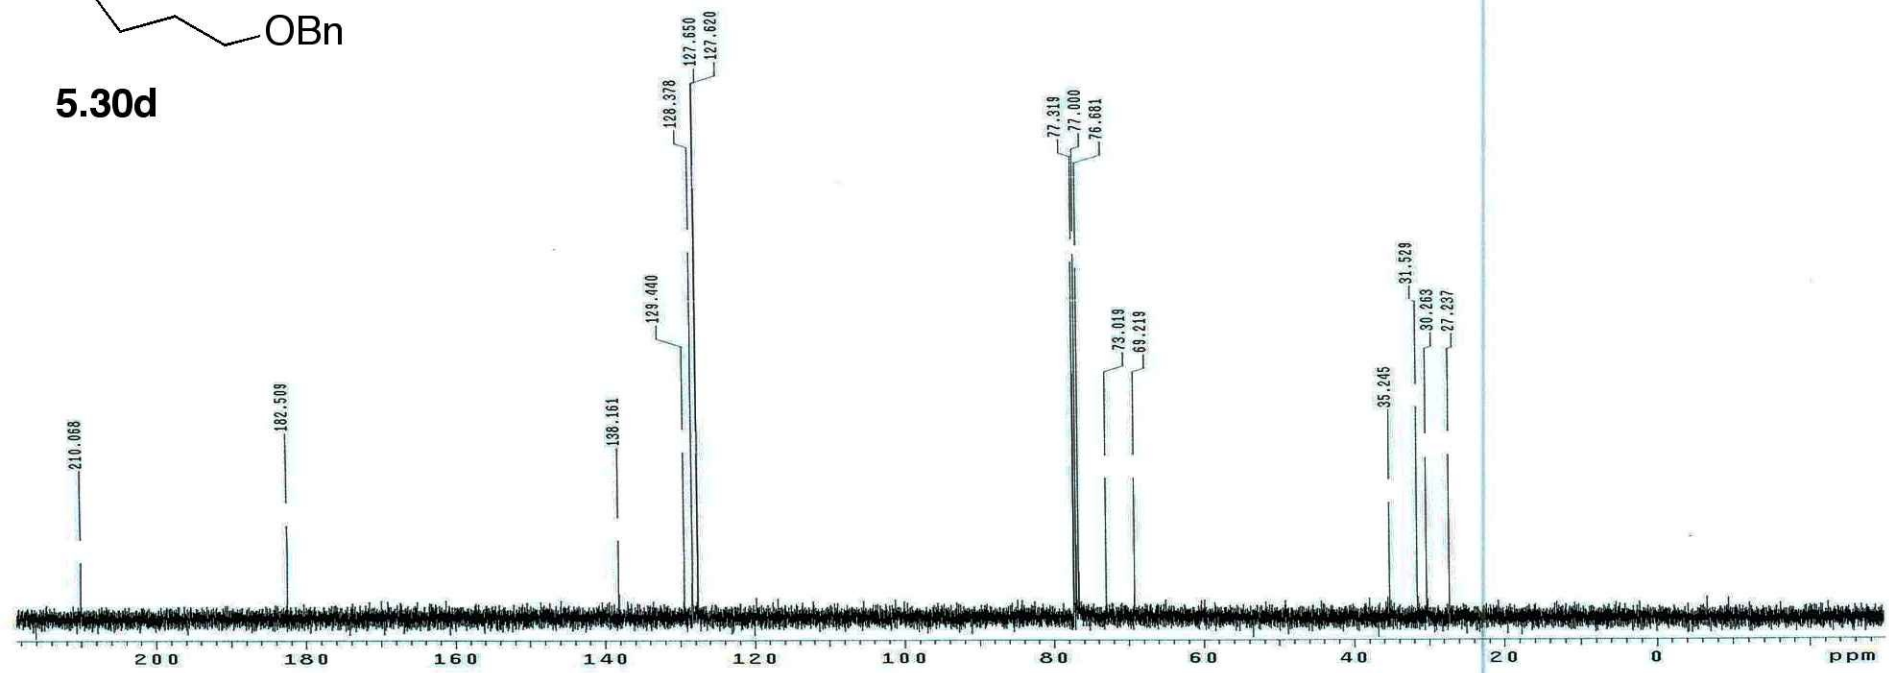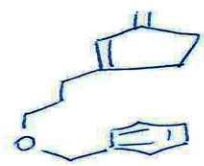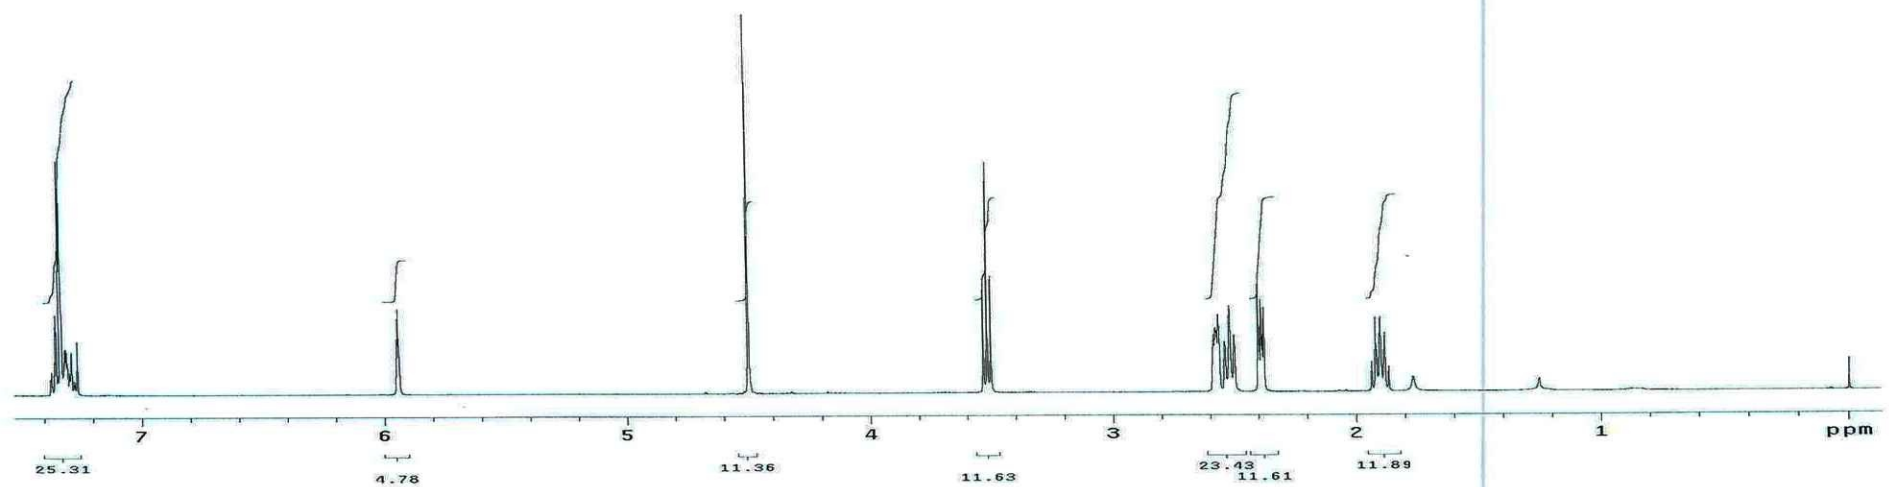

BnO

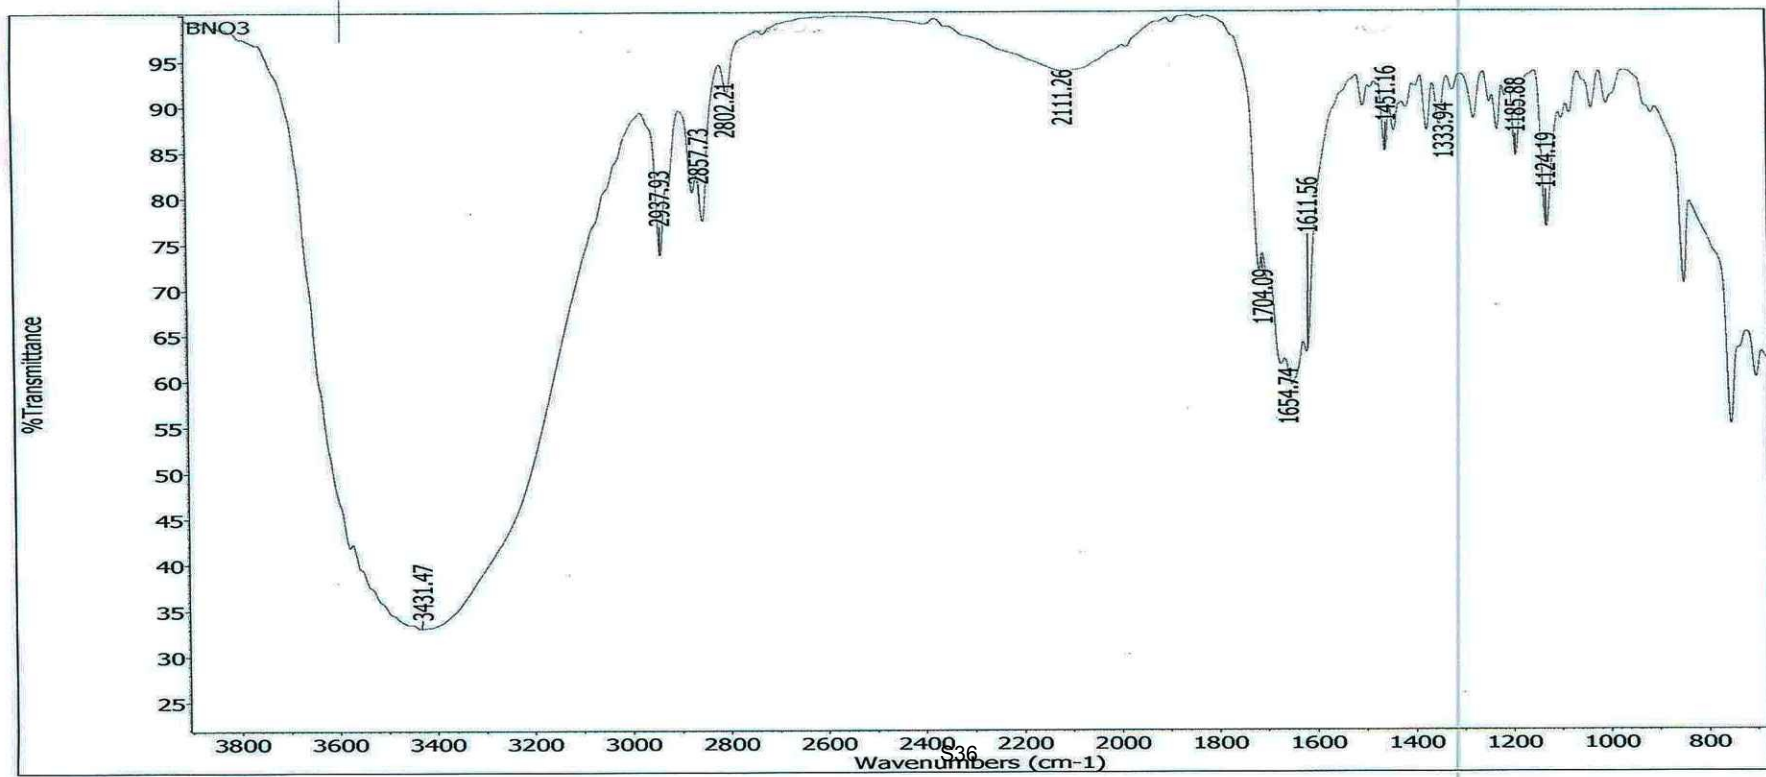



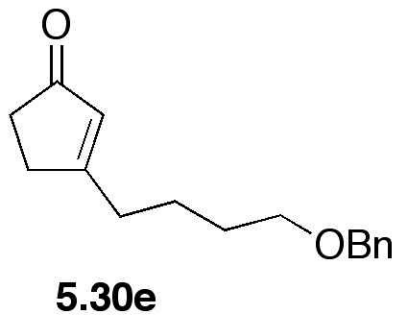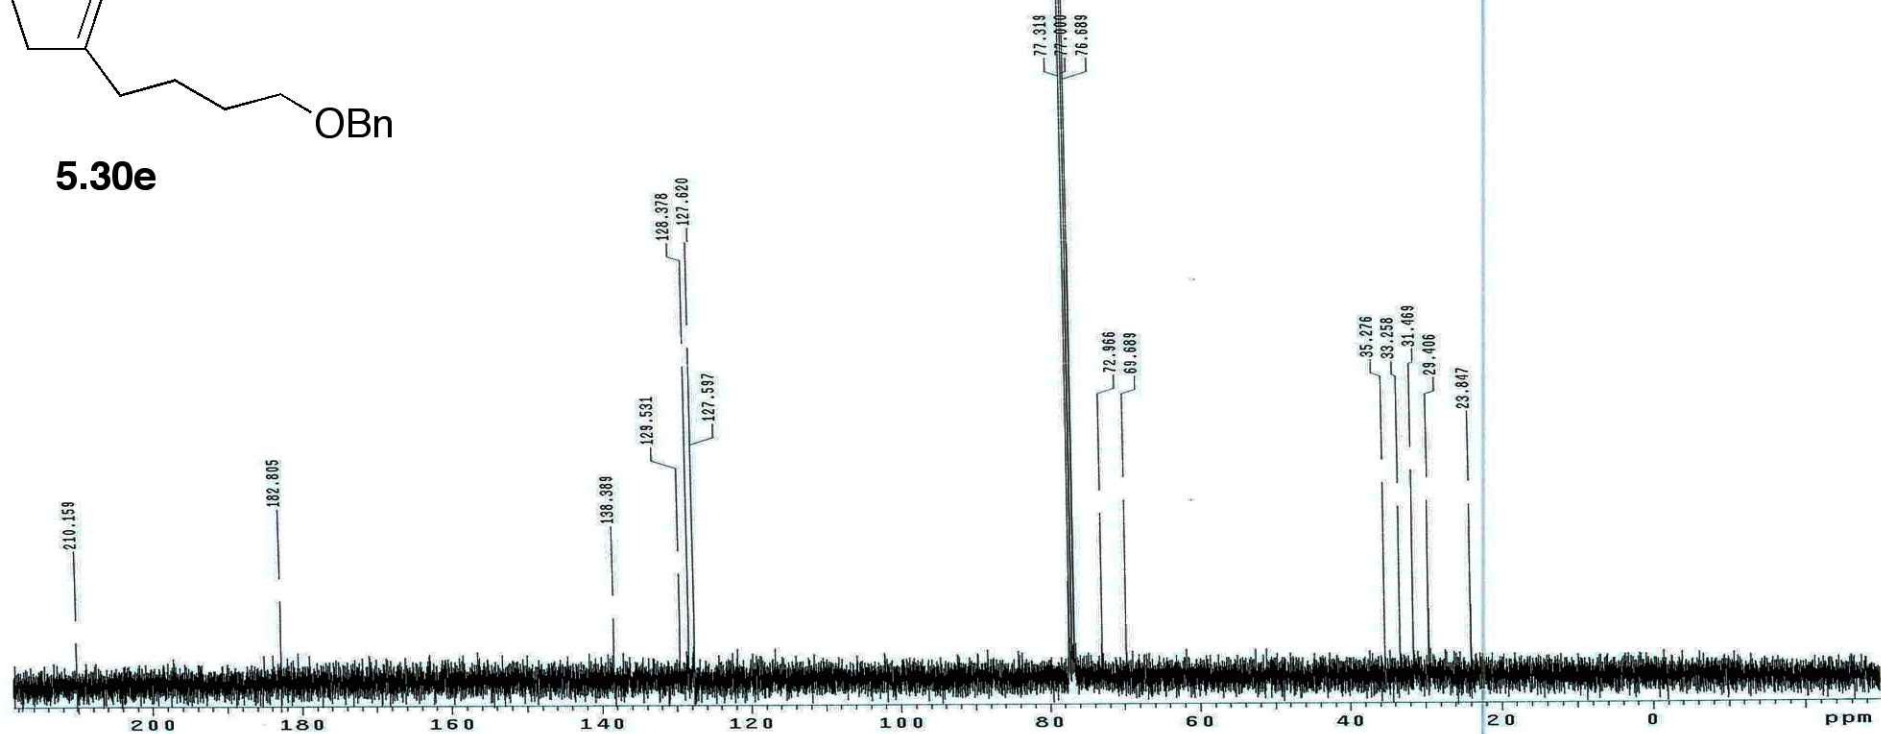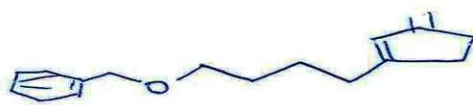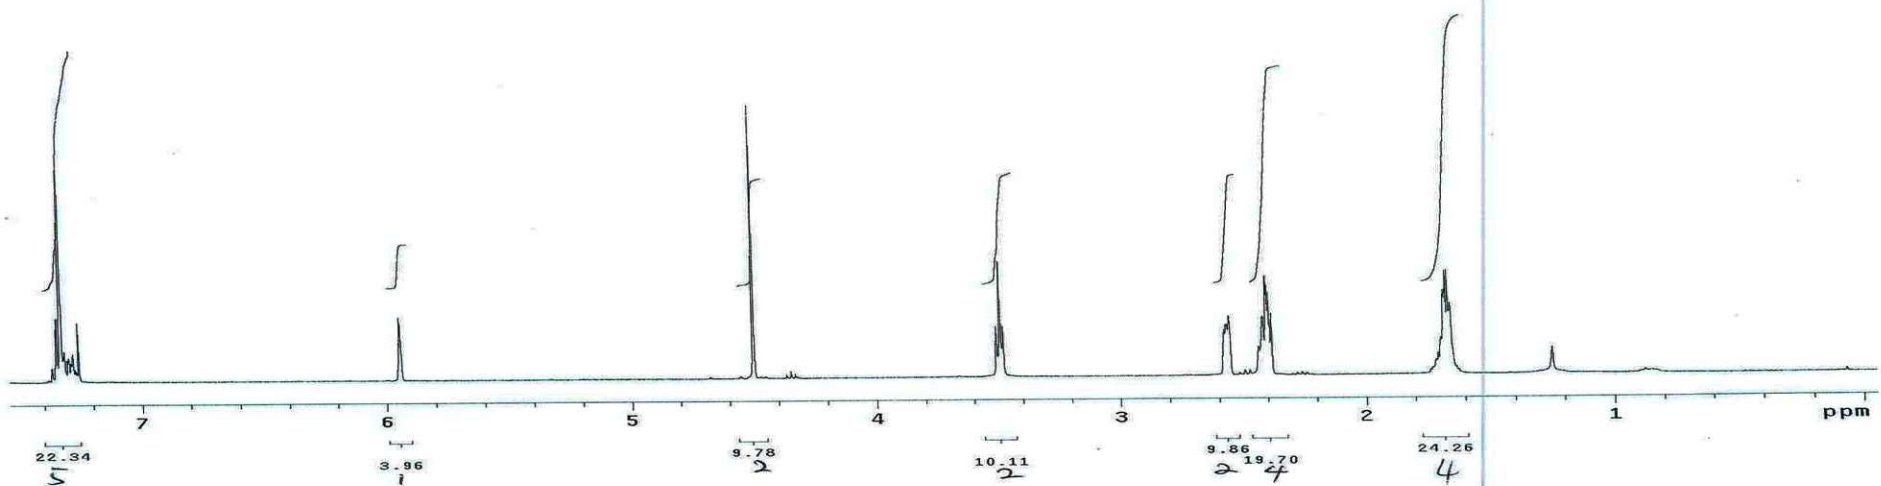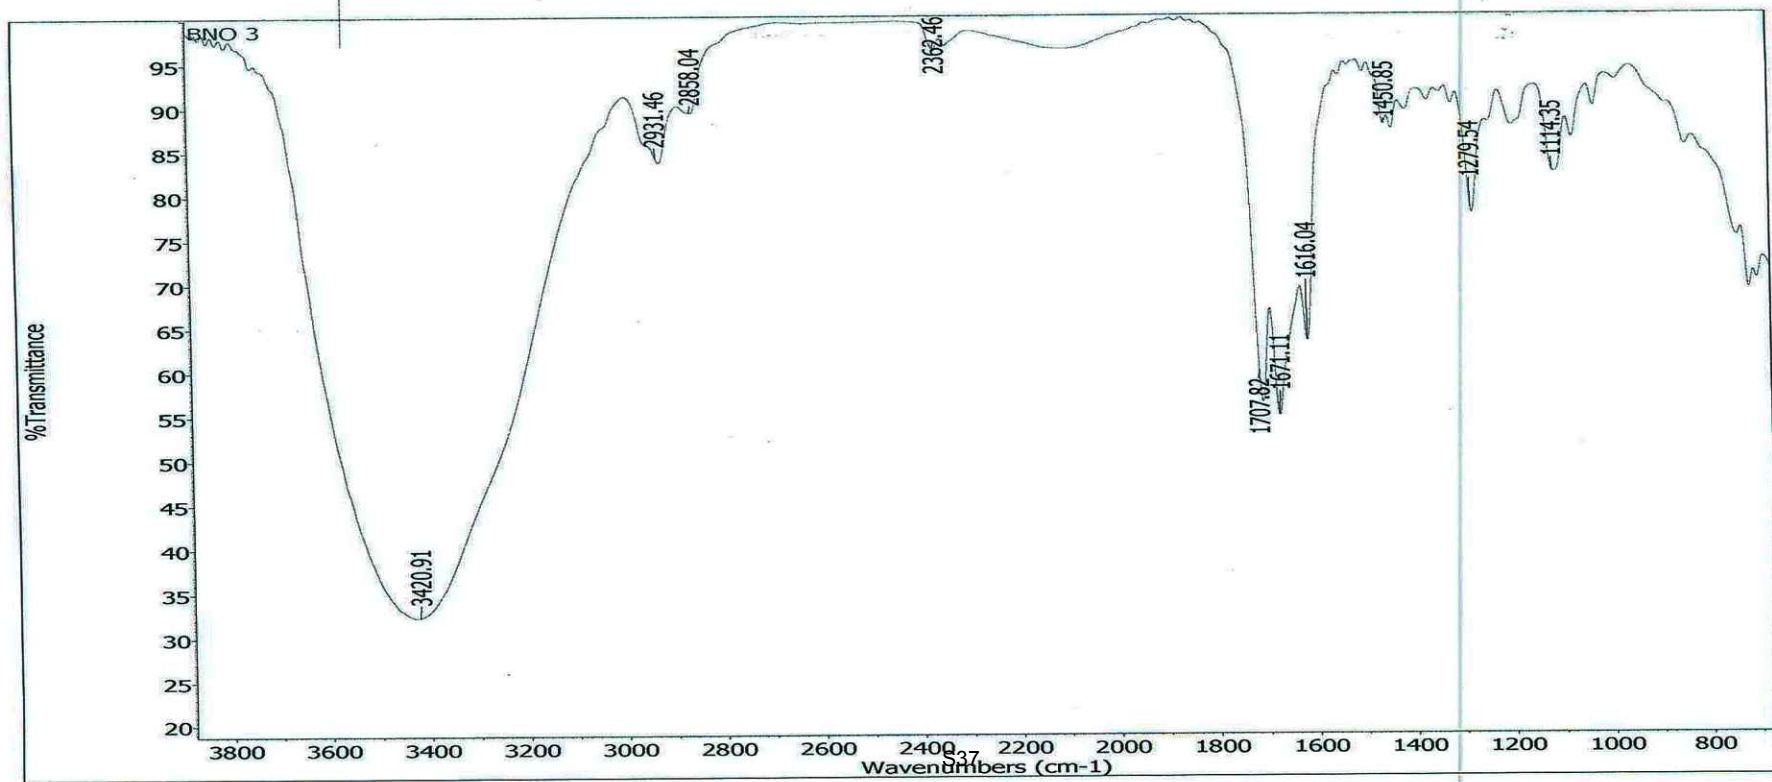

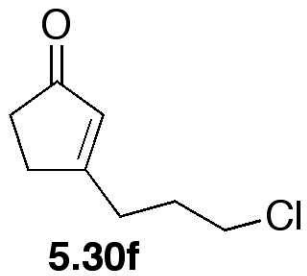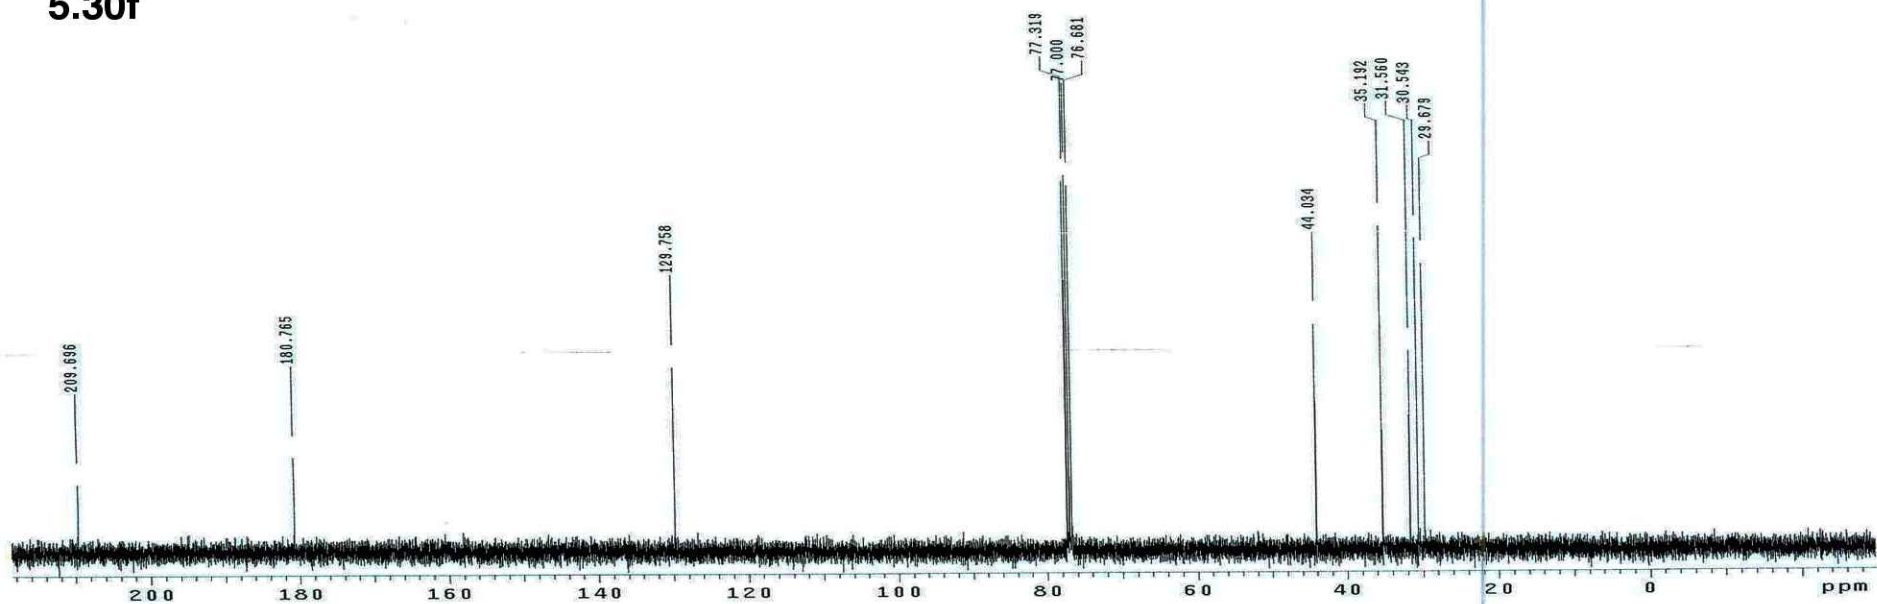

[CC 2005, 3030-3032]

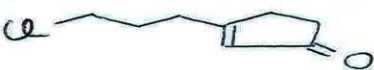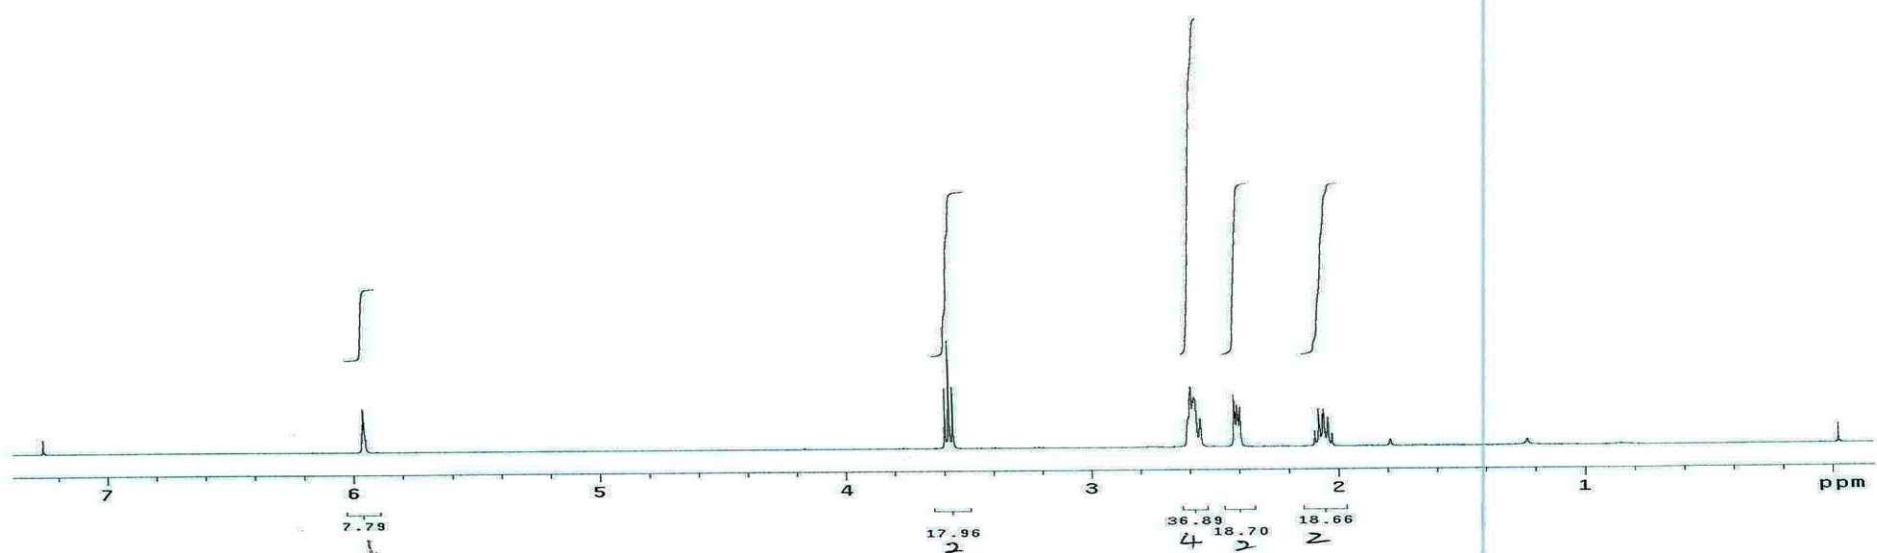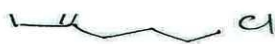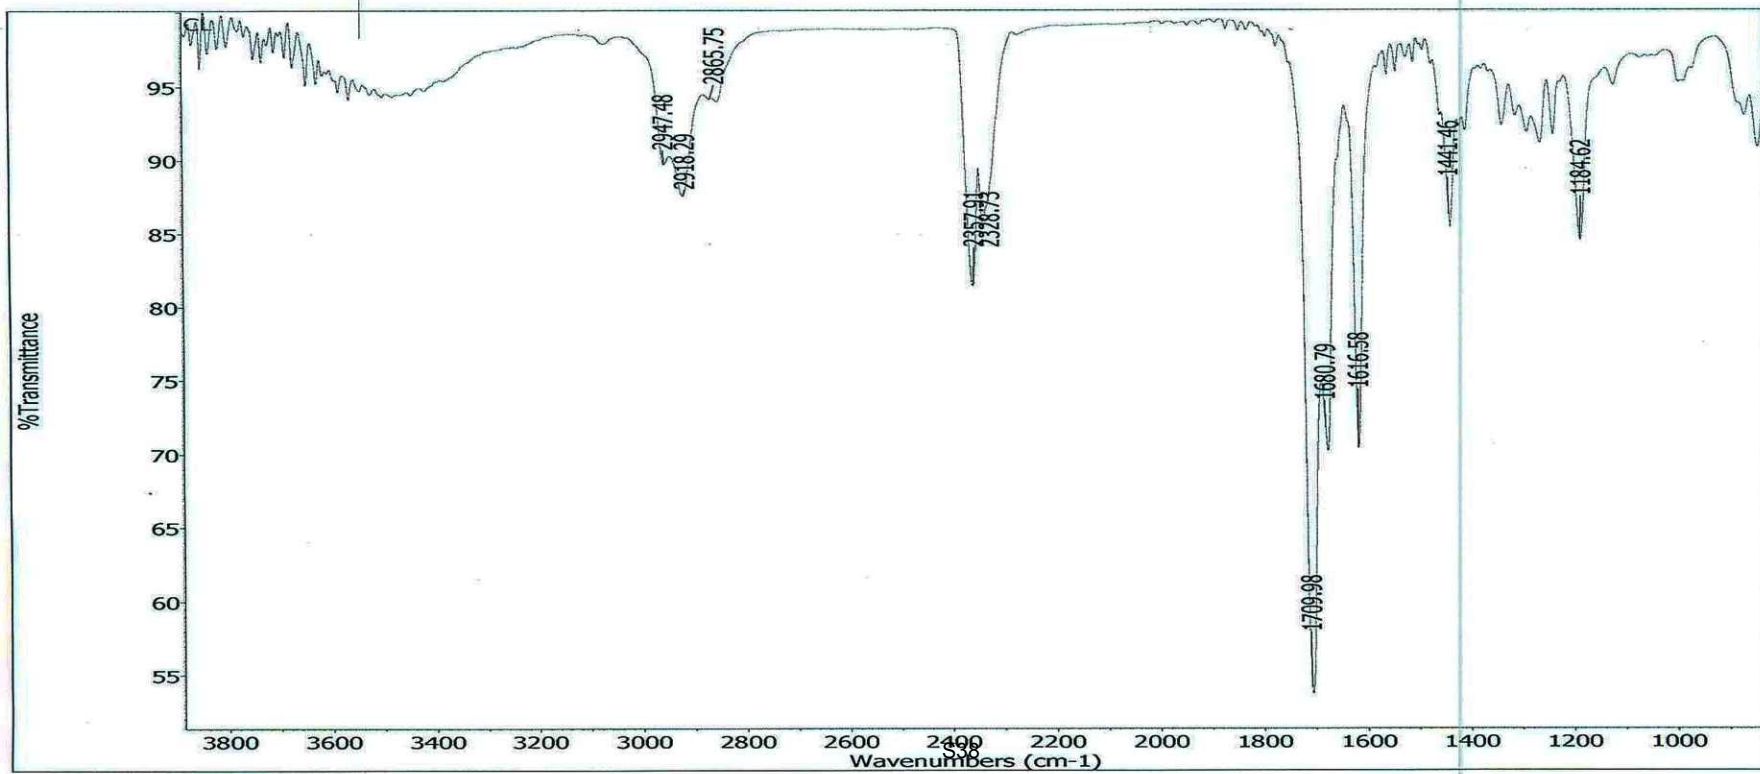

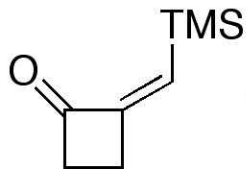

ec  
 8808 MHz  
 5605 MHz

5.32a

Hz

TOTAL TIME ON MATH AT SEC

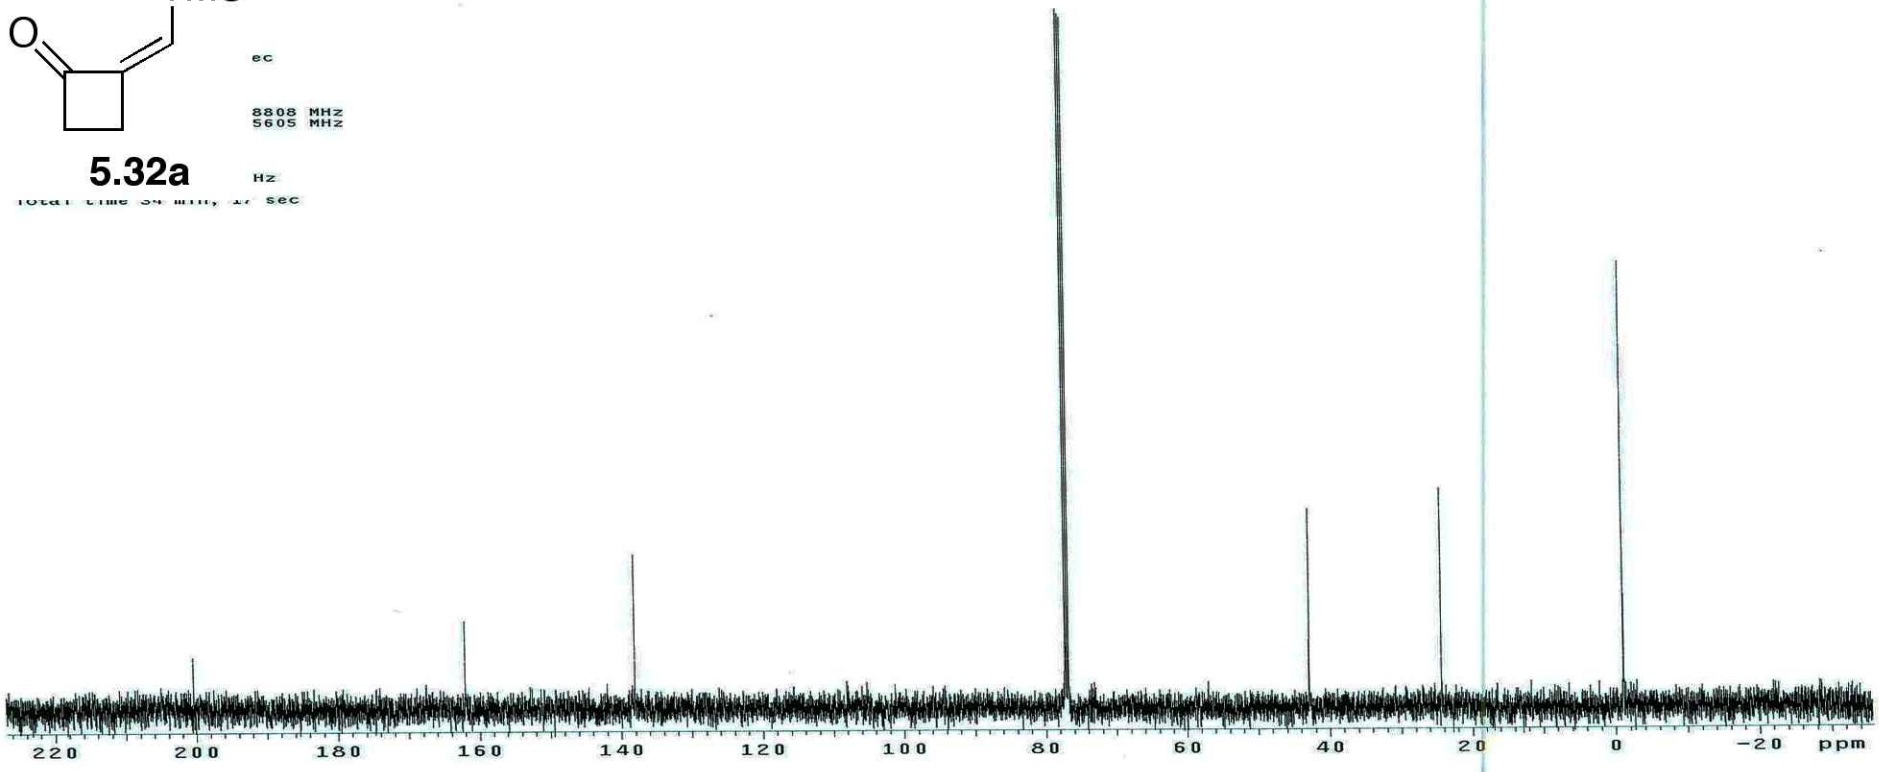

Pulse Sequence: s2pu1  
 Solvent: CDCl3  
 Ambient temperature  
 INOVA-500 "u1500"  
 Pulse 60.0 degrees  
 Acq. time 4.000 sec  
 Width 8000.0 Hz  
 8 repetitions  
 OBSERVE H1, 499.7485737 MHz  
 DATA PROCESSING  
 FT size 131072  
 Total time 1 min, 4 sec

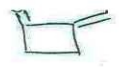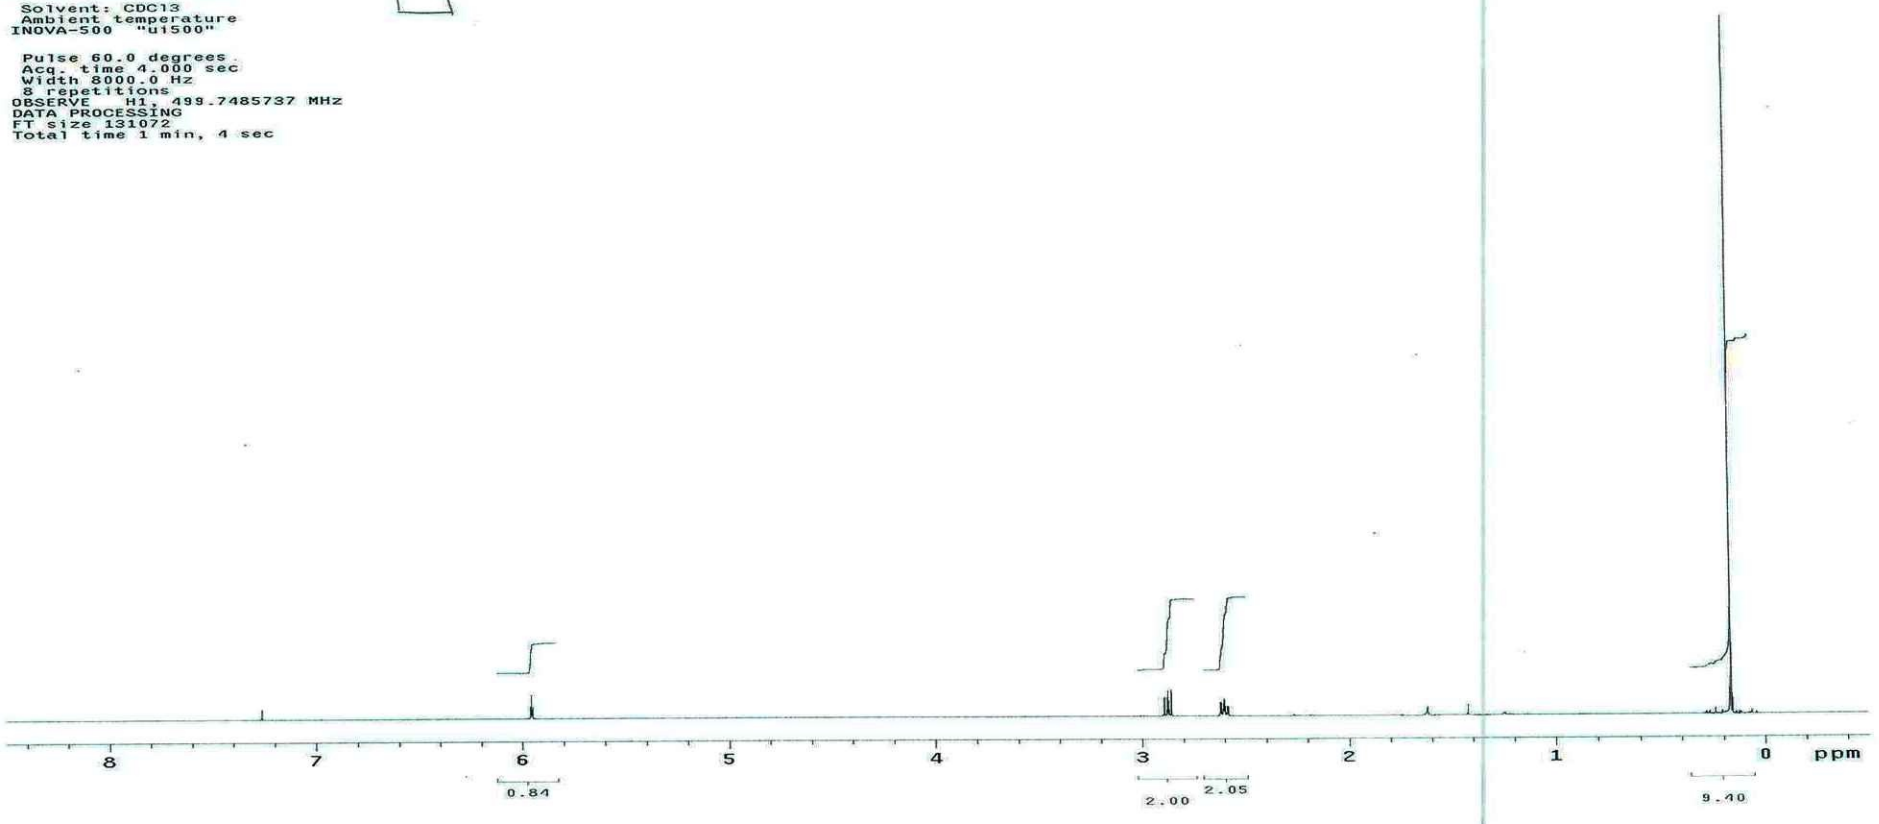

PERKIN ELMER

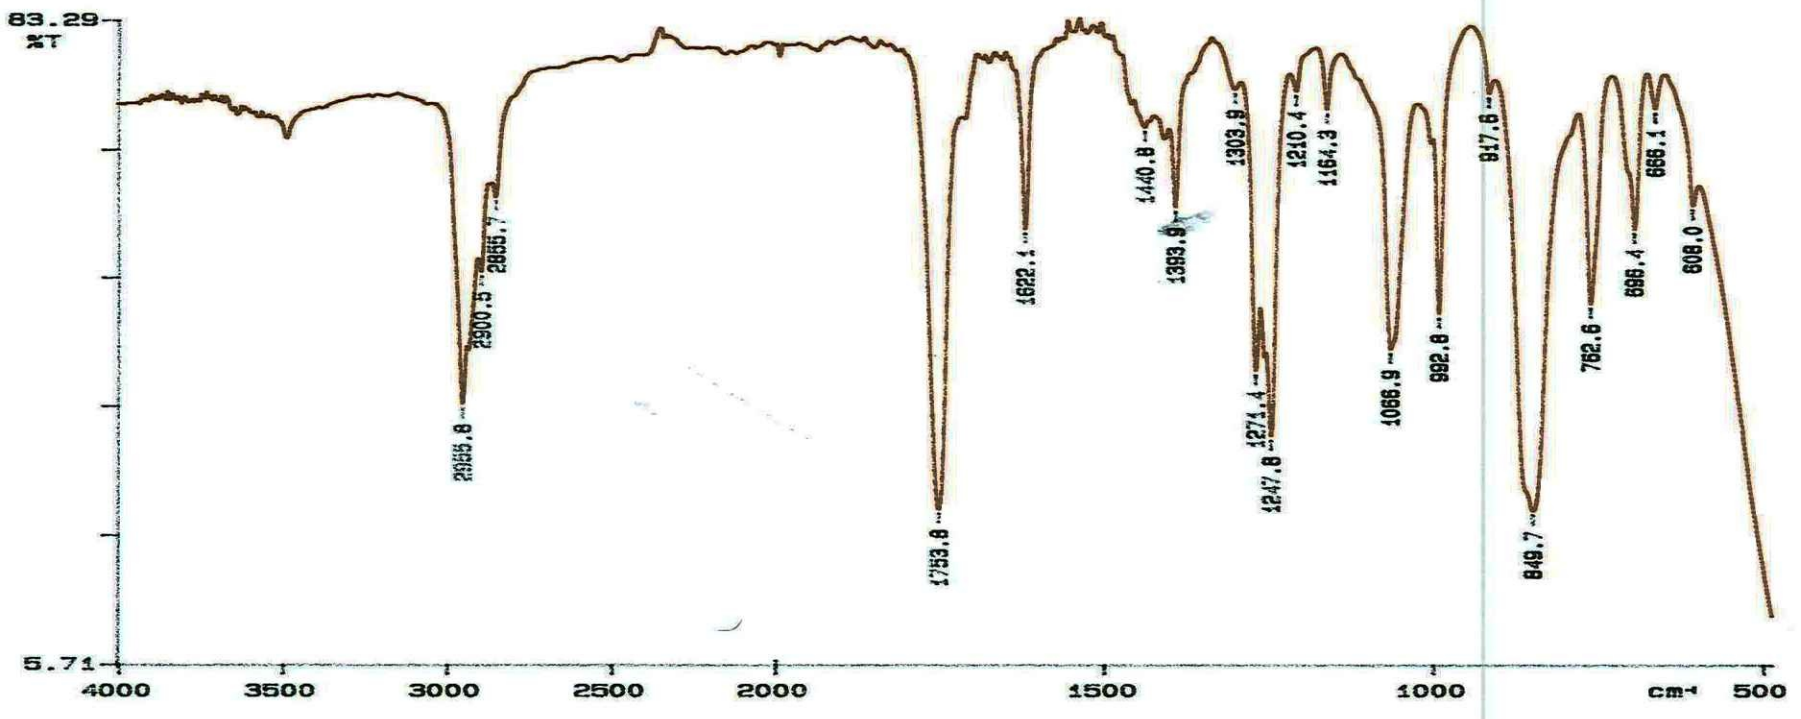

06/07/27 12:17  
 X: 4 scans, 4.0cm-1



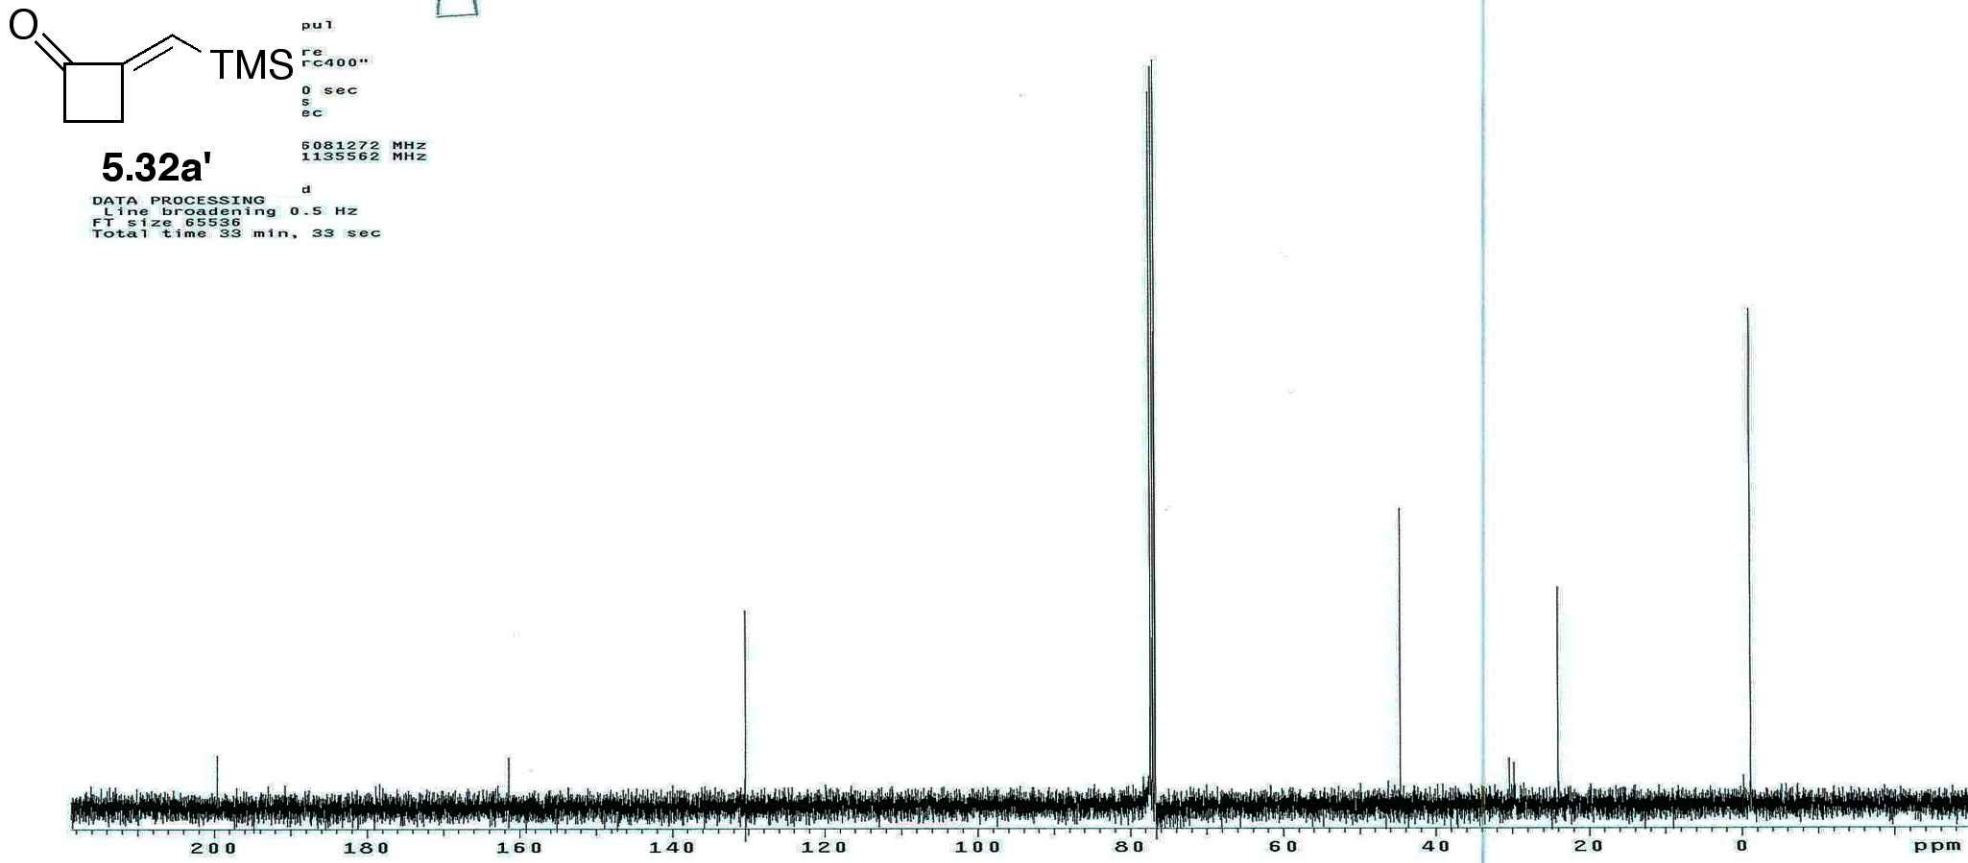

Pulse Sequence: s2pul  
Solvent: CDCl3  
Ambient temperature  
INOVA-500 "uis500"

Pulse 60.0 degrees  
Acq. time 4.000 sec  
Width 2000.0 Hz  
8 repetitions  
OBSERVE H1: 499.7485735 MHz  
DATA PROCESSING  
FT size 131072  
Total time 1 min, 4 sec

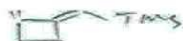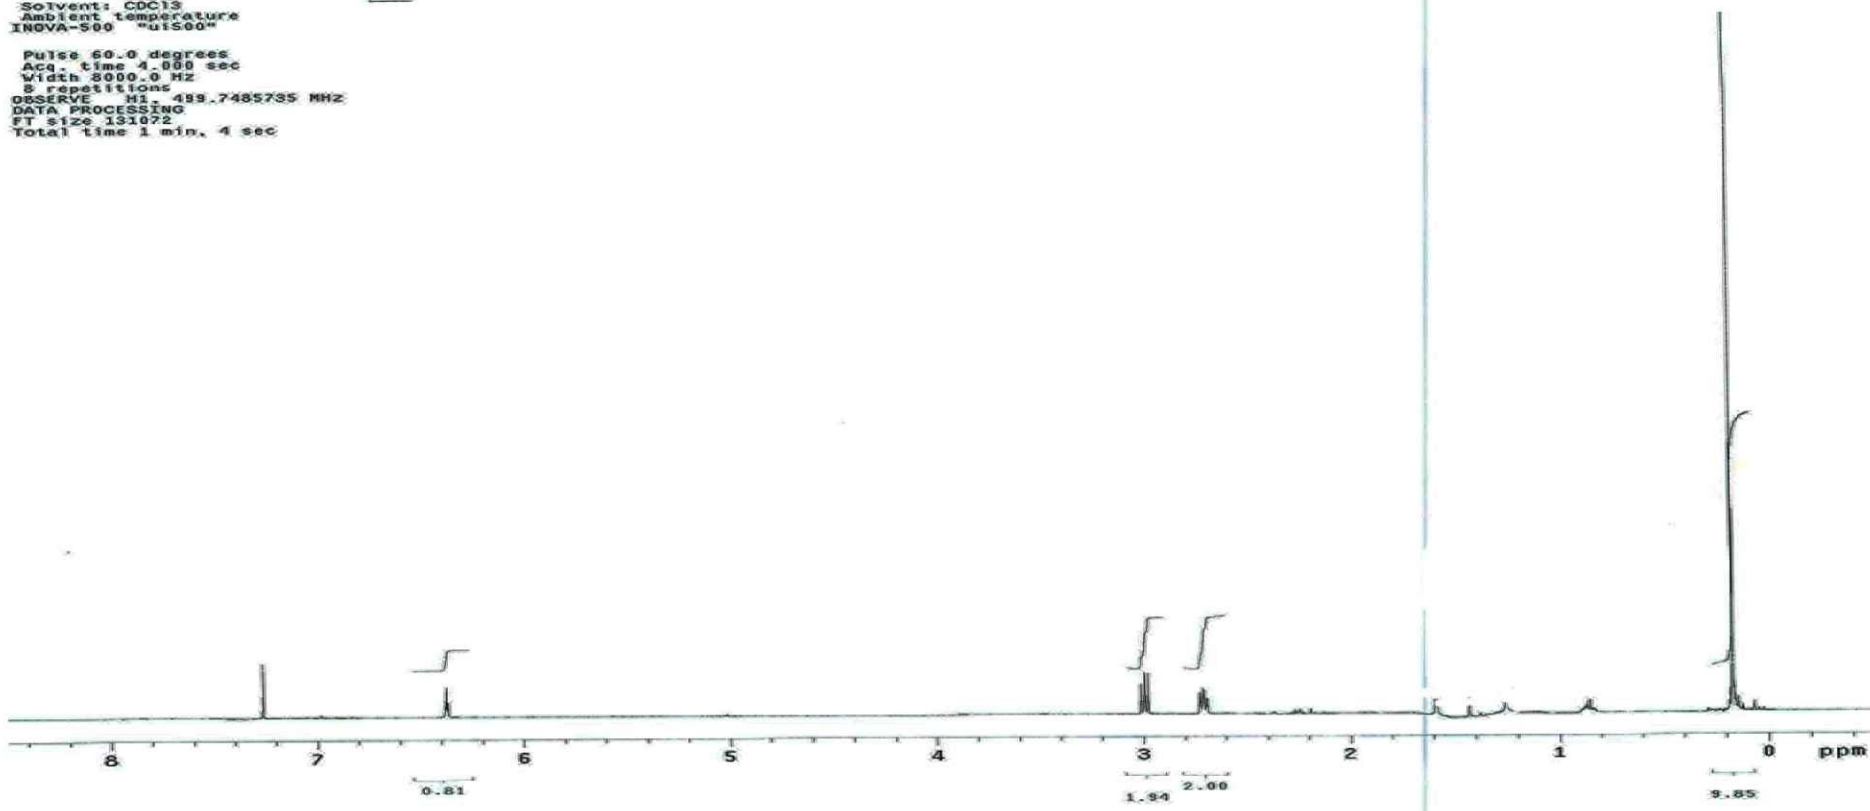

PERKIN ELMER

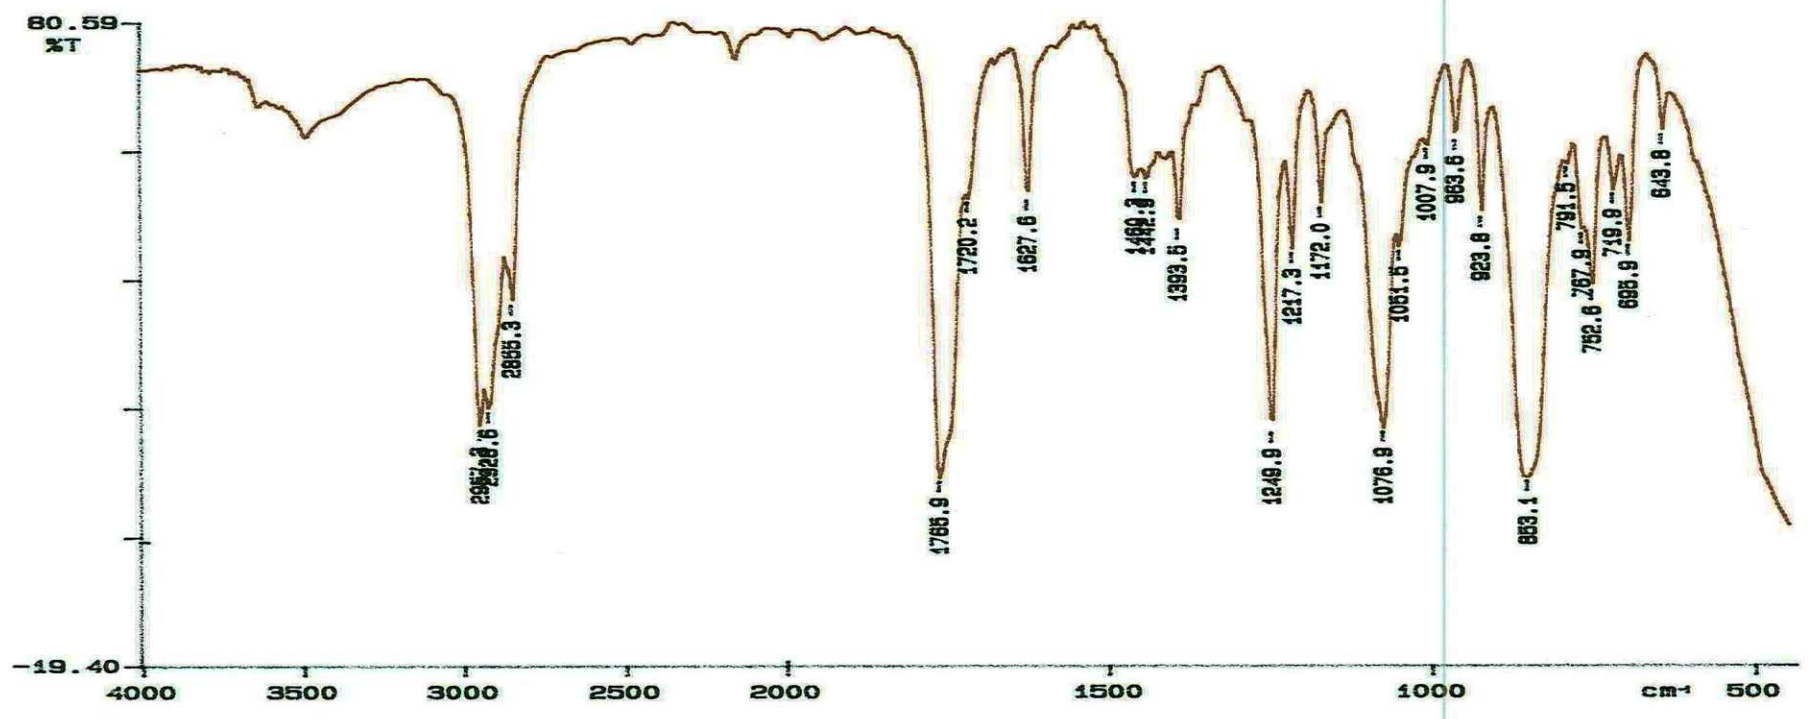

06/07/27 12:22  
X: 4 scans, 4.0cm-1

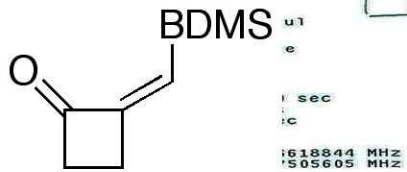

5.32b

u1  
e  
1 sec  
ic  
1618844 MHz  
1505605 MHz  
1  
0 Hz  
17 sec

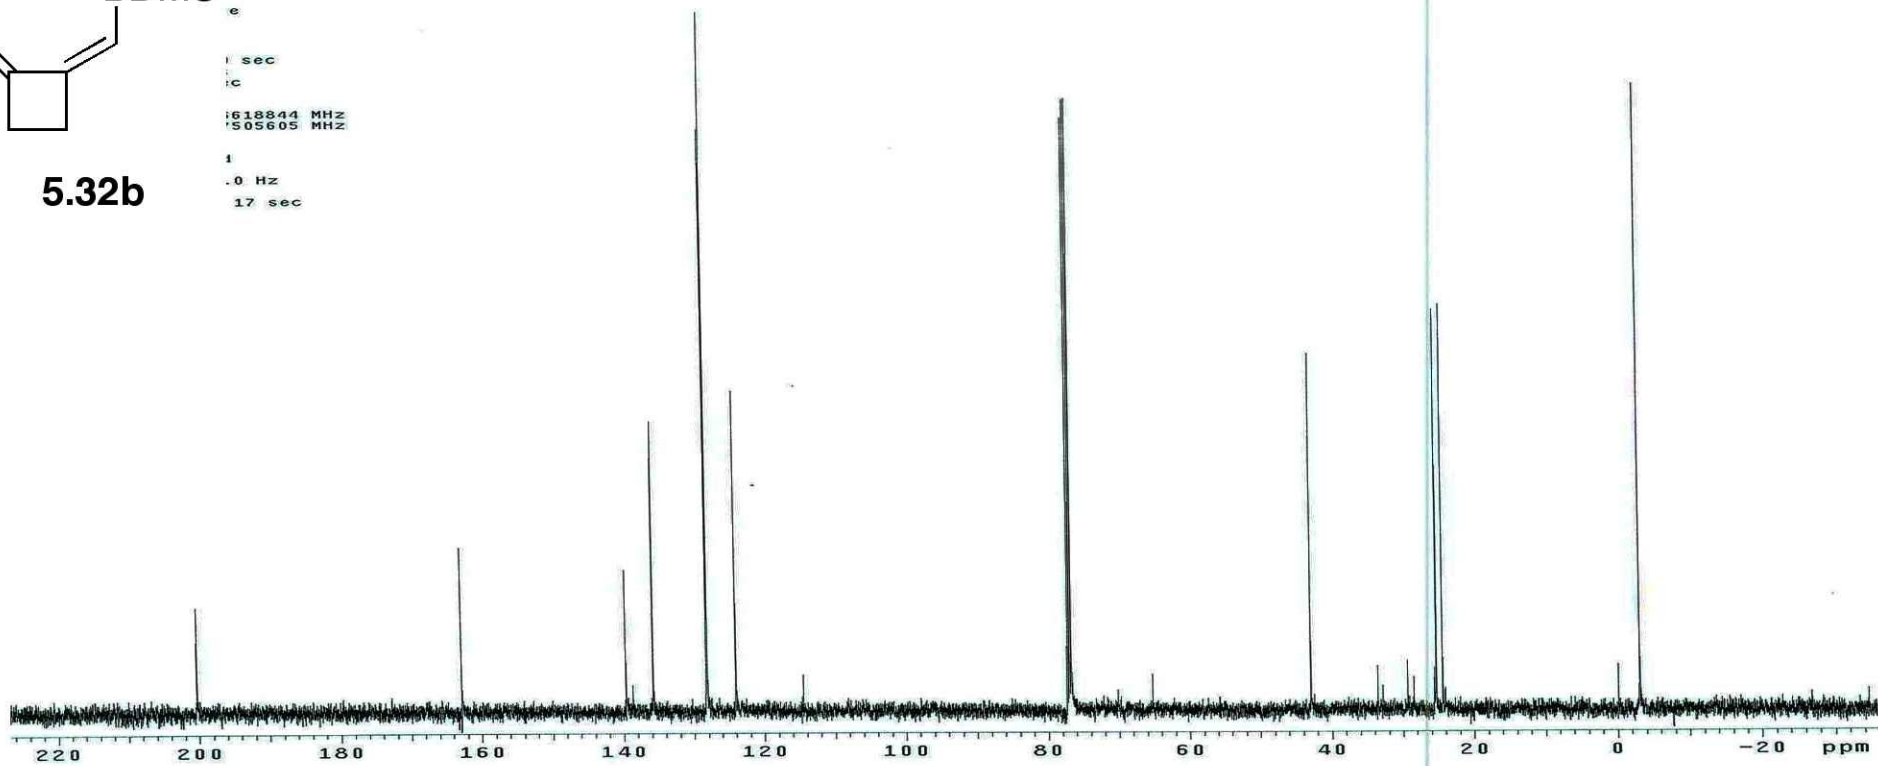

JX-XV-83-1  
Pulse Sequence: s2pu1  
Solvent: CDCl3  
Ambient temperature  
INNOVA-500 "ui500"  
Pulse 60.0 degrees  
Acq. time 4.000 sec  
Width 8000.0 Hz  
3 repetitions  
OBSERVE H1, 499.7485737 MHz  
DATA PROCESSING  
FT size 131072  
Total time 1 min, 4 sec

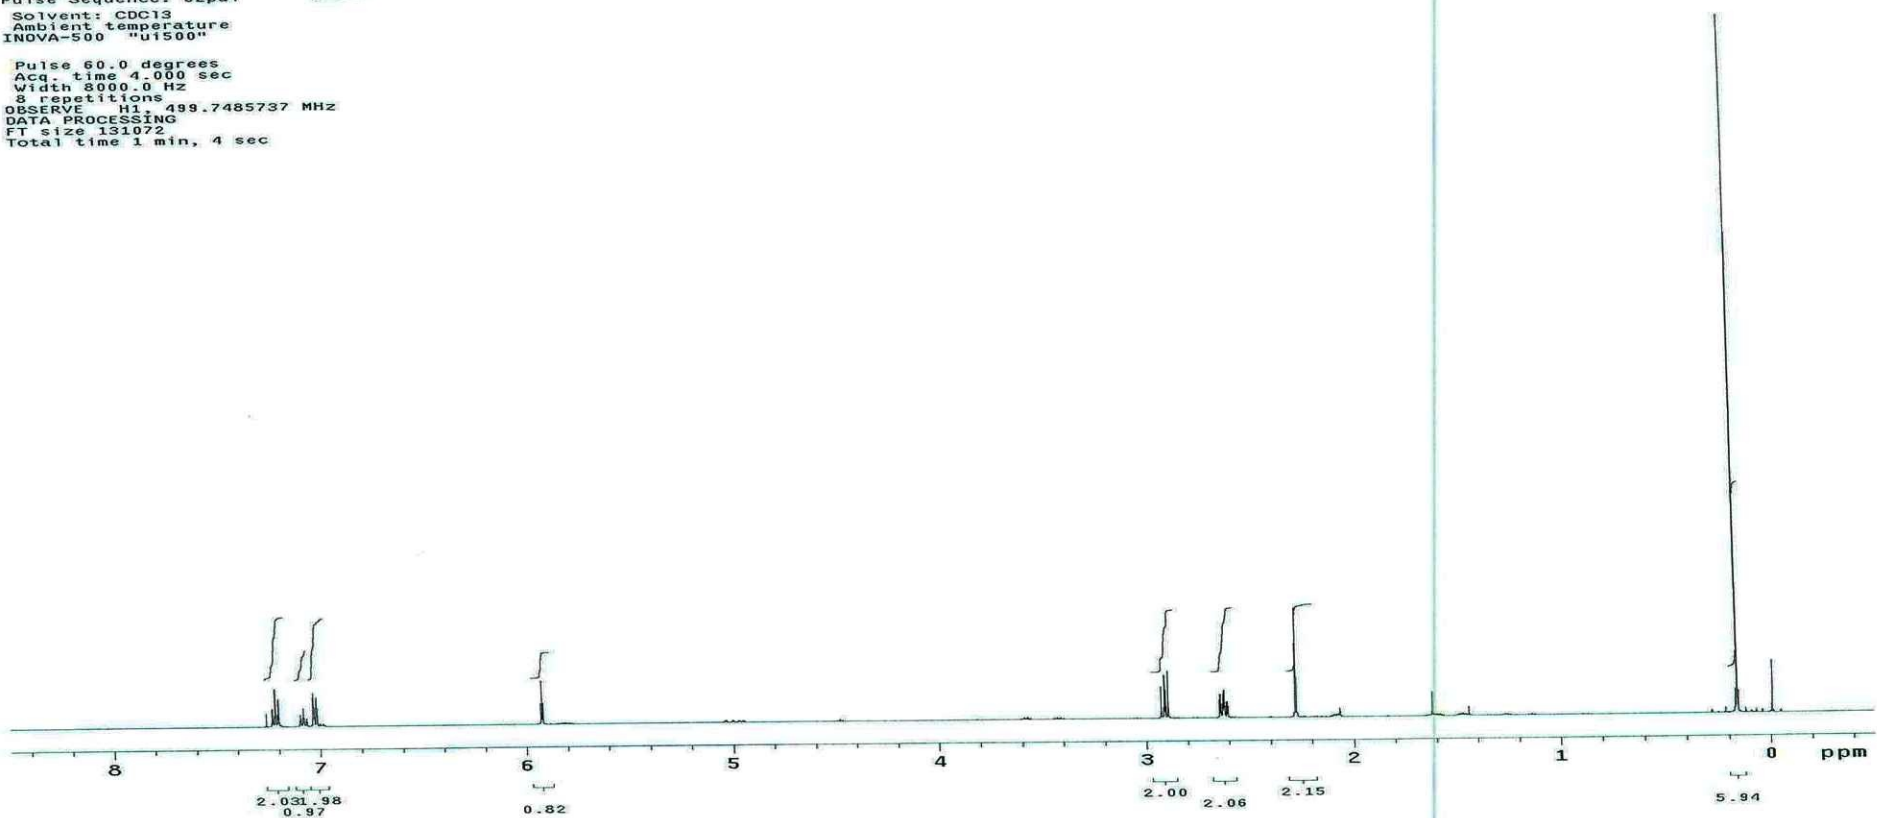

PERKIN ELMER

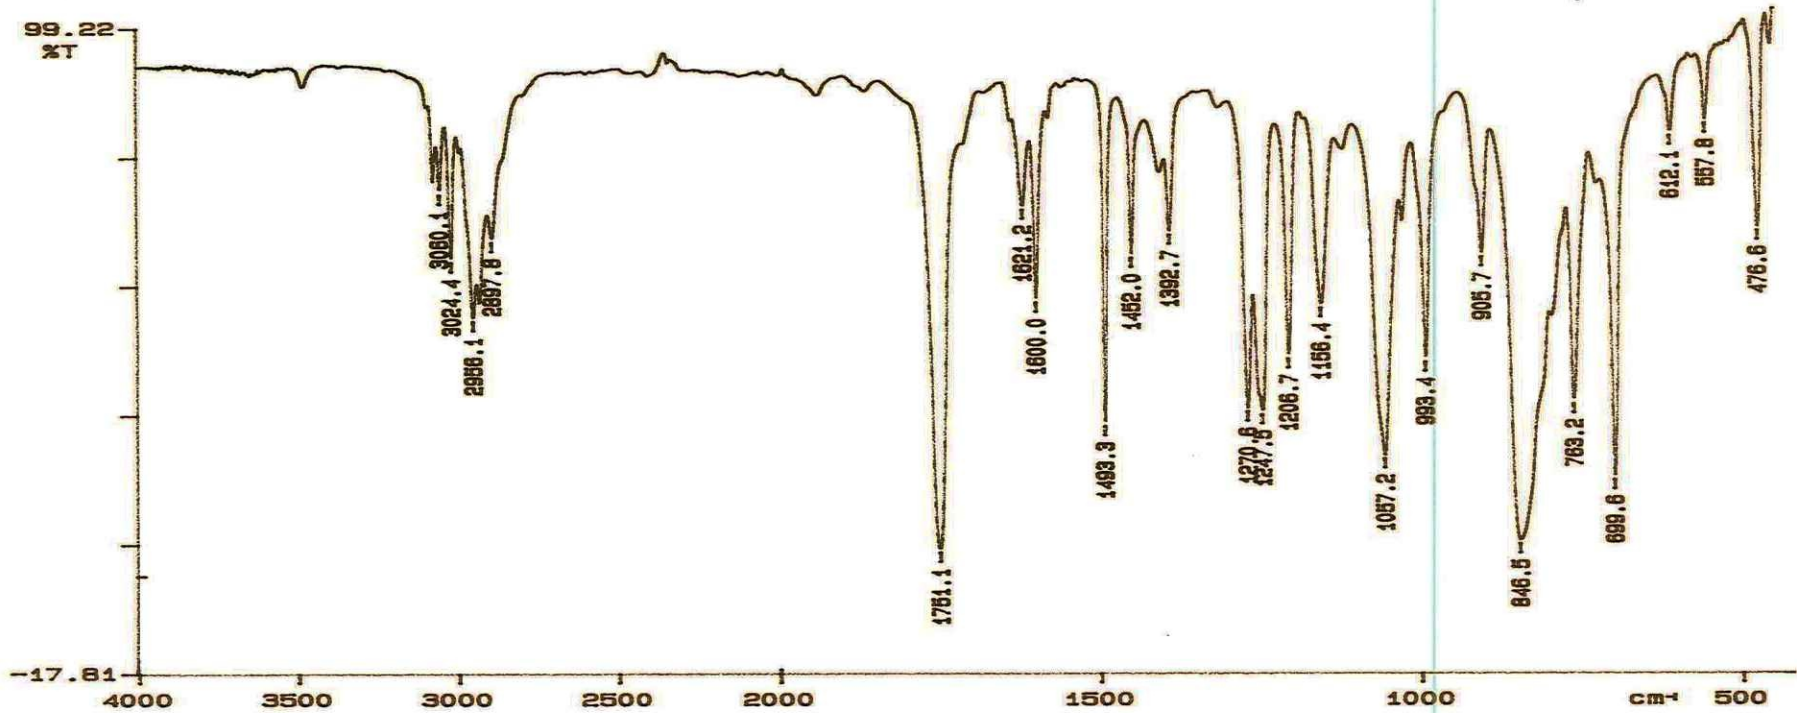

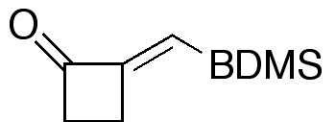

5.32b'

13 MHz  
05 MHz

WALTZ-16 modulated  
DATA PROCESSING  
Line broadening 2.0 Hz  
FT size 131072  
Total time 34 min, 17 sec

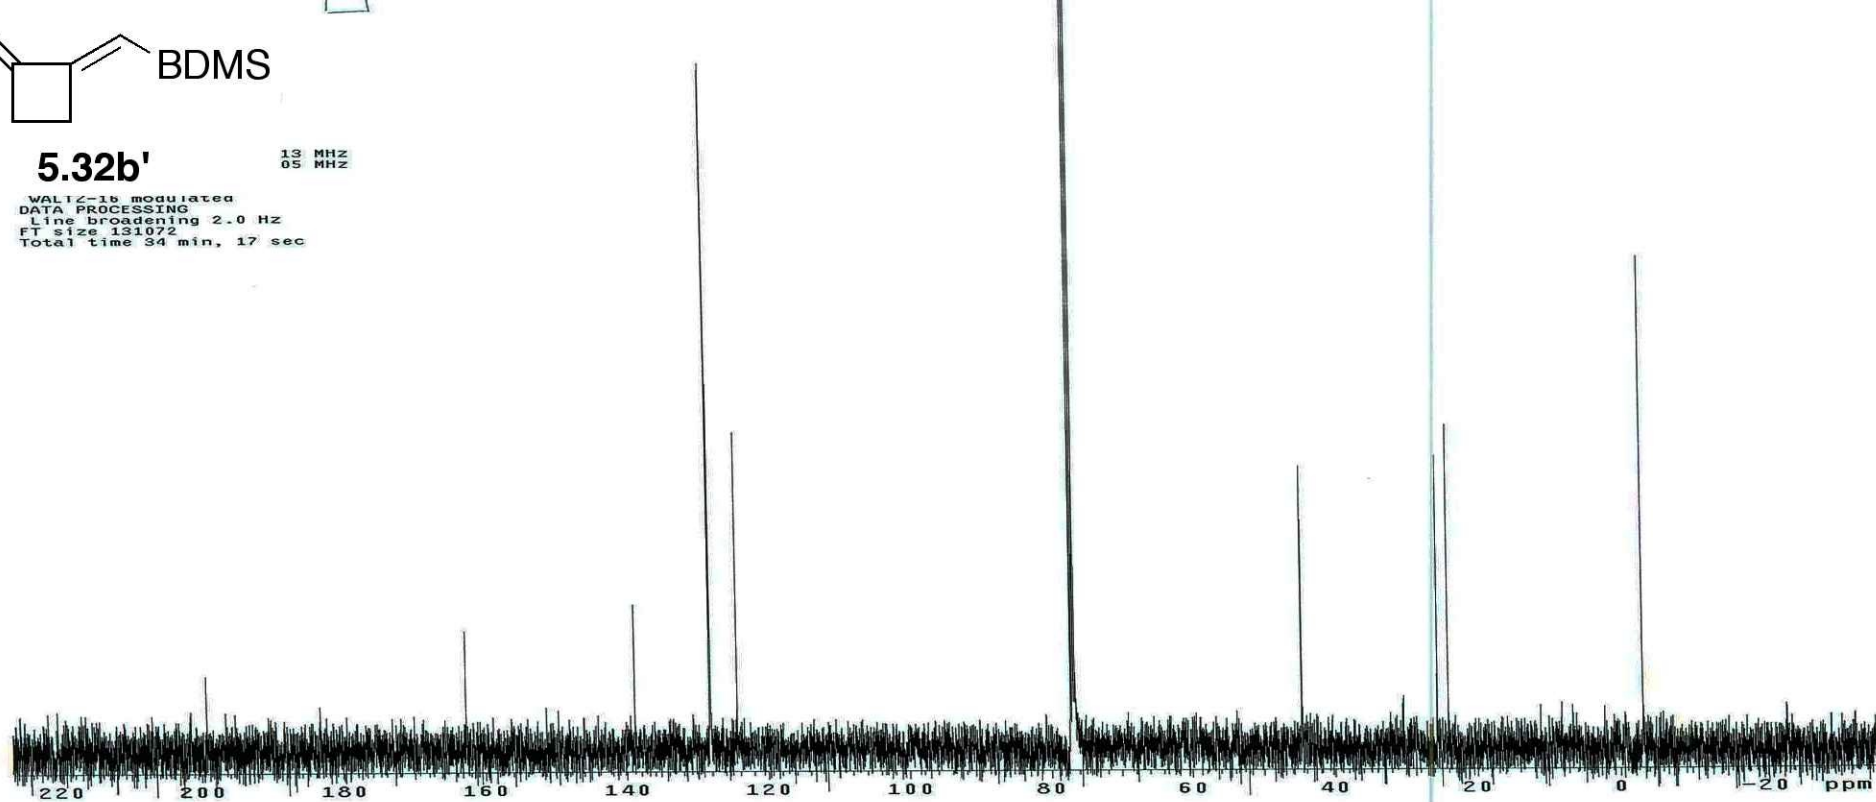

JX-XV-83-2

Pulse Sequence: s2pu1  
Solvent: CDCl3  
Ambient temperature  
INOVA-500 "u1500"

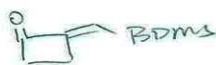

Pulse 60.0 degrees  
 Acq. time 4.000 sec  
 Width 8000.0 Hz  
 8 repetitions  
 OBSERVE H1, 499.7485738 MHz  
 DATA PROCESSING  
 FT size 131072  
 Total time 1 min, 4 sec

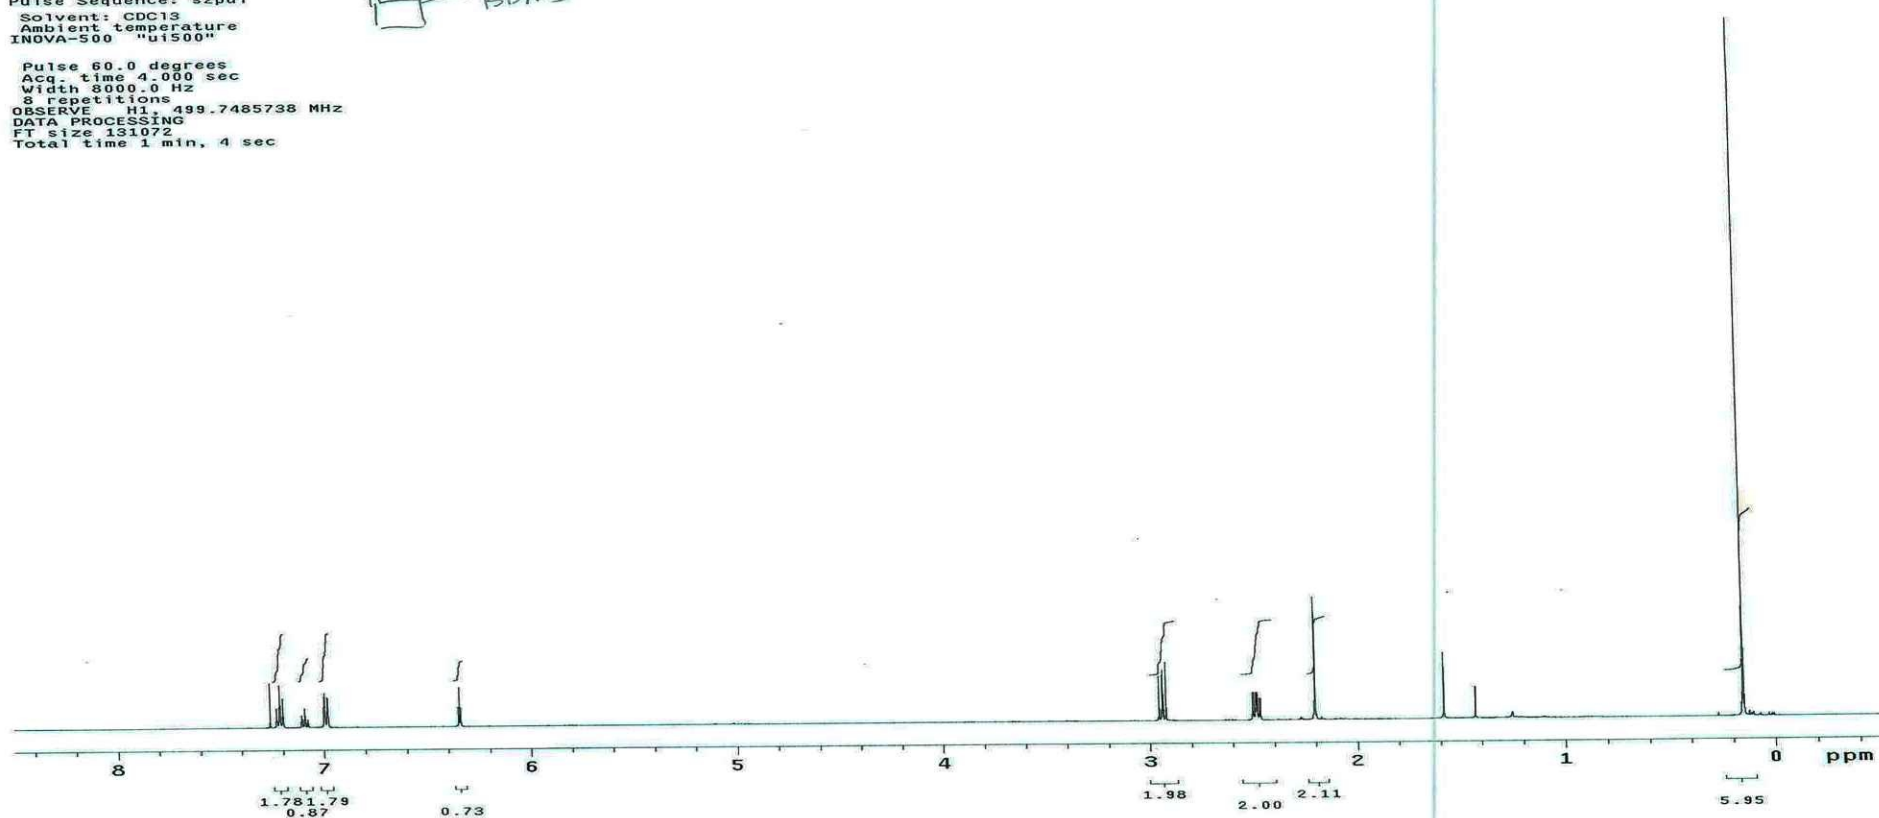

PERKIN ELMER

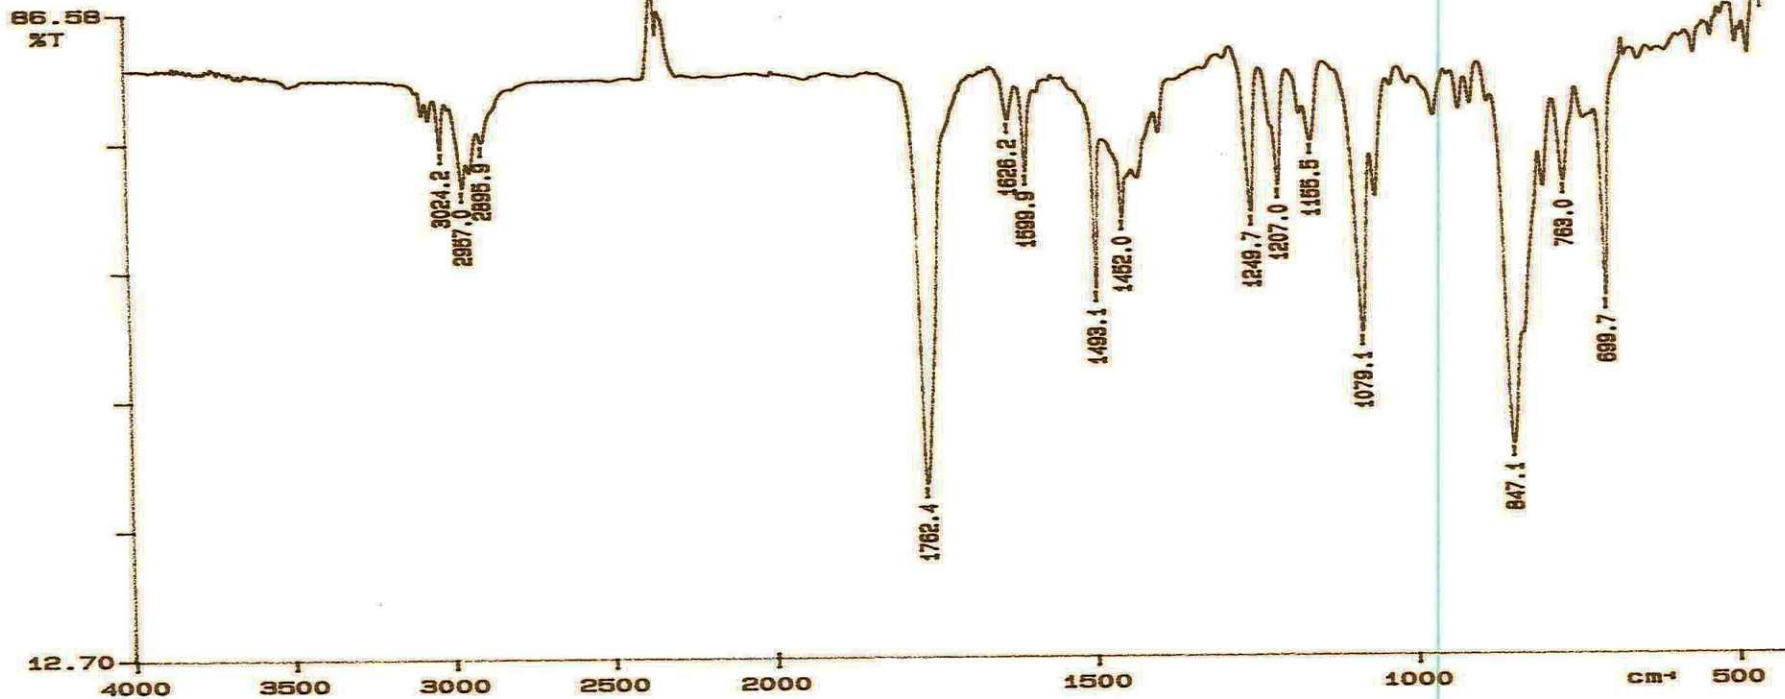



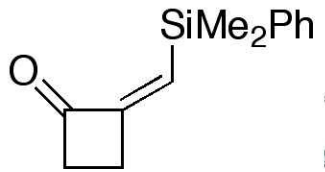

104 MHz  
105 MHz

5.32c

:  
:rec

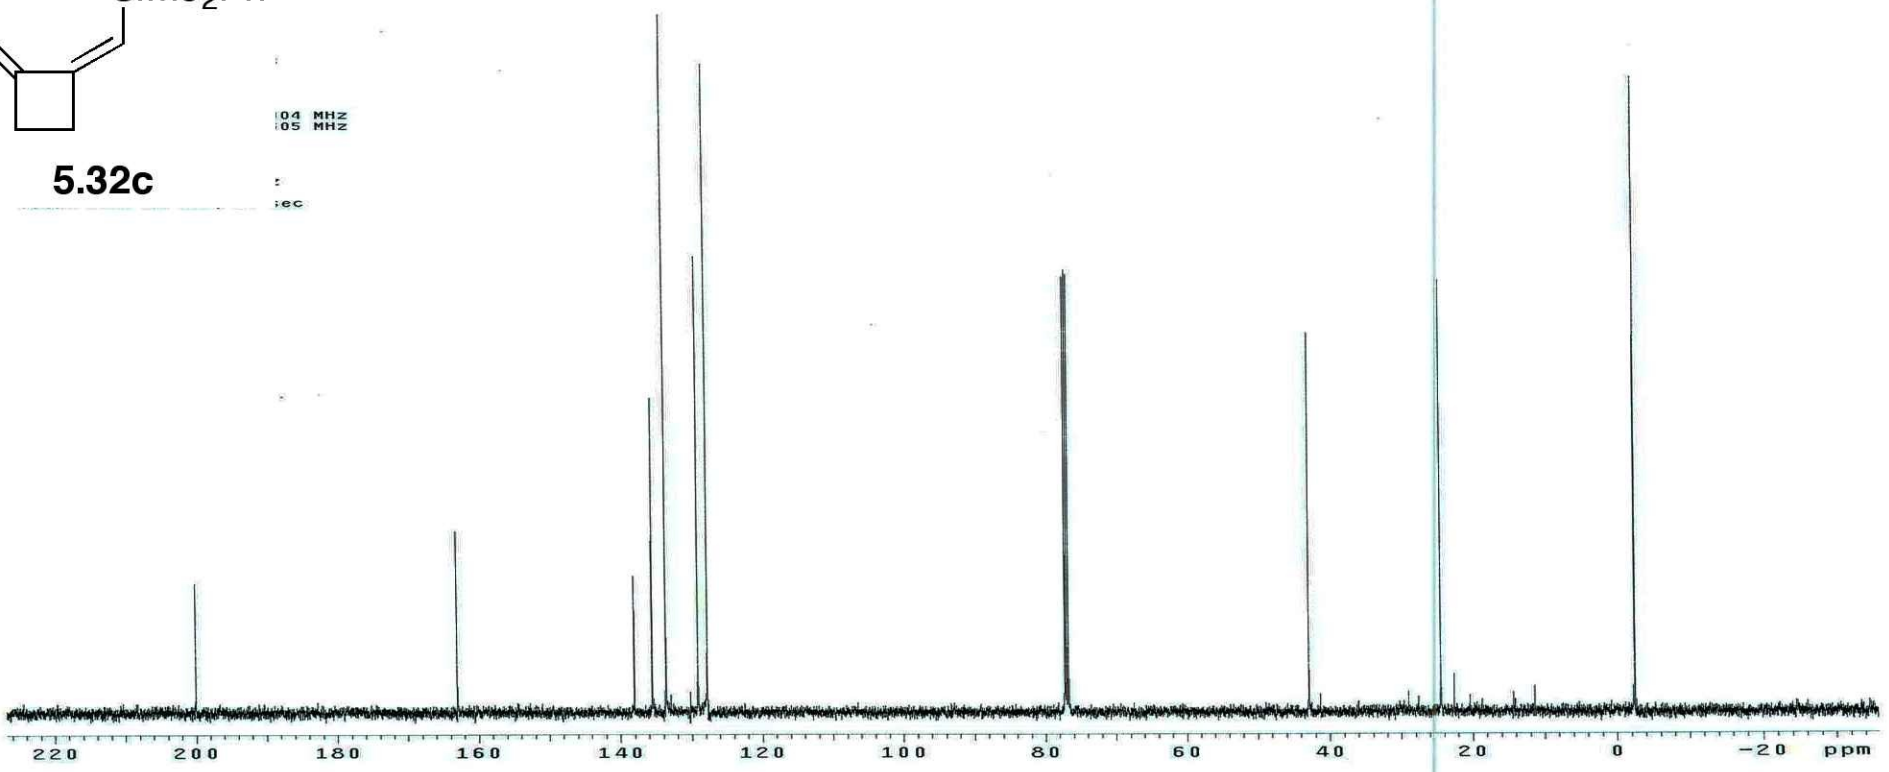

JA-AY-13-1  
Pulse Sequence: s2pu1  
Solvent: CDCl<sub>3</sub>  
Ambient temperature  
INOVA-500 "u1500"  
Pulse 60.0 degrees  
Acq. time 4.000 sec  
Width 8000.0 Hz  
8 repetitions  
OBSERVE H1, 499.7485734 MHz  
DATA PROCESSING  
FT size 131072  
Total time 1 min, 4 sec

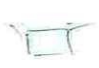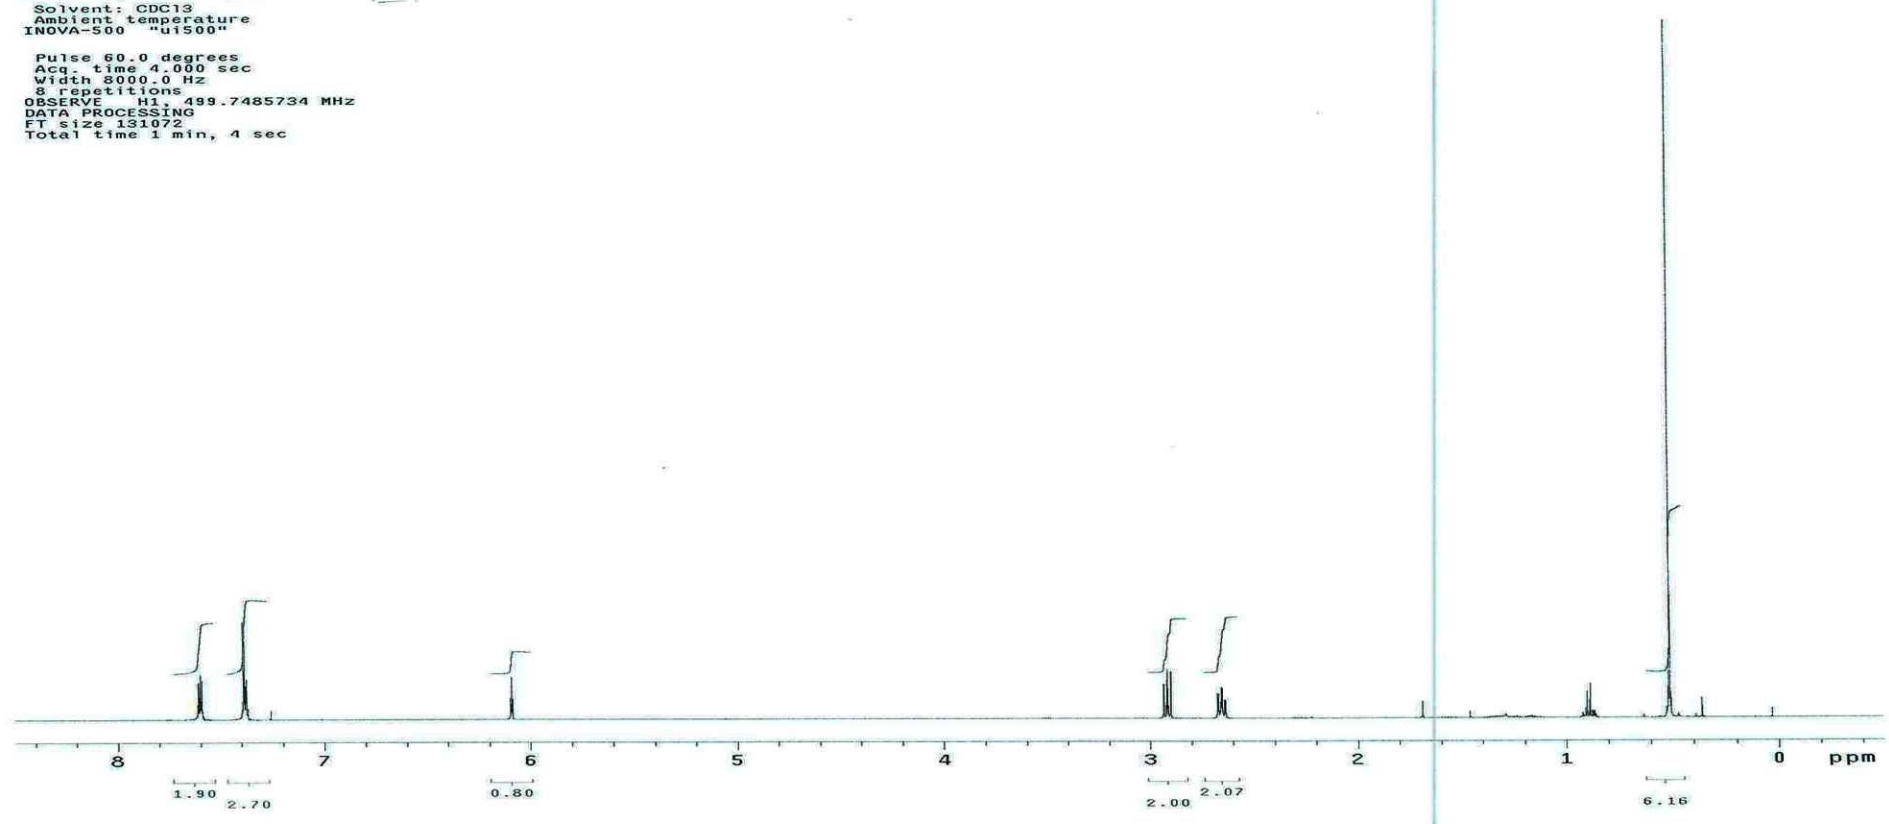

PERKIN ELMER

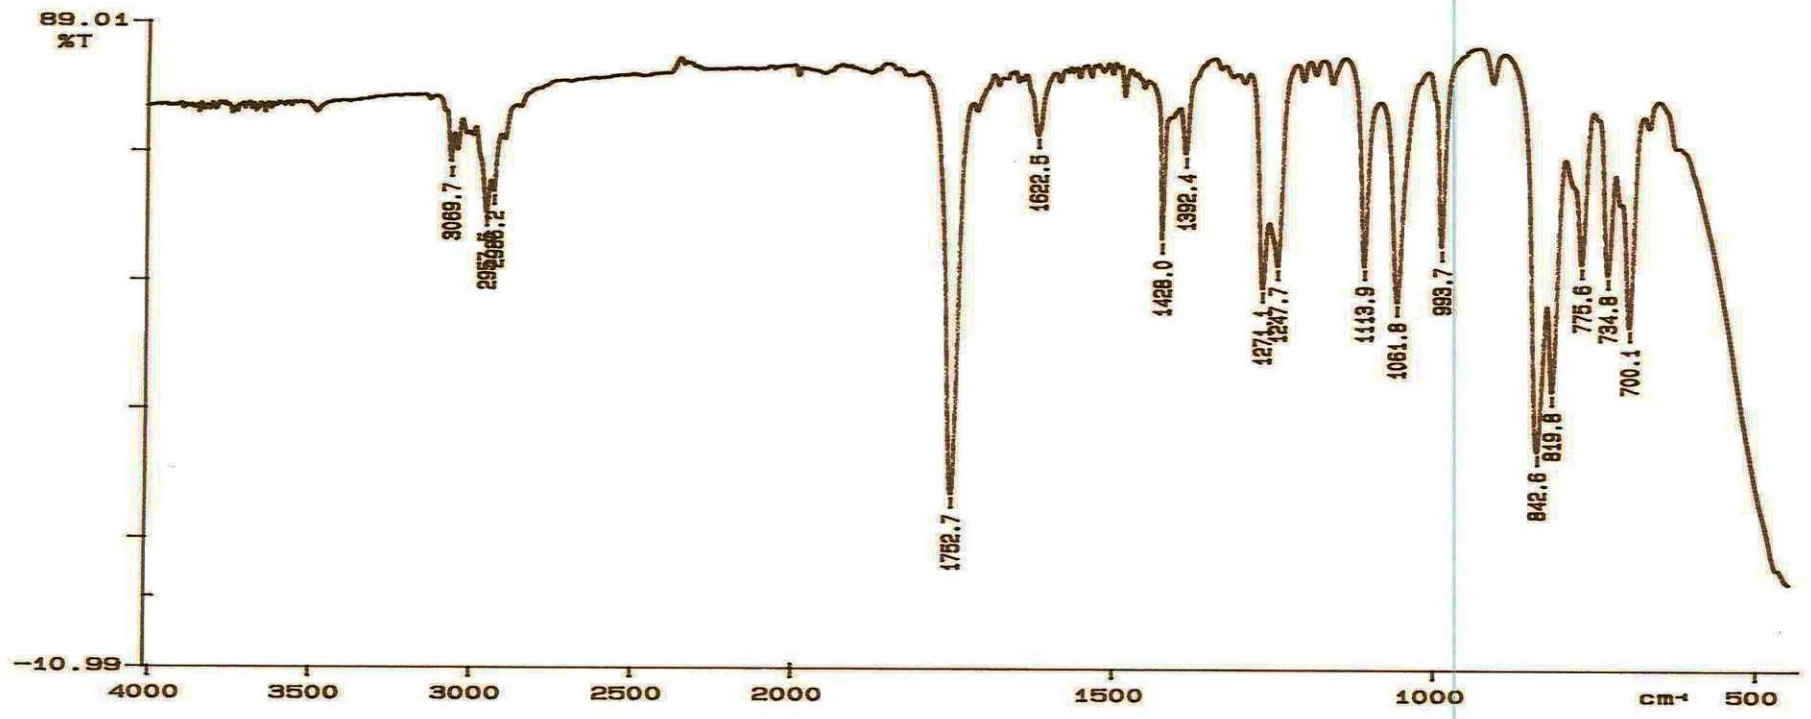

06/08/04 13:39  
X: 4 scans, 4.0cm<sup>-1</sup>

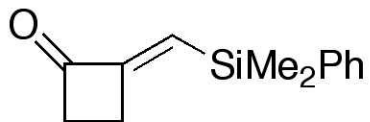

5.32c'

MHZ  
MHZ

DATA PROCESSING  
 Line broadening 2.0 Hz  
 FT size 131072  
 Total time 34 min, 17 sec

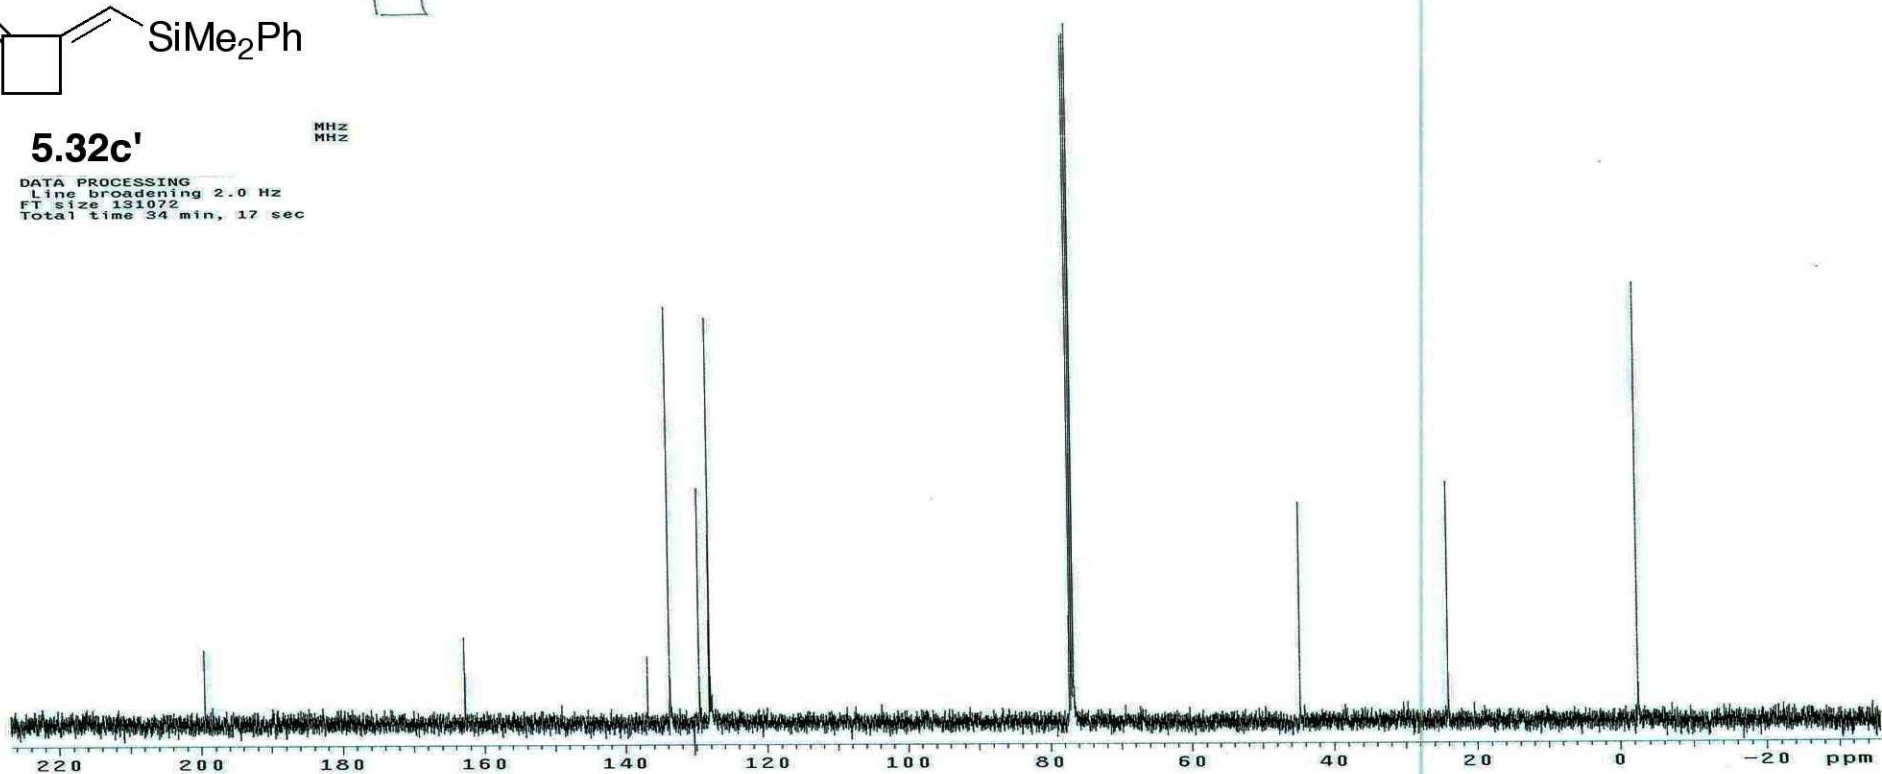

JX-XV-13-2  
 Pulse Sequence: s2pu1  
 Solvent: CDCl3  
 Ambient temperature  
 INOVA-500 "u1500"

Pulse 60.0 degrees  
 Acq. time 4.000 sec  
 Width 8000.0 Hz  
 4 repetitions  
 OBSERVE H1, 499.7485735 MHz  
 DATA PROCESSING  
 FT size 131072  
 Total time 1 min, 4 sec

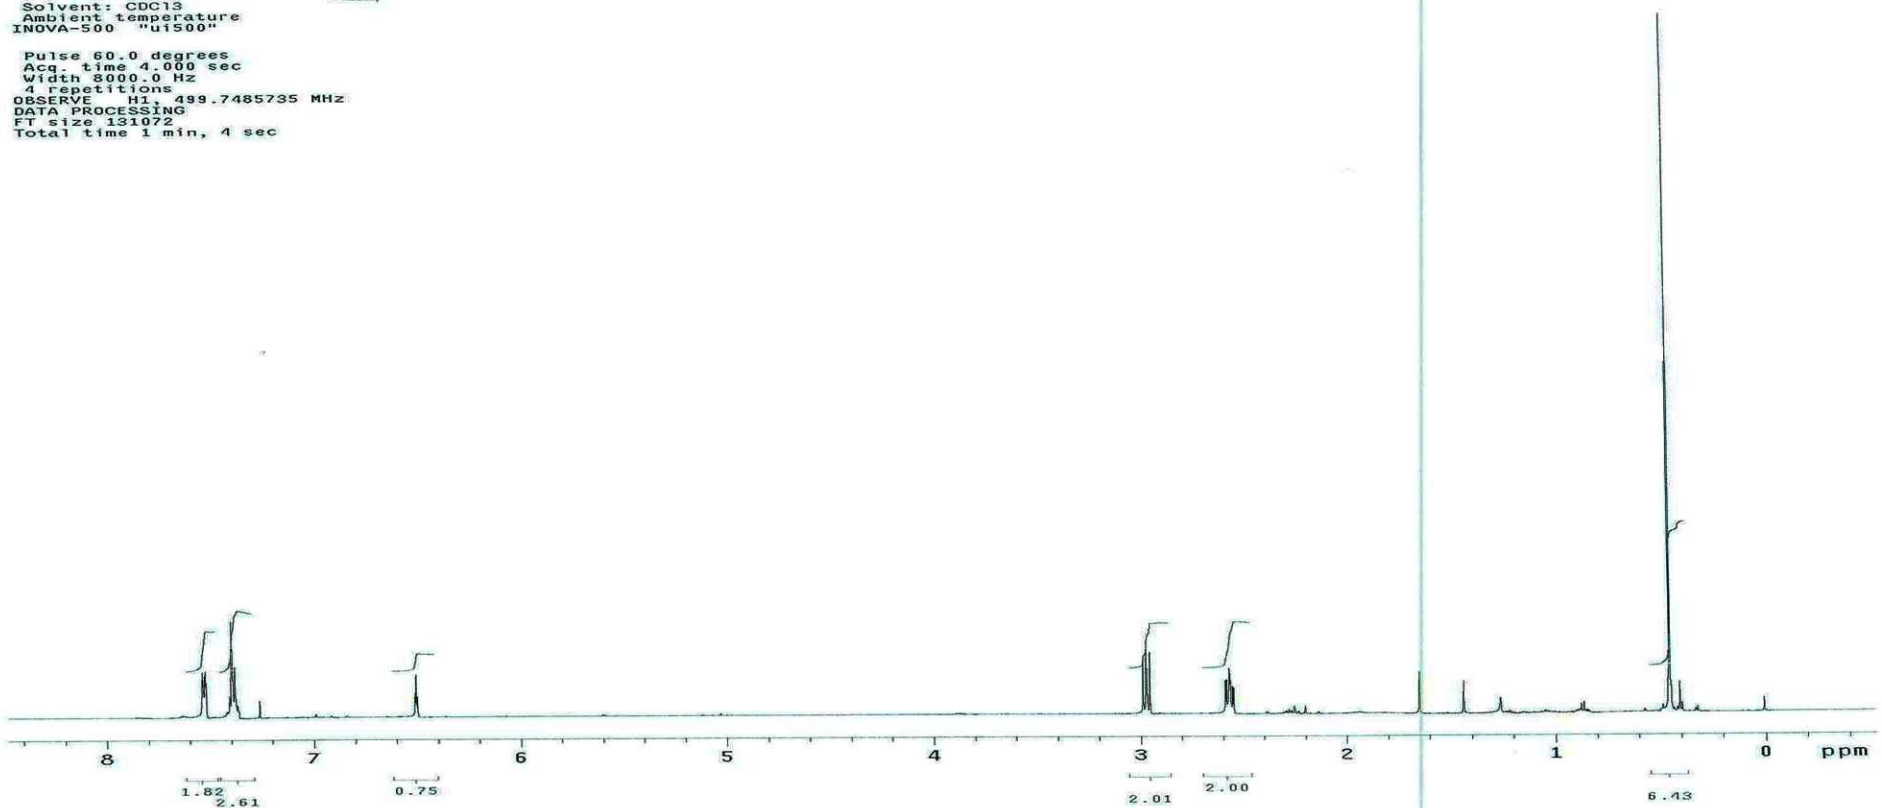

PERKIN ELMER

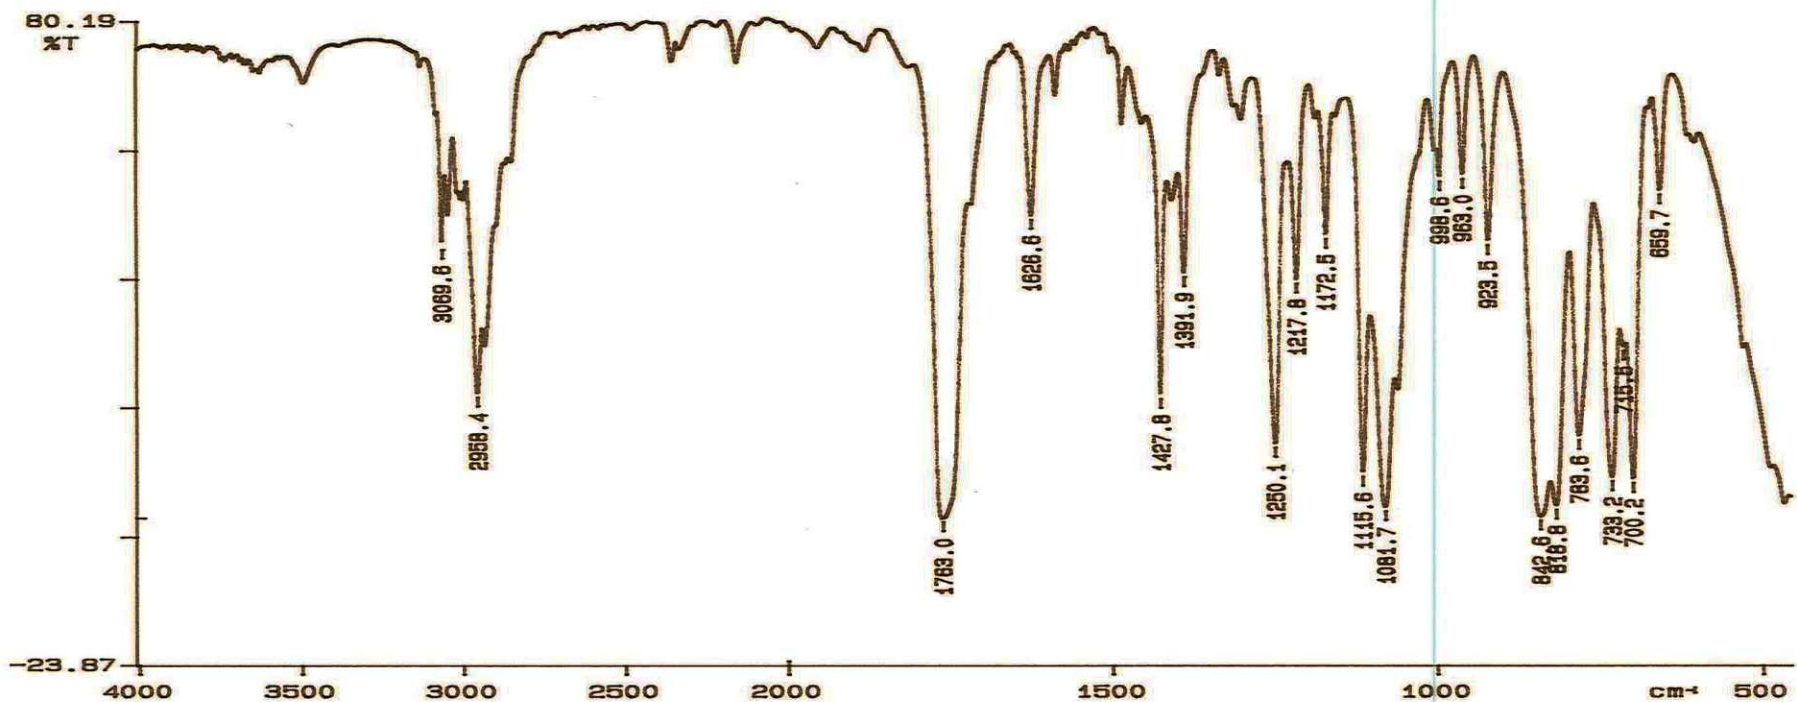



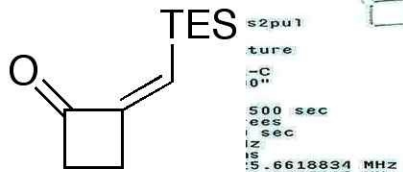

s2pu1  
 ture  
 -C  
 0"  
 500 sec  
 ees  
 sec  
 IZ  
 IS  
 5.6618834 MHz  
 19.7505605 MHz

5.32d  
 Total time 34 min, 17 sec

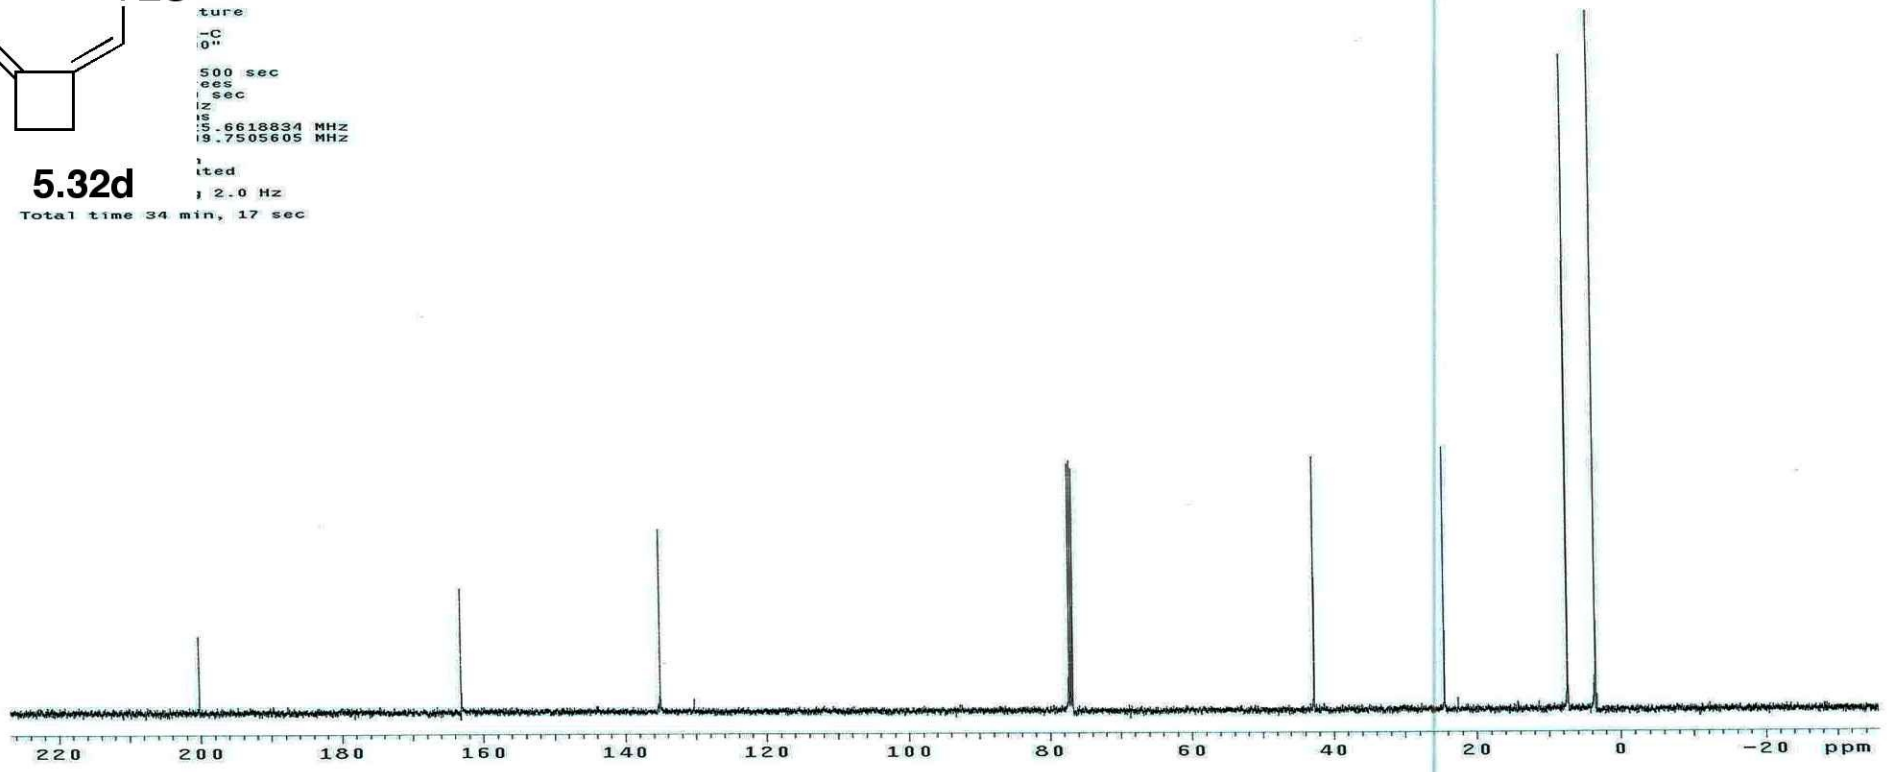

Pulse Sequence: s2pu1  
 Solvent: CDCl3  
 Ambient temperature  
 INOVA-500 "u1500"  
 Pulse 60.0 degrees  
 Acq. time 4.000 sec  
 Width 8000.0 Hz  
 4 repetitions  
 OBSERVE H1, 499.7485607 MHz  
 DATA PROCESSING  
 FT size 131072  
 Total time 1 min, 4 sec

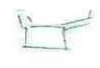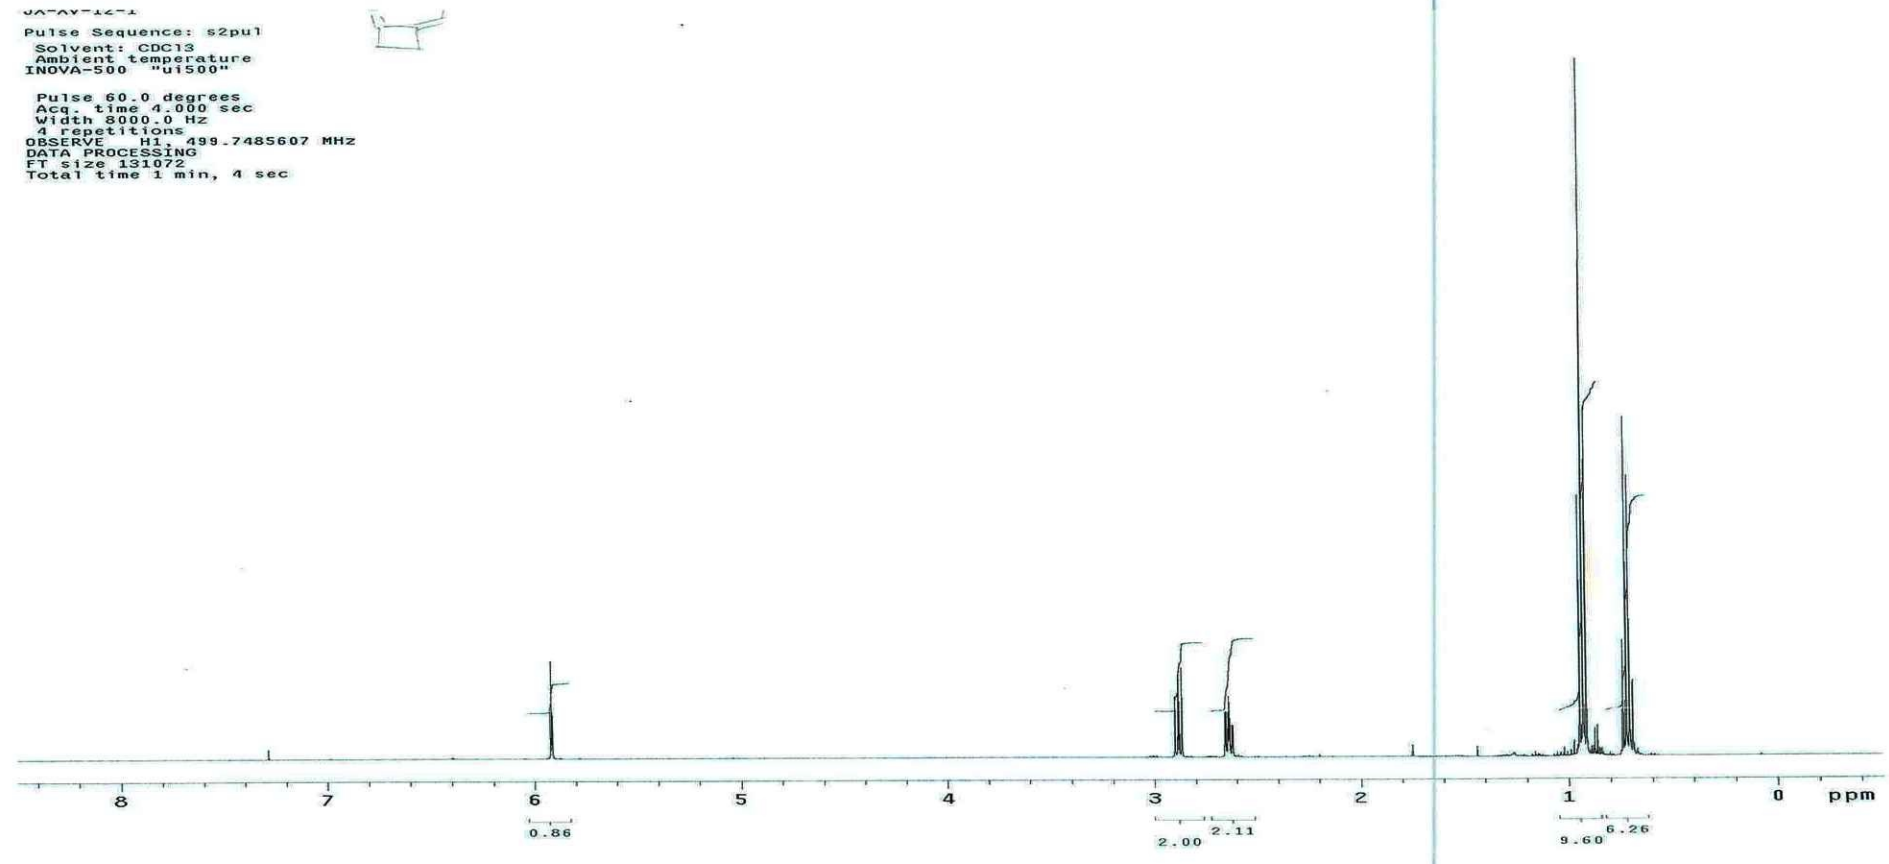

PERKIN ELMER

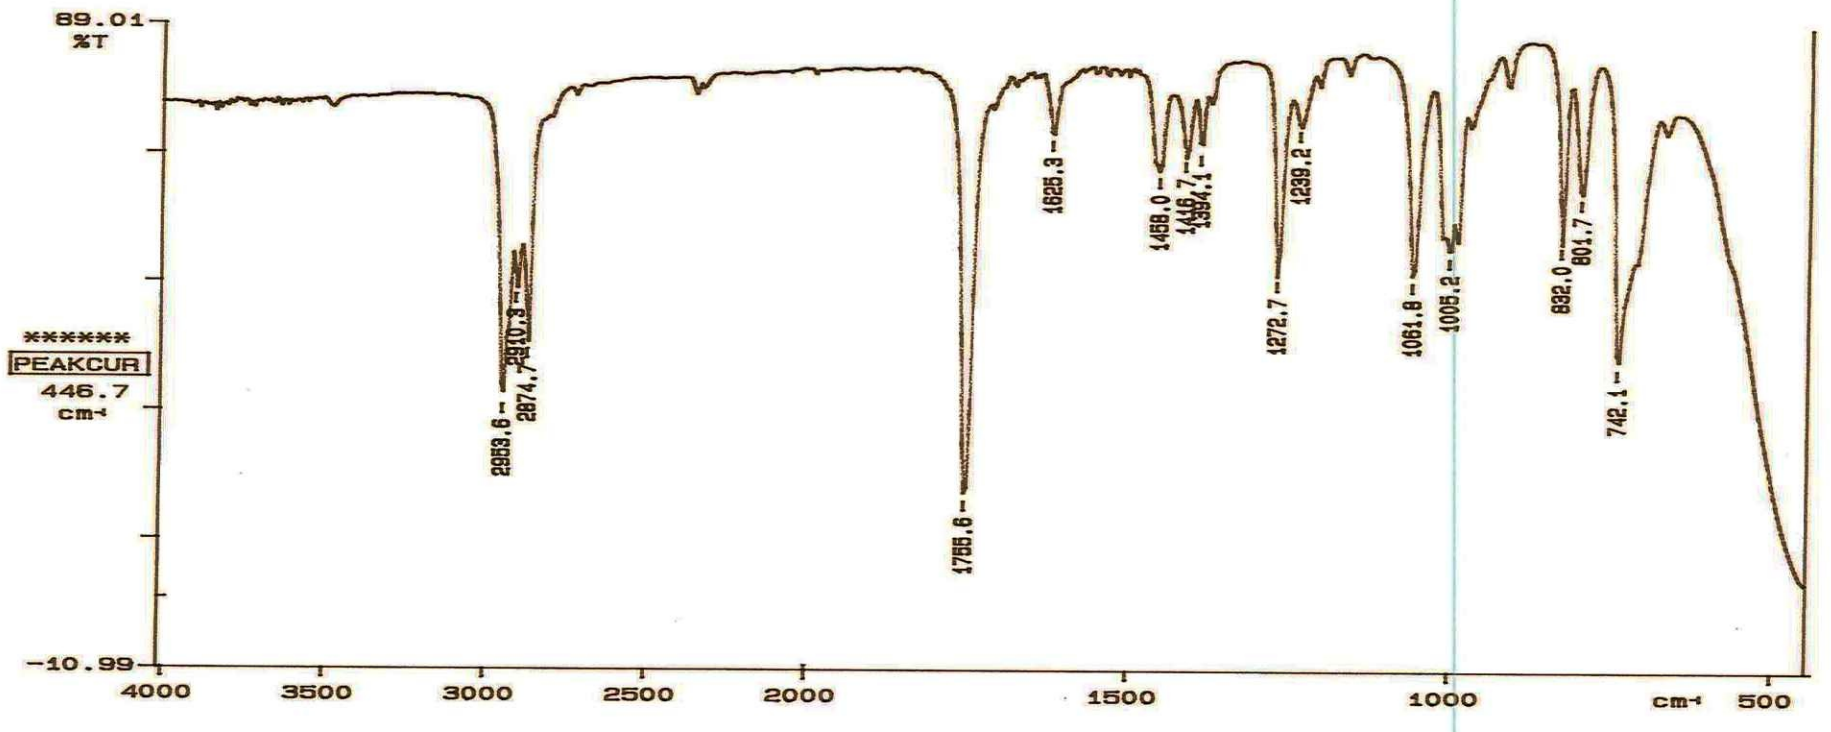

06/08/04 13:11  
 X: 4 scans, 4.0cm-1

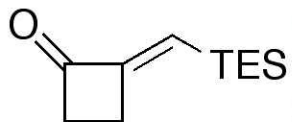

5.32d'

18808 MHz  
105605 MHz

WALTZ-16 modulated  
DATA PROCESSING  
Line broadening 2.0 Hz  
FT size 131072  
Total time 34 min, 17 sec

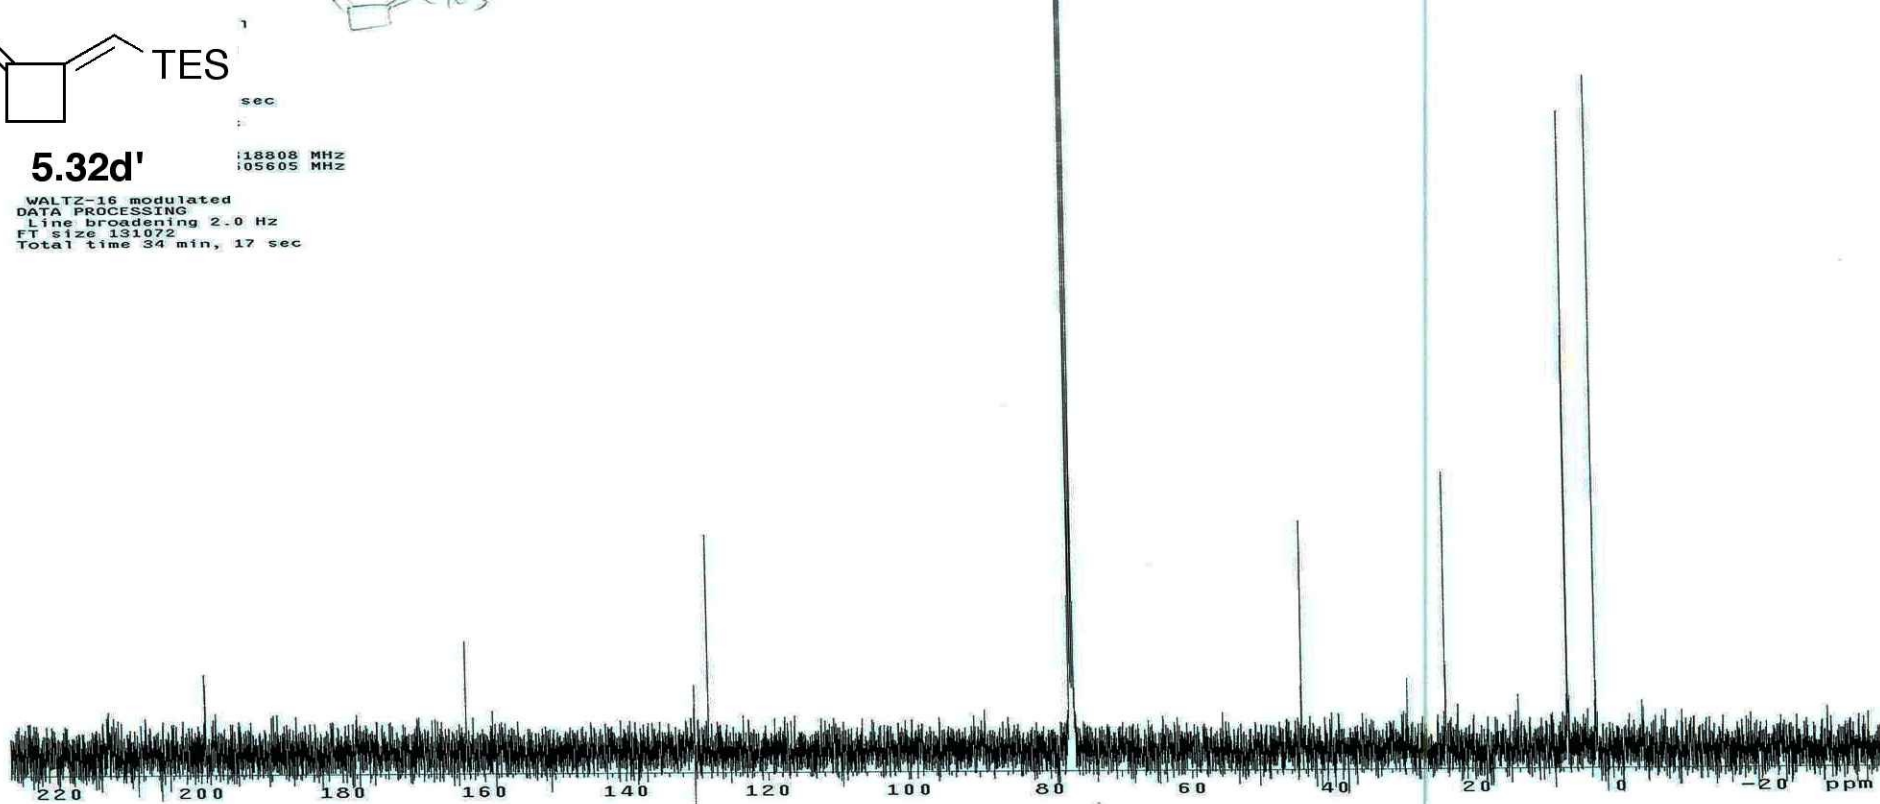

JX-XV-12-2

Pulse Sequence: s2pu1  
Solvent: CDCl3  
Ambient Temperature:  
INOVA-500 "u1500"

Pulse 60.0 degrees  
Acq. time 4.000 sec  
Width 8000.0 Hz  
4 repetitions  
OBSERVE N1 499.7485738 MHz  
DATA PROCESSING  
FT size 131022  
Total time 1 min, 4 sec

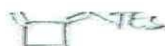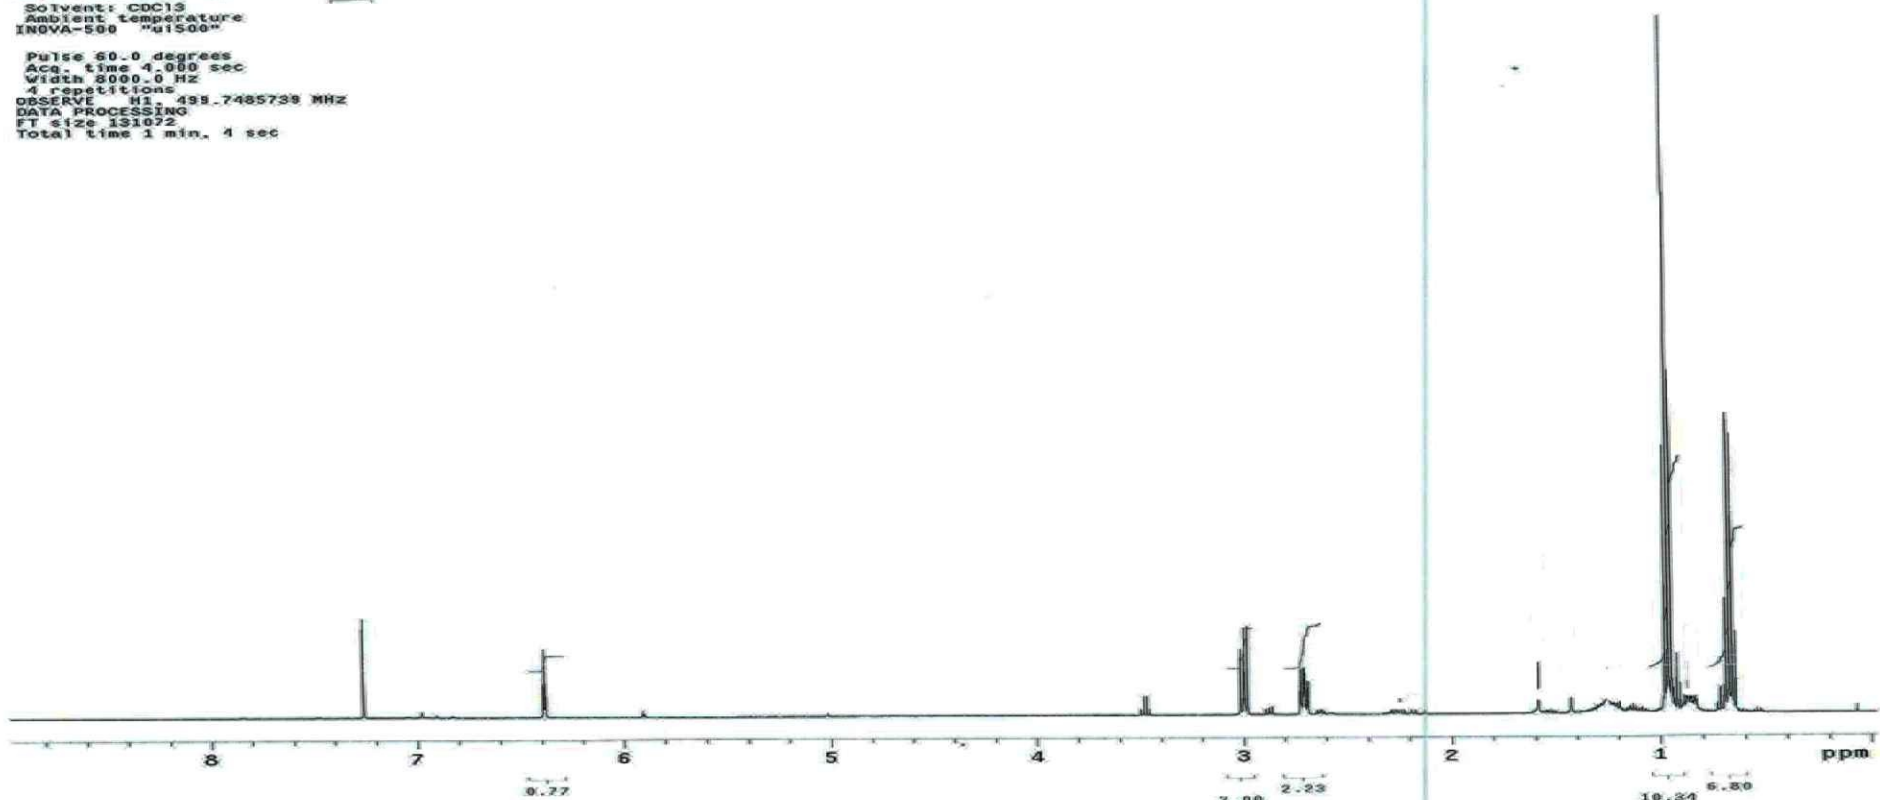

PERKIN ELMER

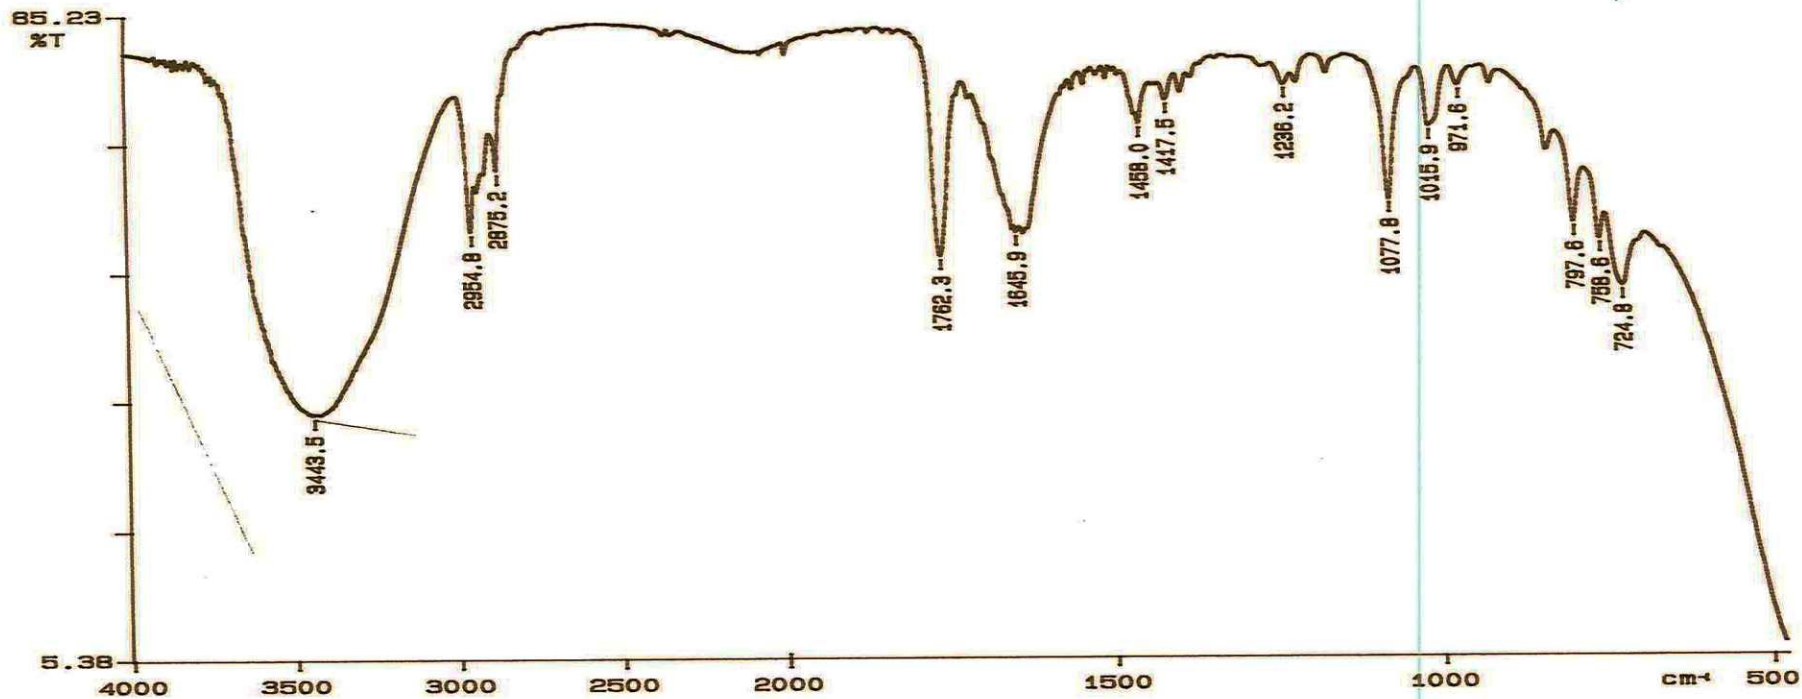

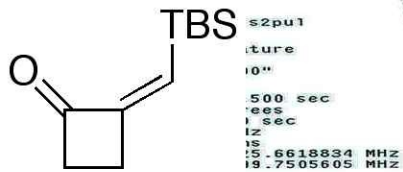

5.32e

ited  
 j 2.0 Hz  
 in, 17 sec

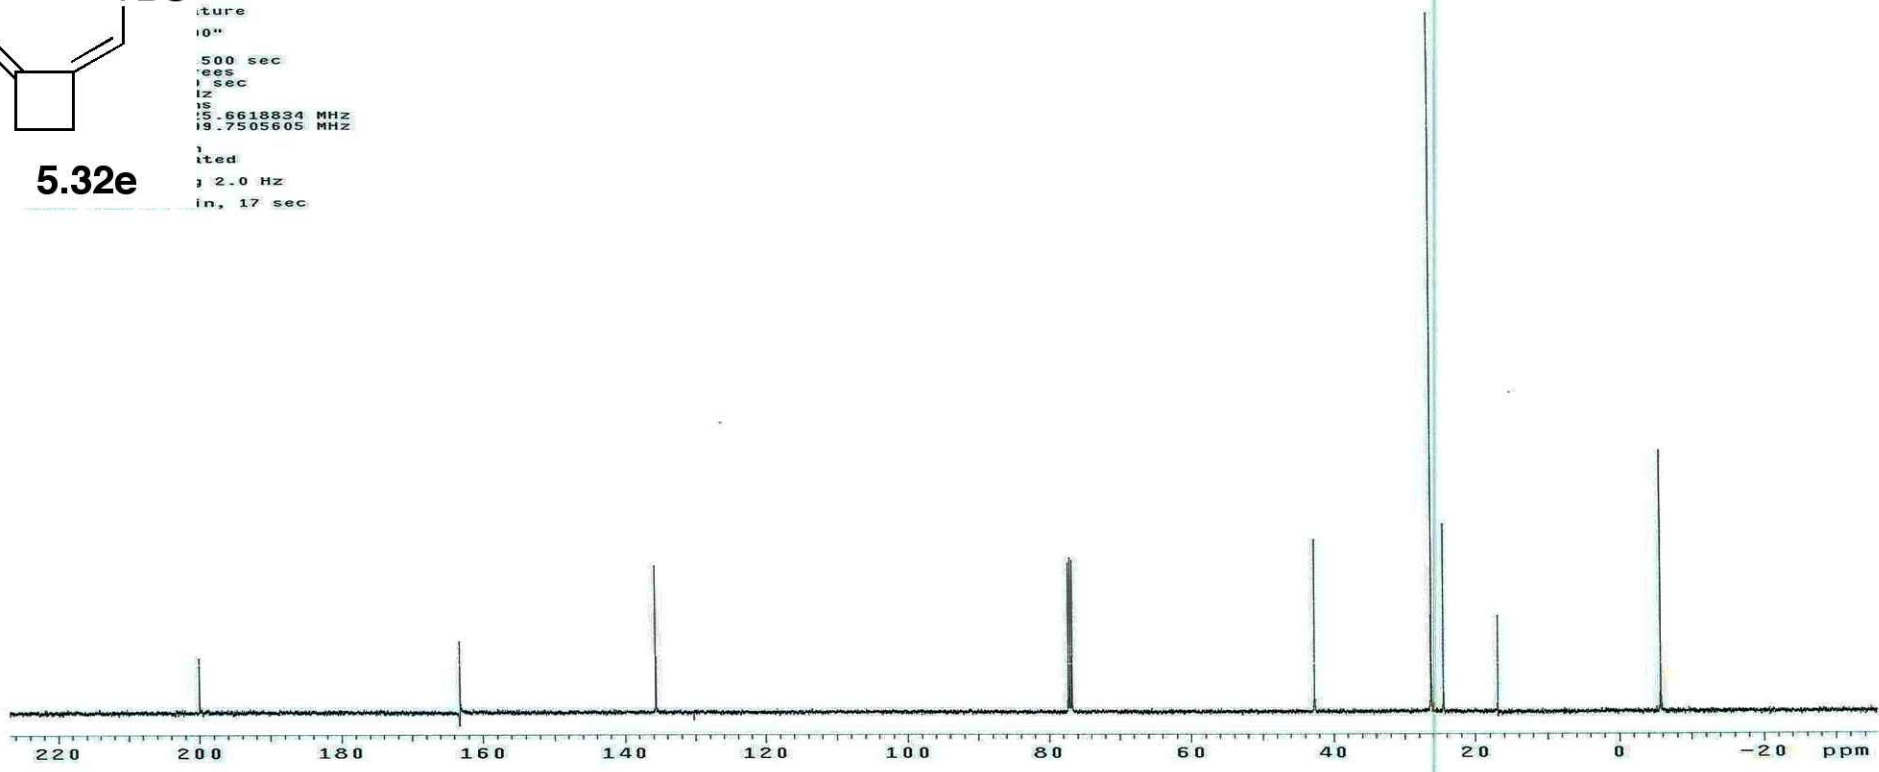

JX-XV-ZD-1  
 Pulse Sequence: s2pu1  
 Solvent: CDCl3  
 Ambient temperature  
 INOVA-500 "ui500"  
 Pulse 60.0 degrees  
 Acq. time 4.000 sec  
 Width 8000.0 Hz  
 8 repetitions  
 OBSERVE H1, 499.7485735 MHz  
 DATA PROCESSING  
 FT size 131072  
 Total time 1 min, 4 sec

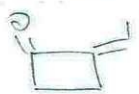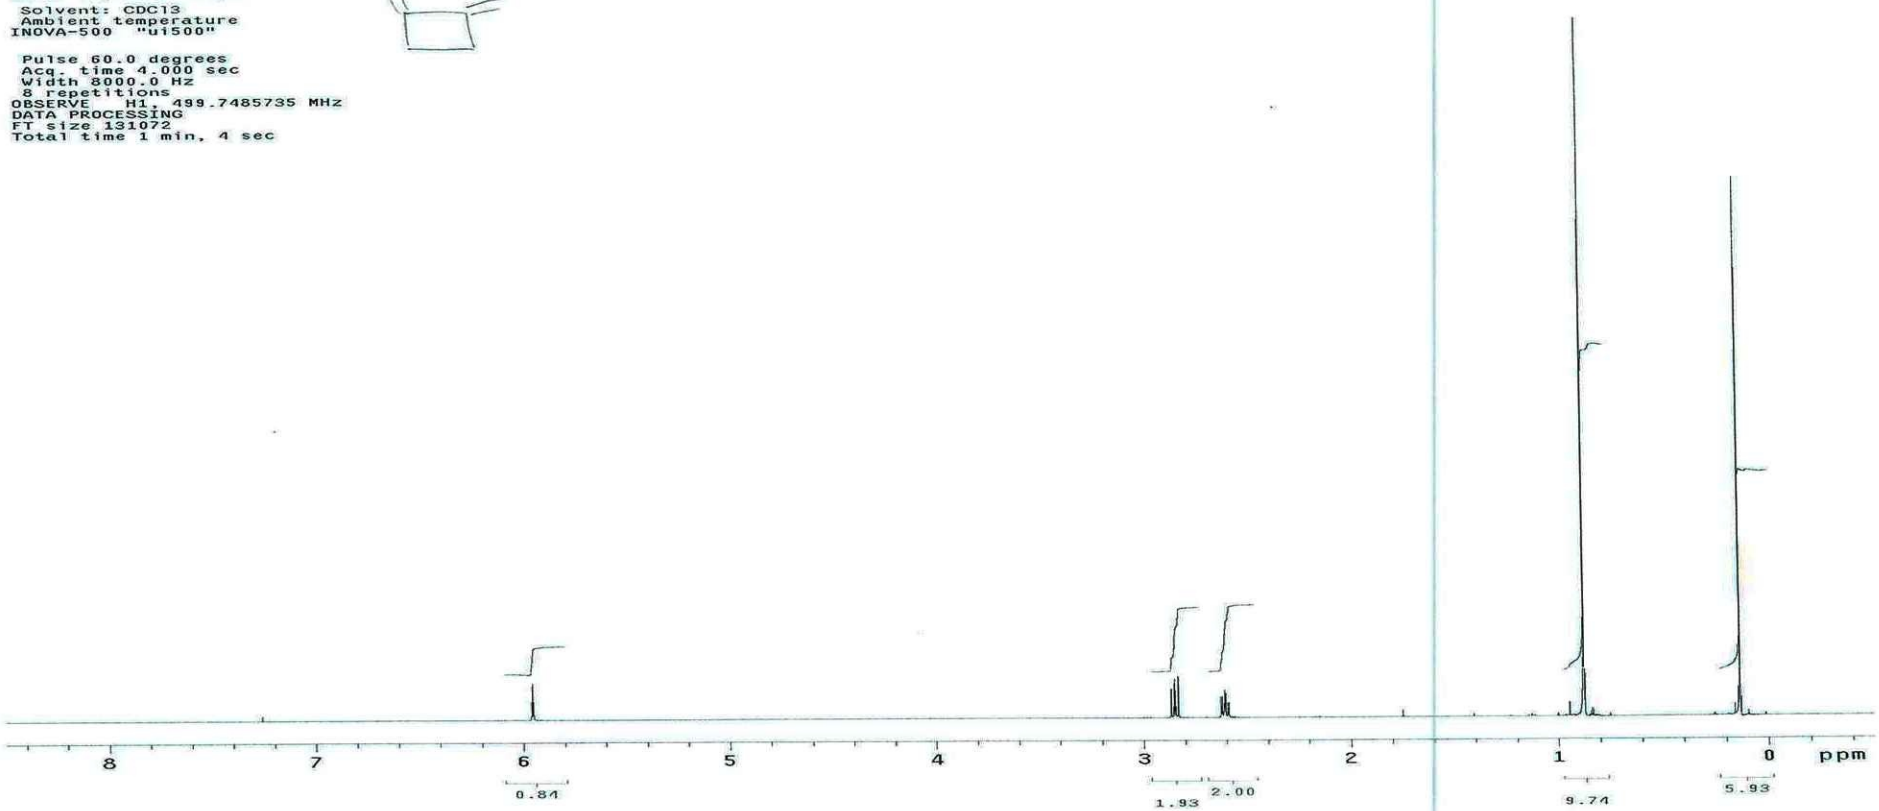

PERKIN ELMER

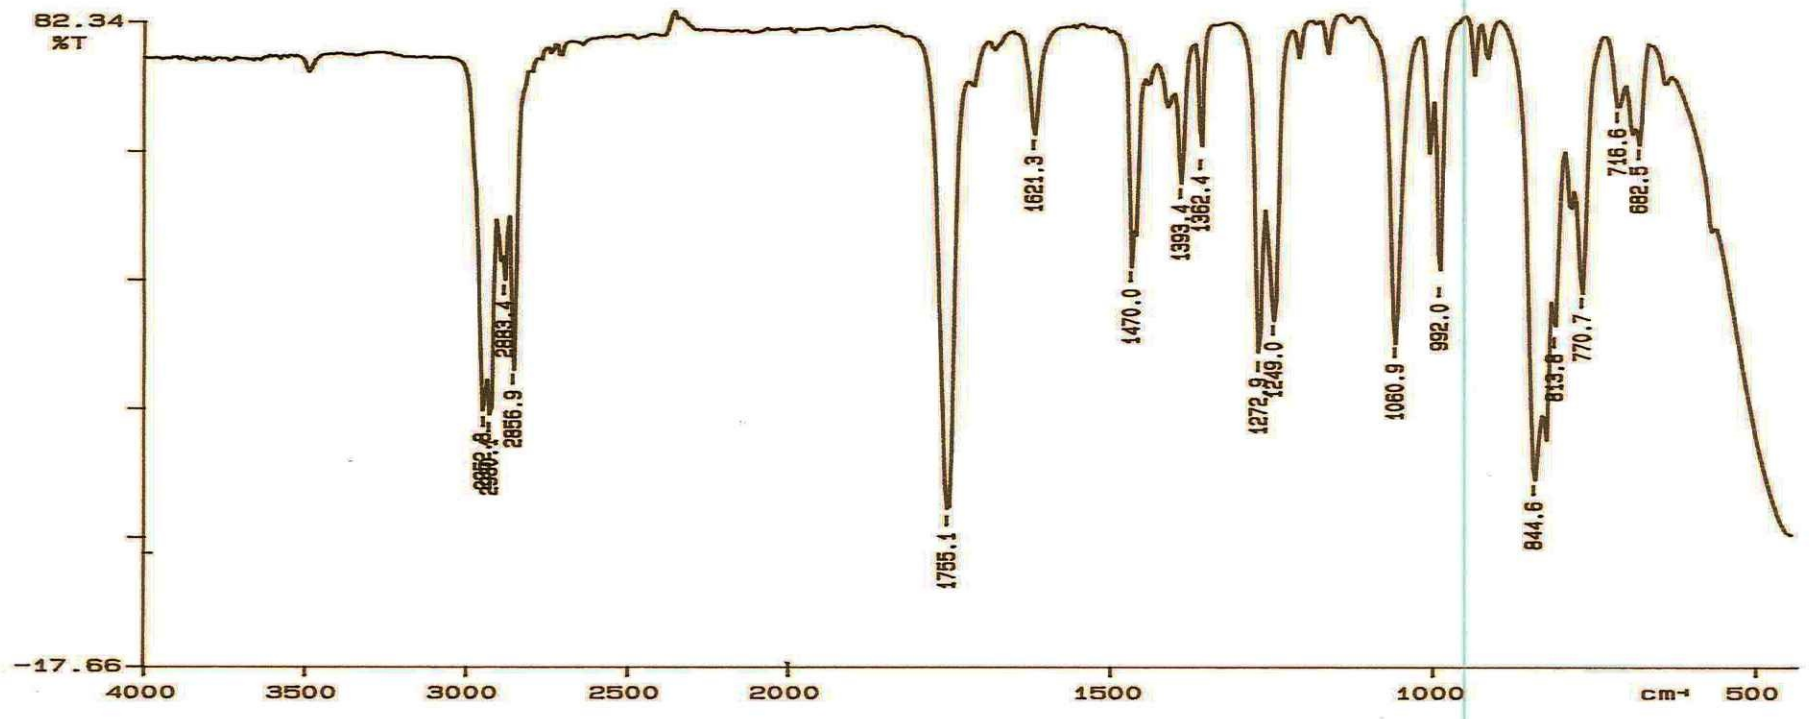



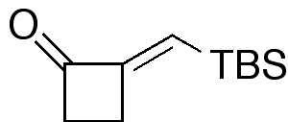

5.32e'

| PPM     | HEIGHT |
|---------|--------|
| 189.361 | 13.3   |
| 162.616 | 15.5   |
| 130.292 | 14.1   |
| 128.577 | 33.4   |
| 77.256  | 320.9  |
| 77.000  | 328.5  |
| 76.748  | 317.5  |
| 44.583  | 39.4   |
| 26.249  | 156.3  |
| 24.357  | 41.4   |
| 17.172  | 22.6   |
| -5.671  | 57.3   |

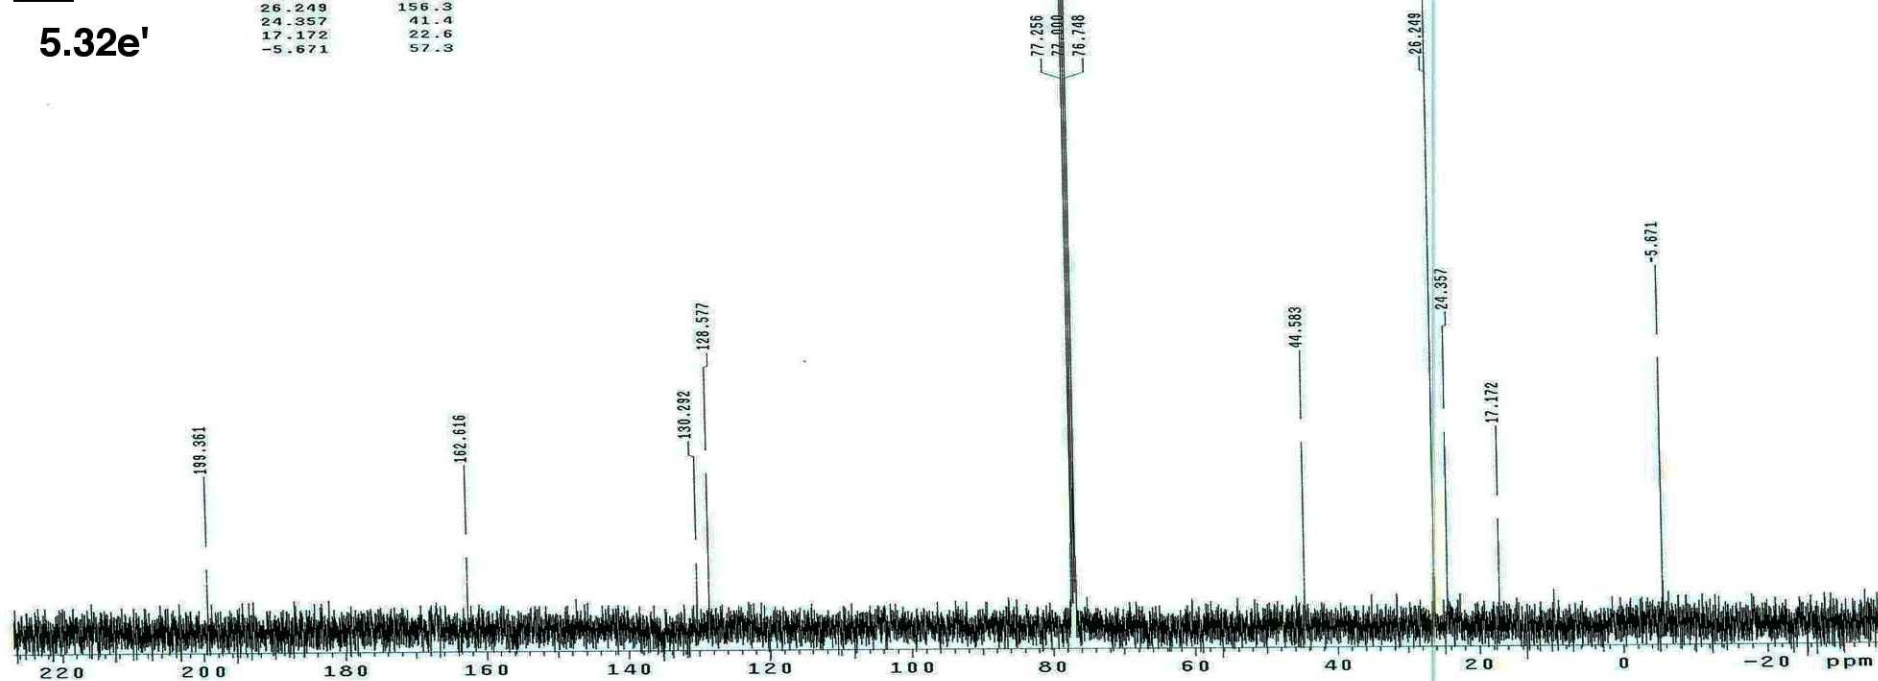

JX-XV-25-2  
Pulse Sequence: s2pu1  
Solvent: CDCl3  
Ambient temperature  
INOVA-500 "ui500"  
Pulse 60.0 degrees  
Acq. time 4.000 sec  
Width 8000.0 Hz  
8 repetitions  
OBSERVE H1, 499.7485738 MHz  
DATA PROCESSING  
FT size 131072  
Total time 1 min, 4 sec

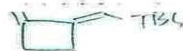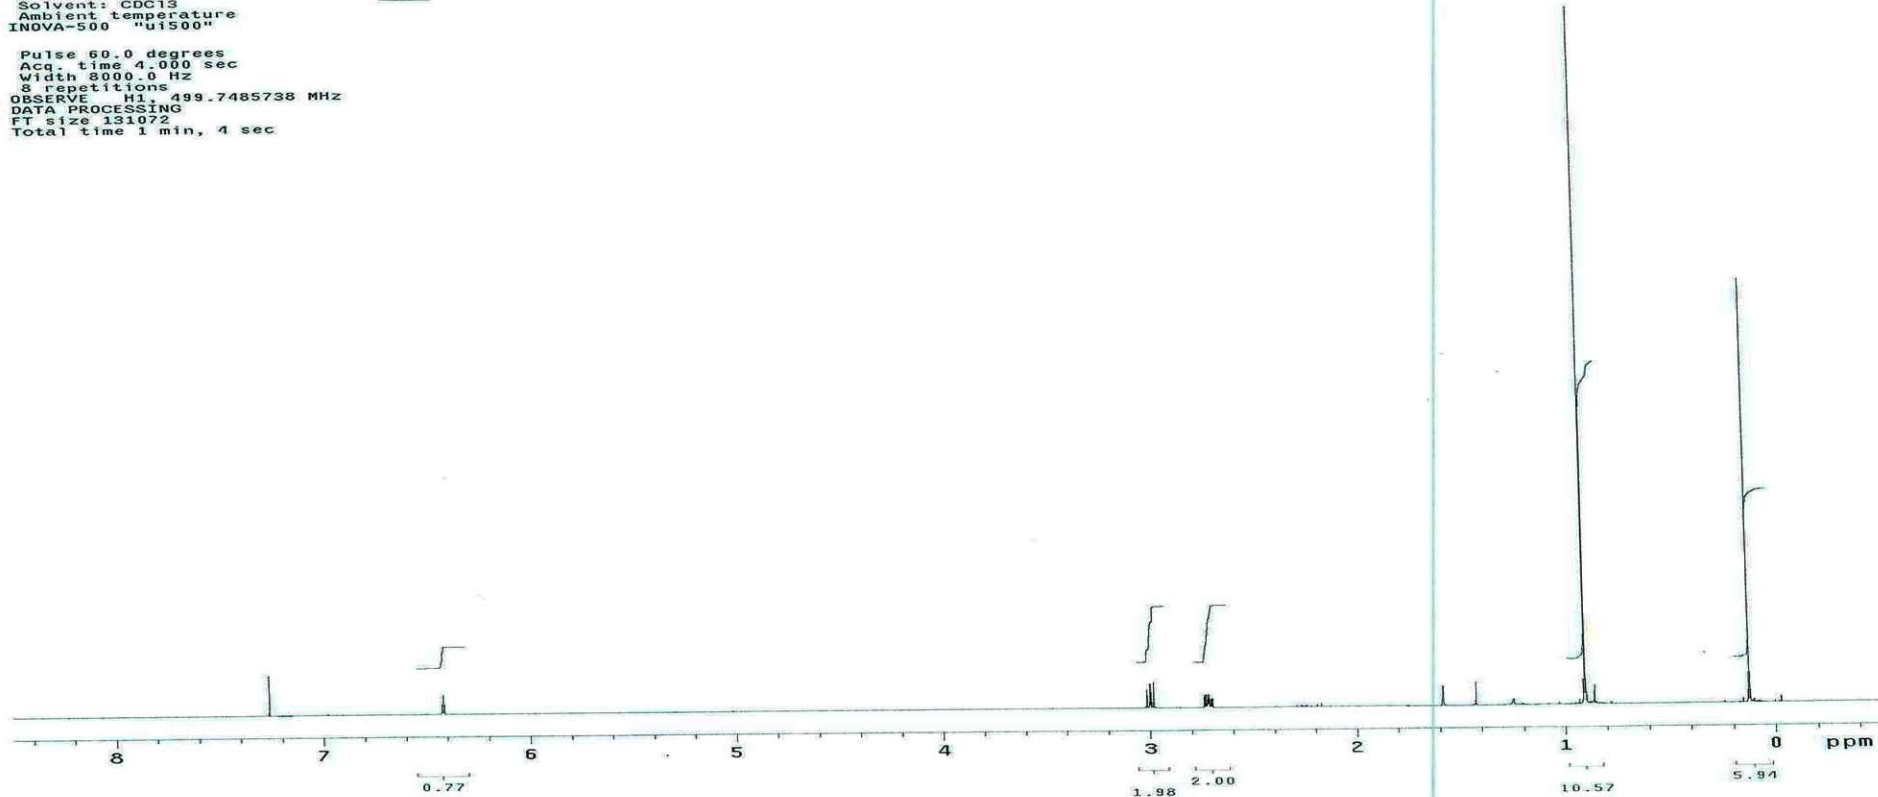

PERKIN ELMER

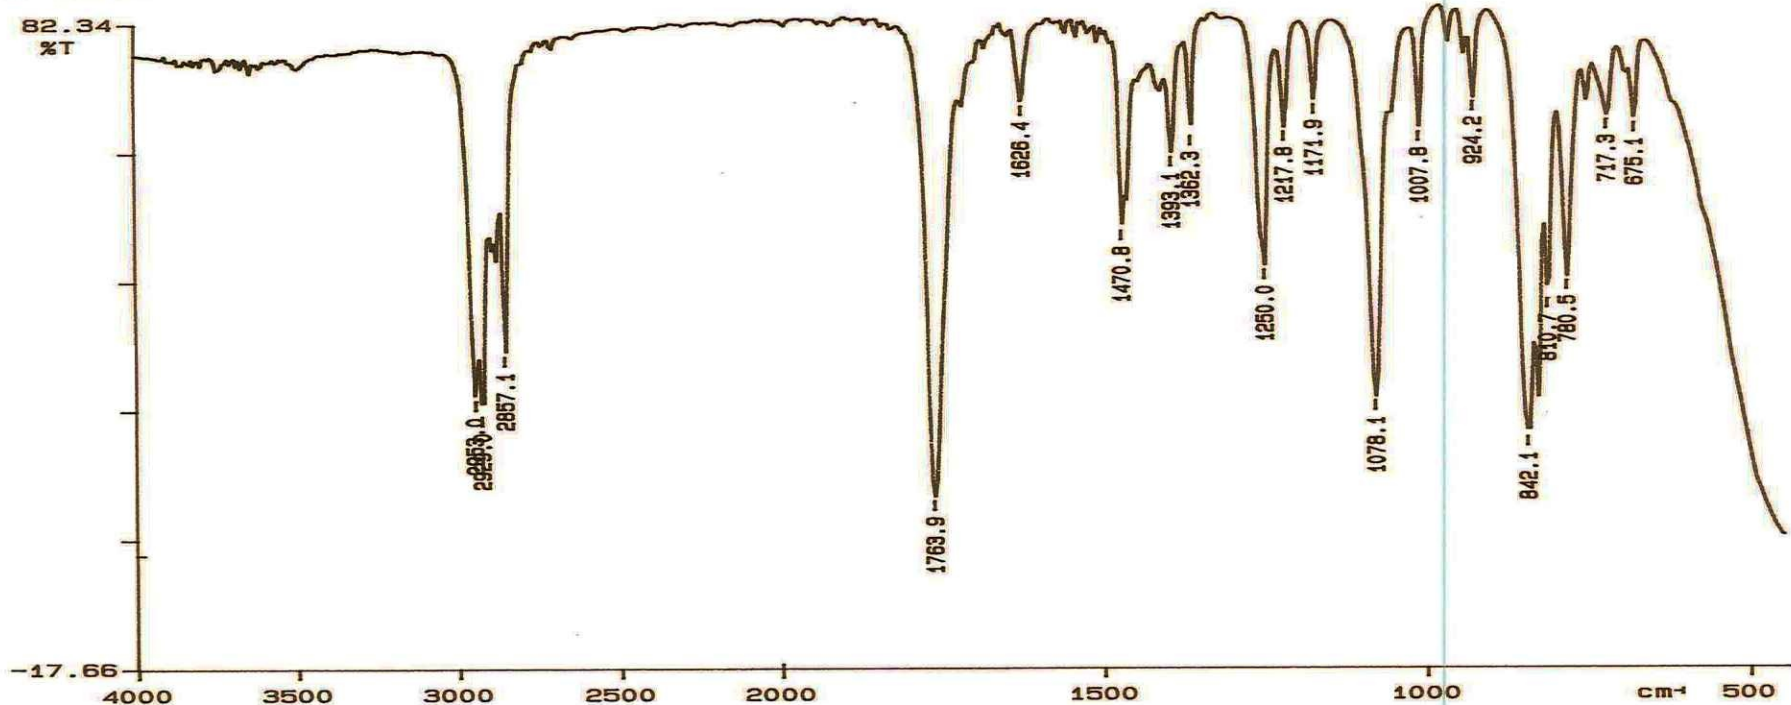

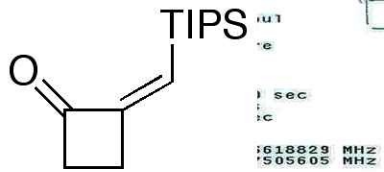

5.32g

1.0 Hz  
17 sec

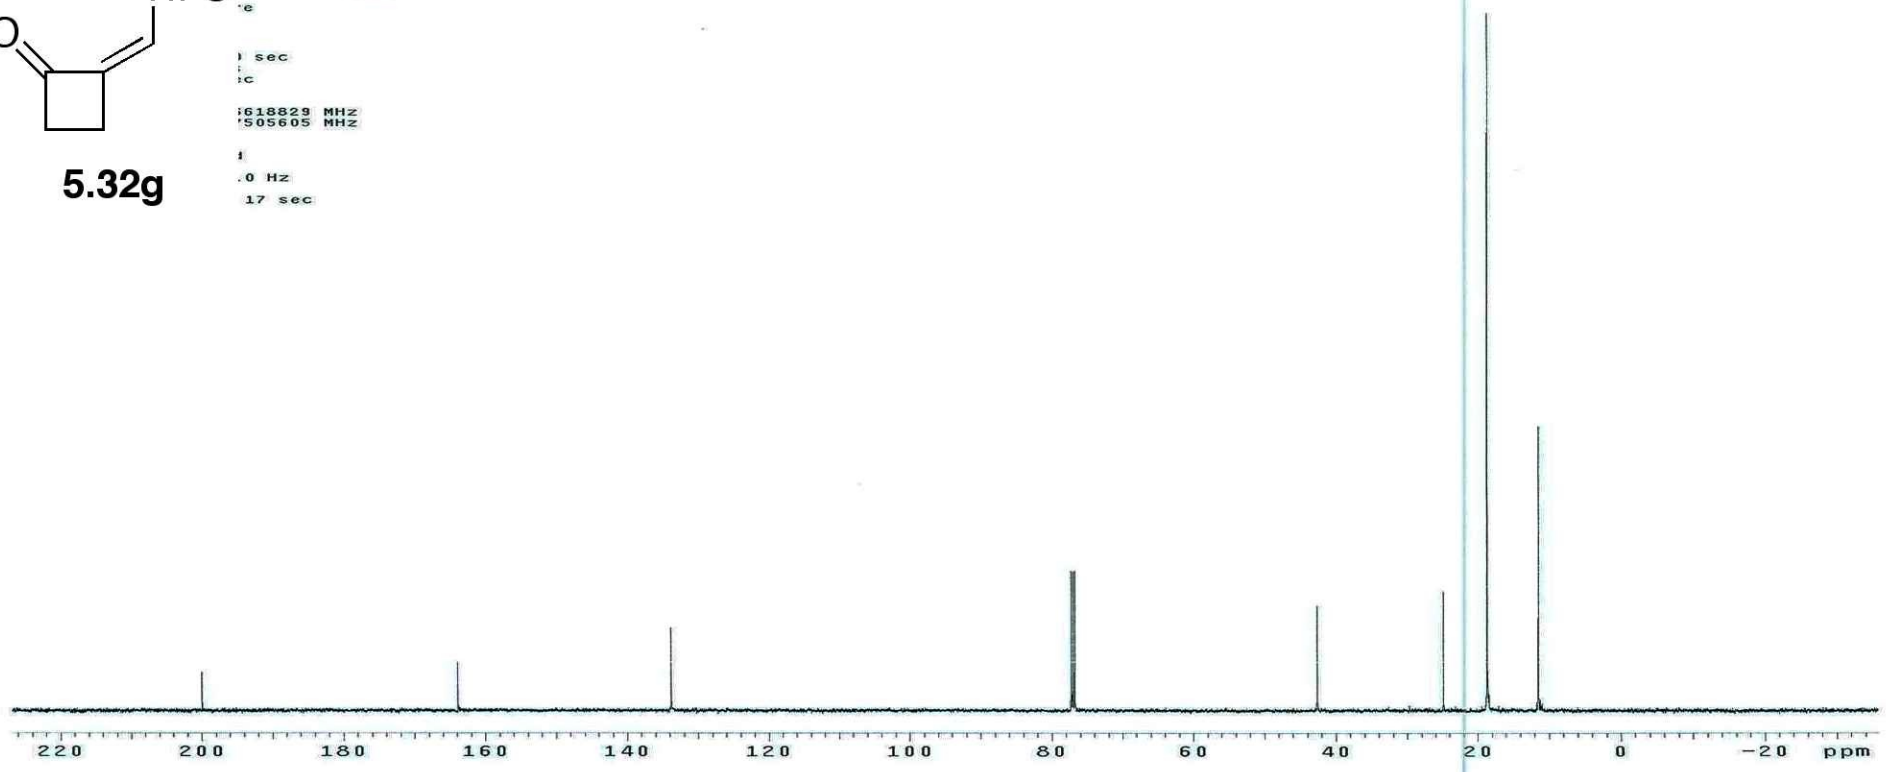

Pulse Sequence: s2pu1  
Solvent: CDCl3  
Ambient temperature  
INOVA-500 "ui500"

Pulse 60.0 degrees  
Acq. time 4.000 sec  
Width 8000.0 Hz  
4 repetitions  
OBSERVE H1, 499.7485737 MHz  
DATA PROCESSING  
FT size 131072  
Total time 1 min, 4 sec

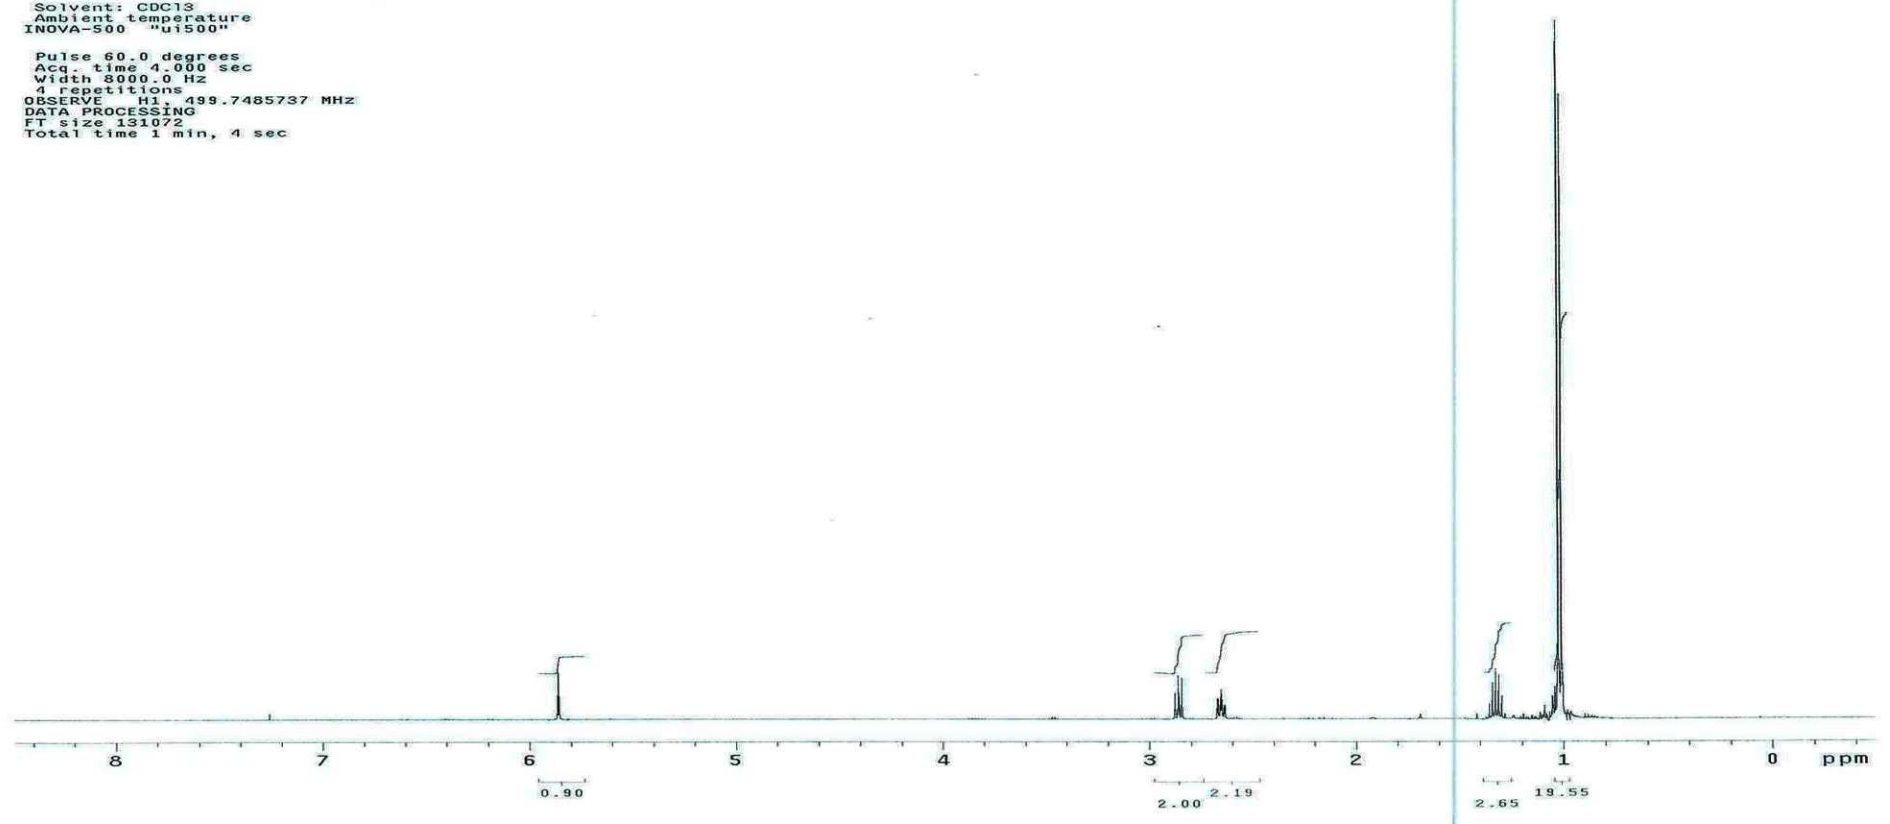

PERKIN ELMER

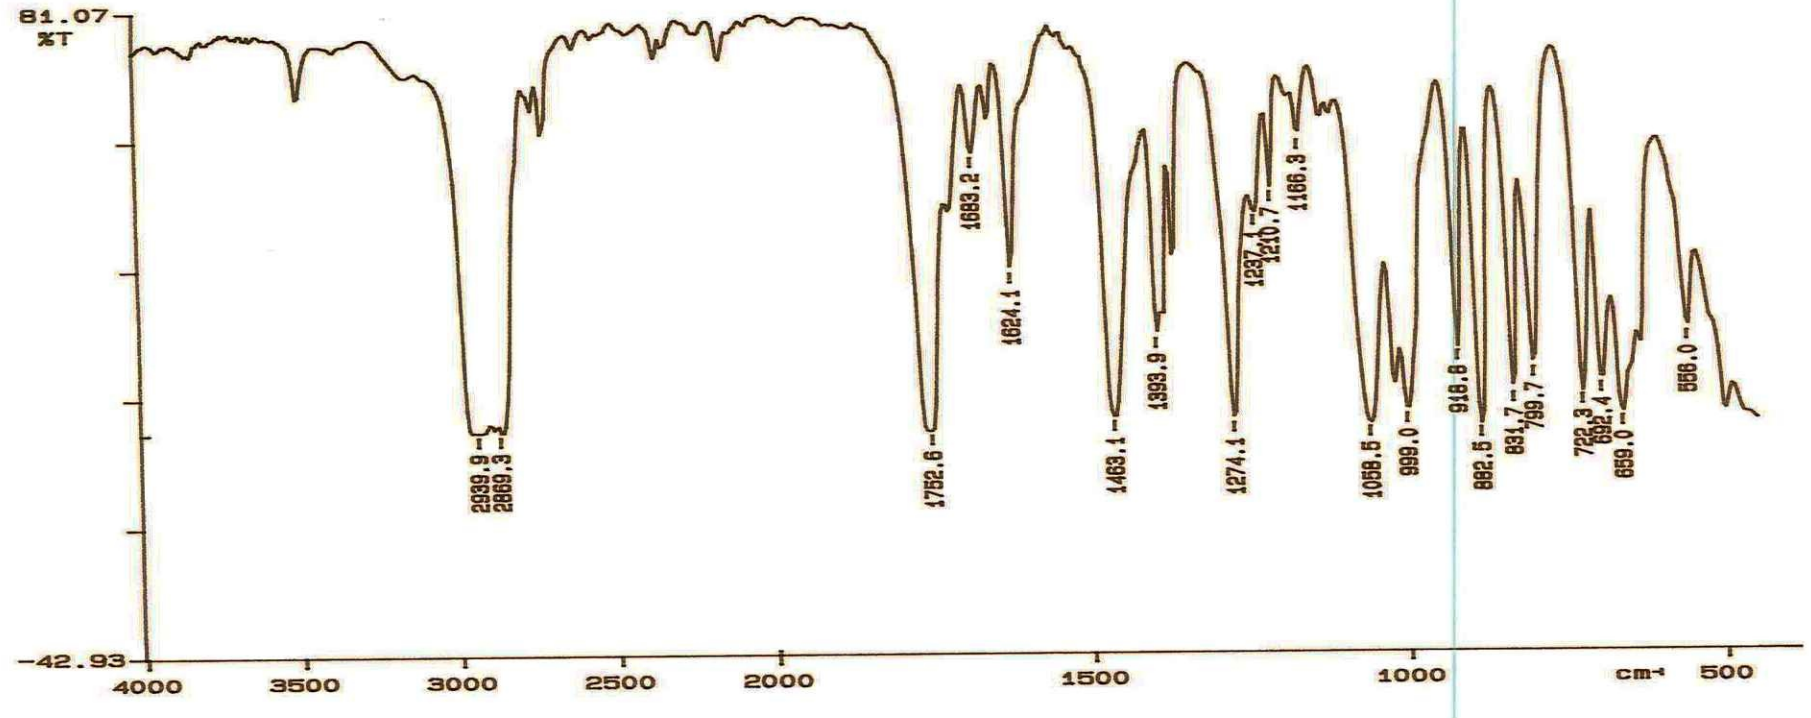

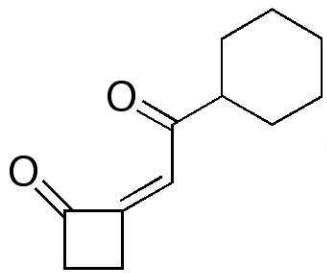

5.33a

8 MHz

2 MHz

c

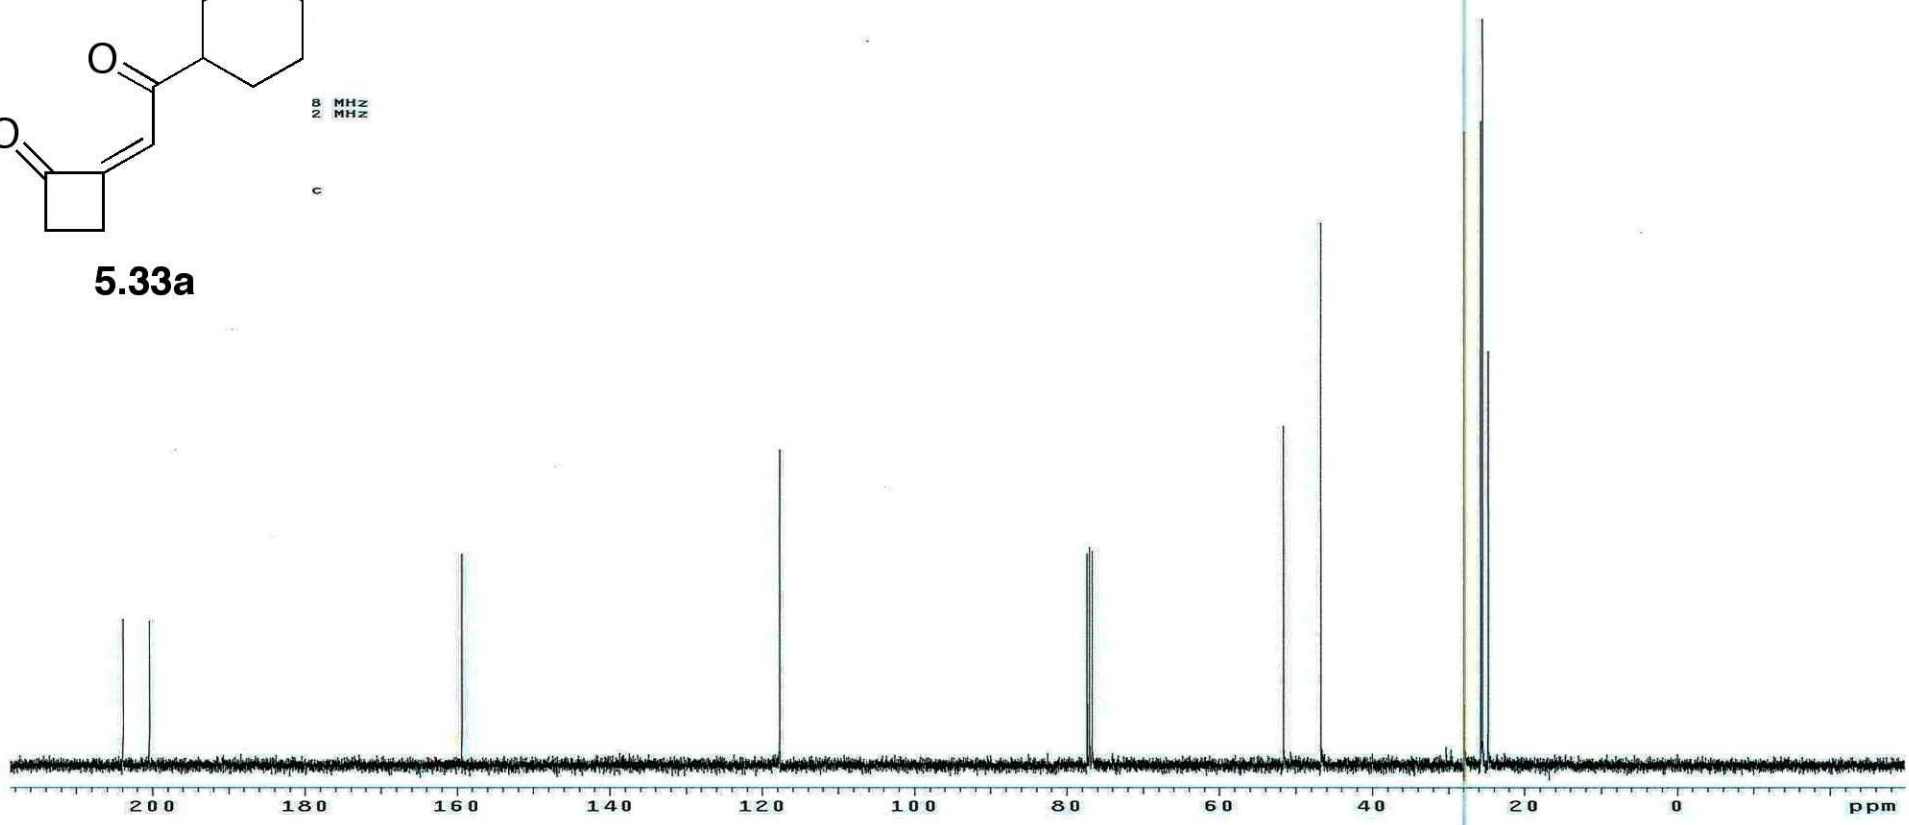

JX-XVI-77

Pulse Sequence: s2pu1

Solvent: CDCl3  
Ambient temperature  
Mercury-400BB "merc400"

Relax. delay 0.500 sec  
Pulse 57.1 degrees  
Acq. time 4.002 sec  
Width 4997.5 Hz  
16 repetitions  
OBSERVE H1, 400.1115369 MHz  
DATA PROCESSING  
F1 size 65536  
Total time 1 min, 22 sec

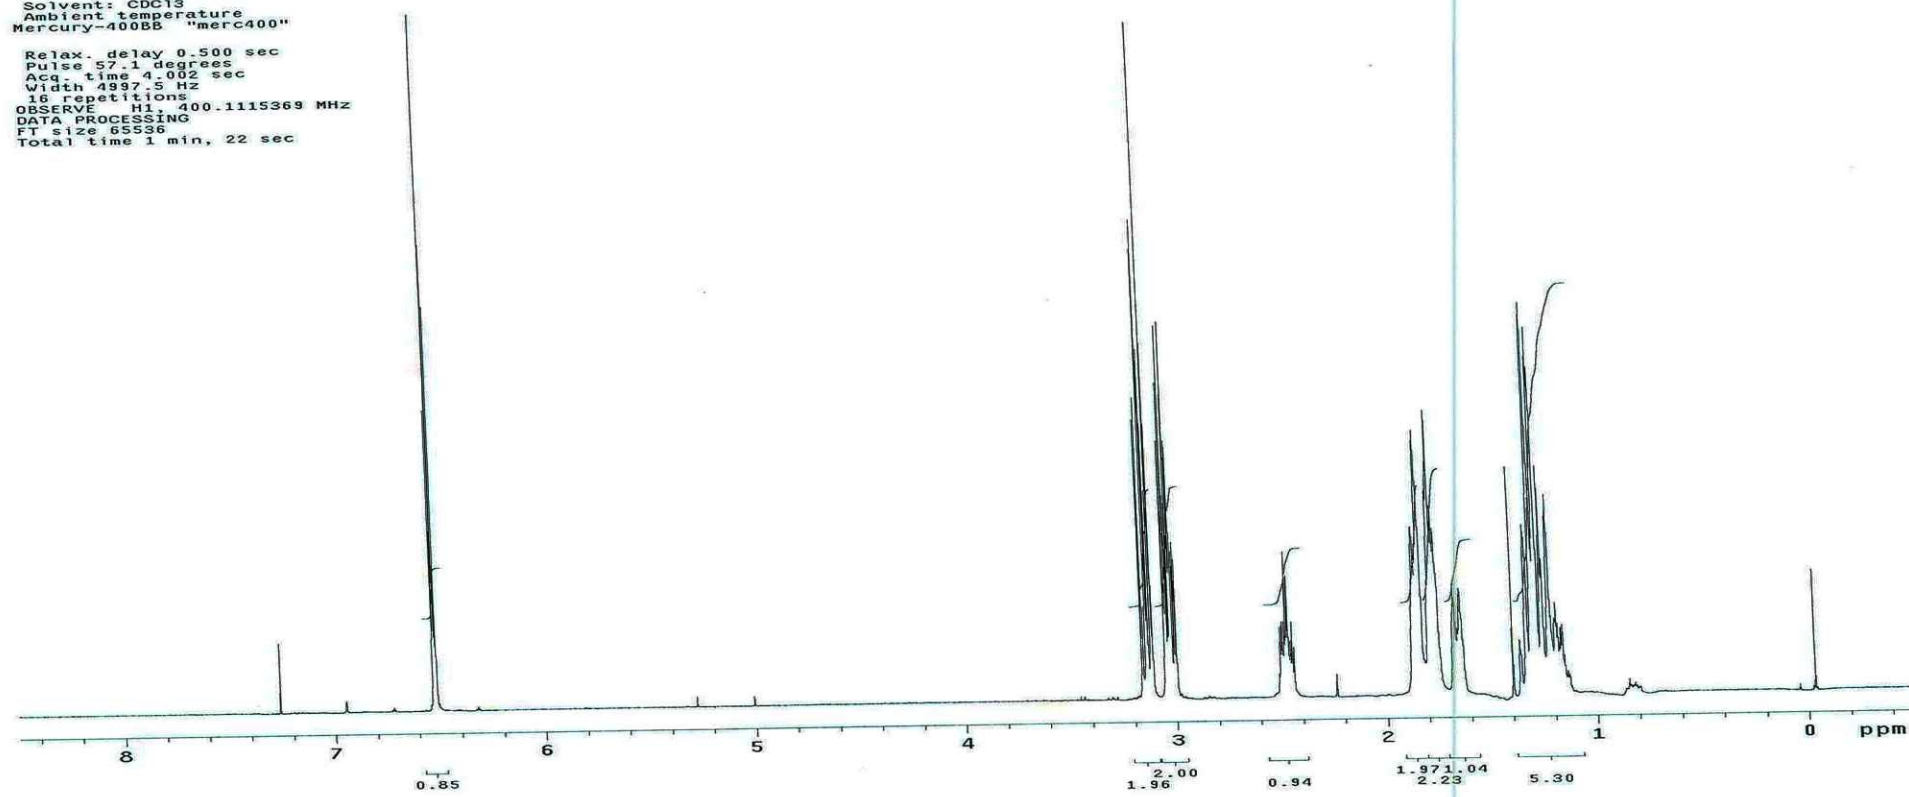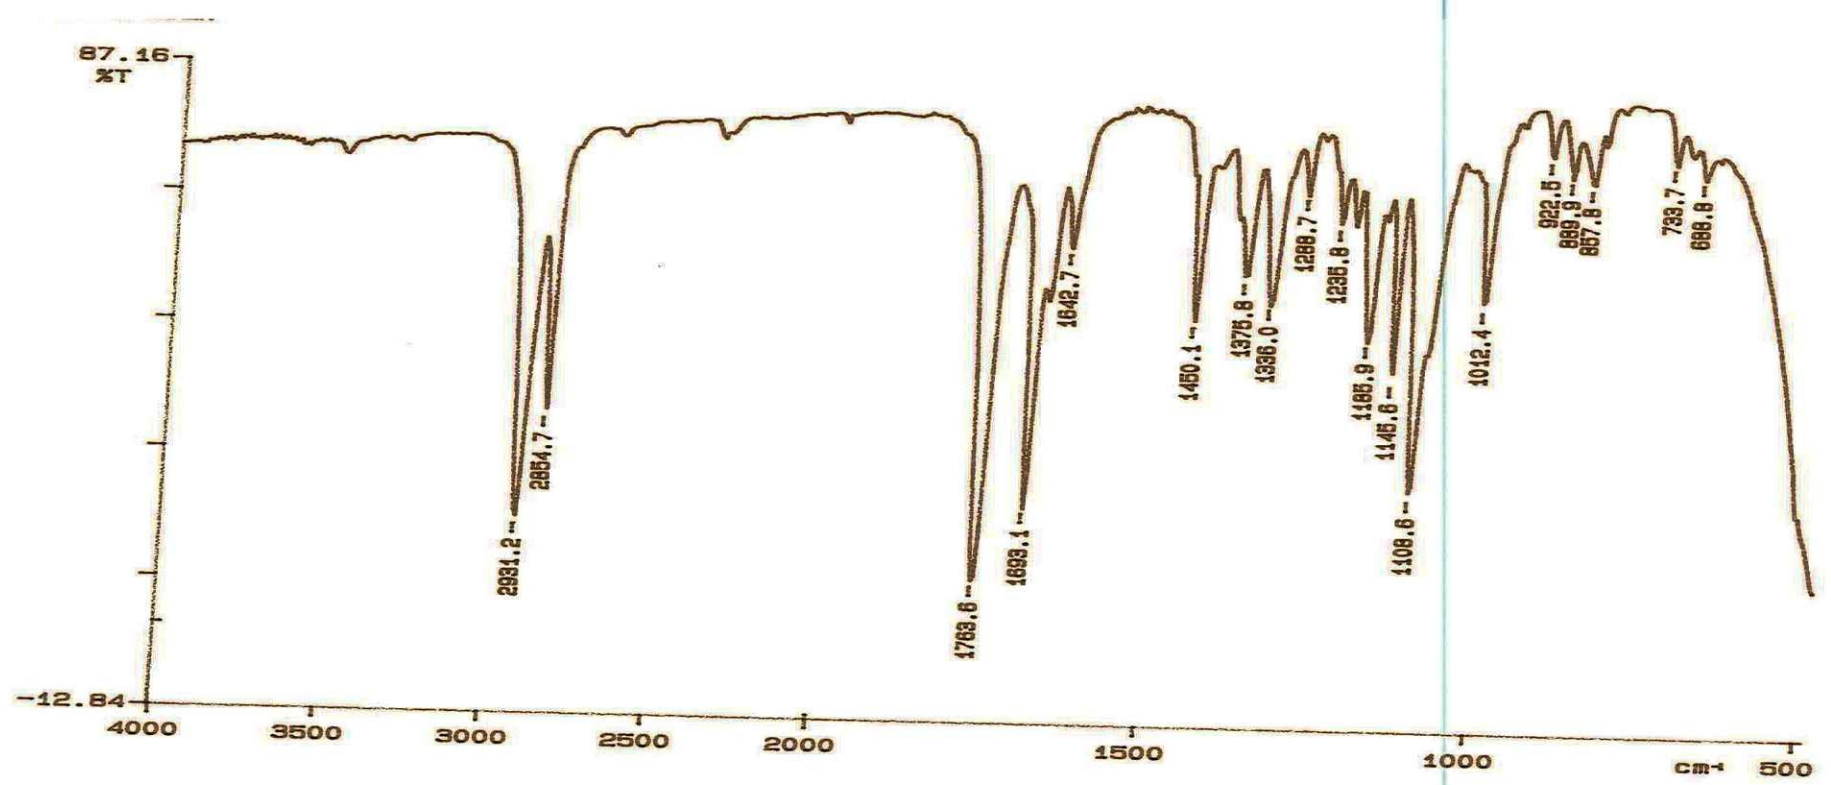

06/12/08 15:38  
X: 4 scans, 4.0cm-1



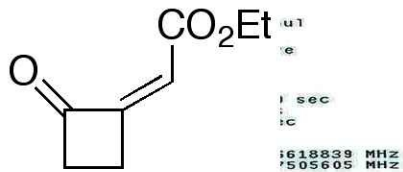

5.33b

Total time 34 min, 17 sec

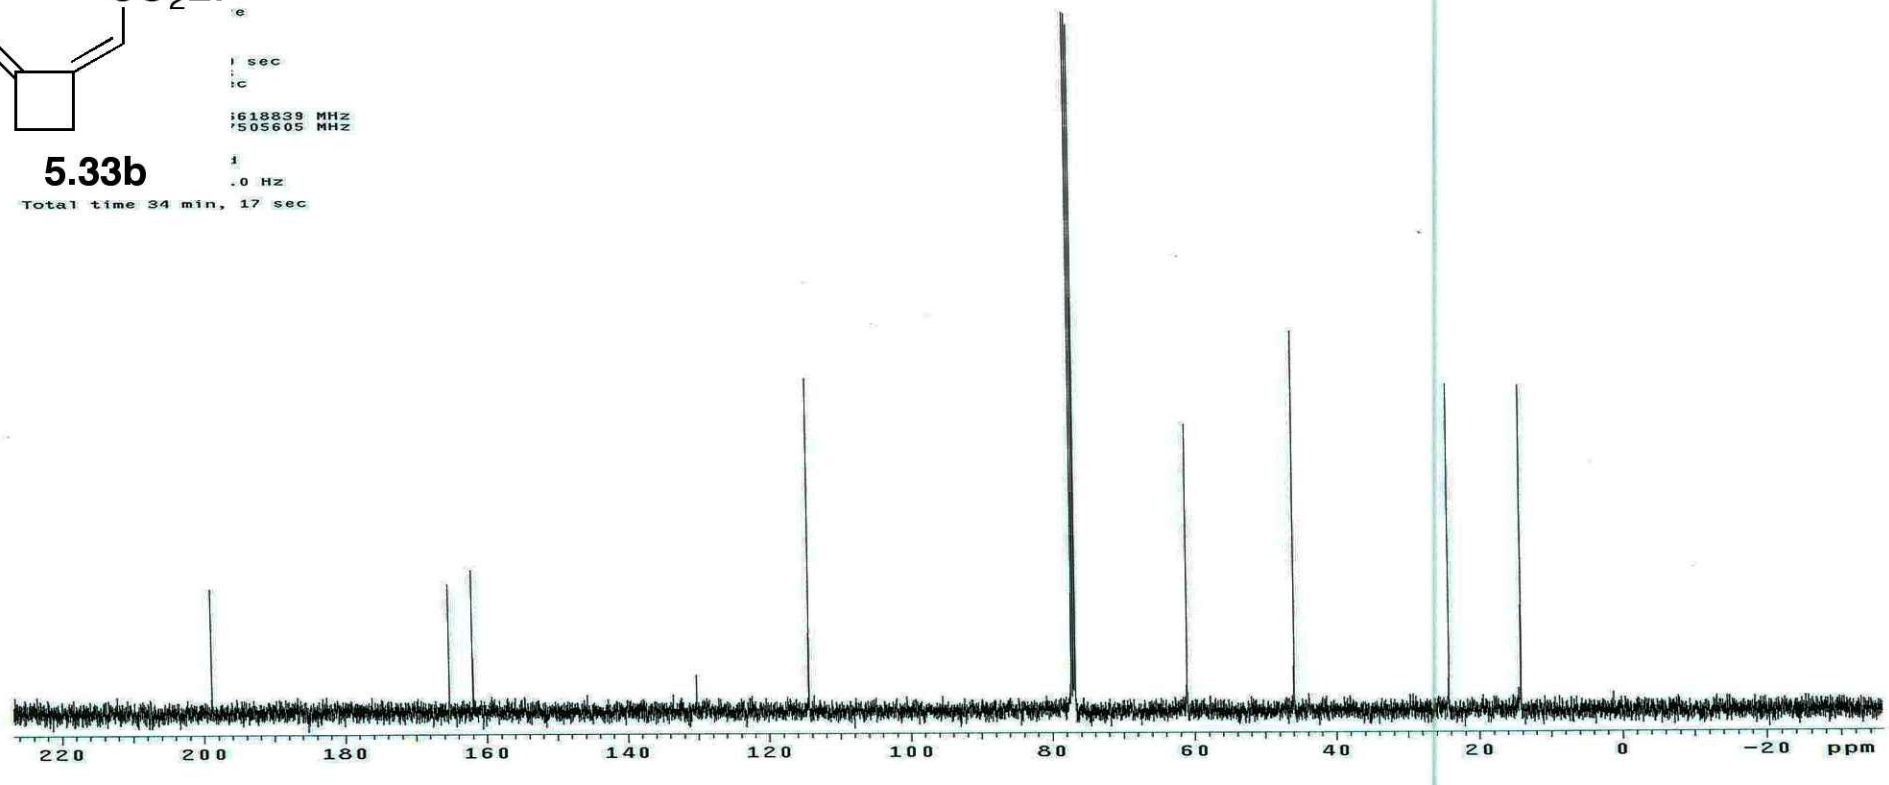

Pulse Sequence: s2pu1  
 Solvent: CDCl3  
 Ambient temperature  
 INOVA-500 "q1500"  
 Pulse 60.0 degrees  
 Acq. time 4.000 sec  
 Width 8000.0 Hz  
 12 repetitions  
 OBSERVE H1, 499.7485735 MHz  
 DATA PROCESSING  
 FT size 131072  
 Total time 1 min, 4 sec

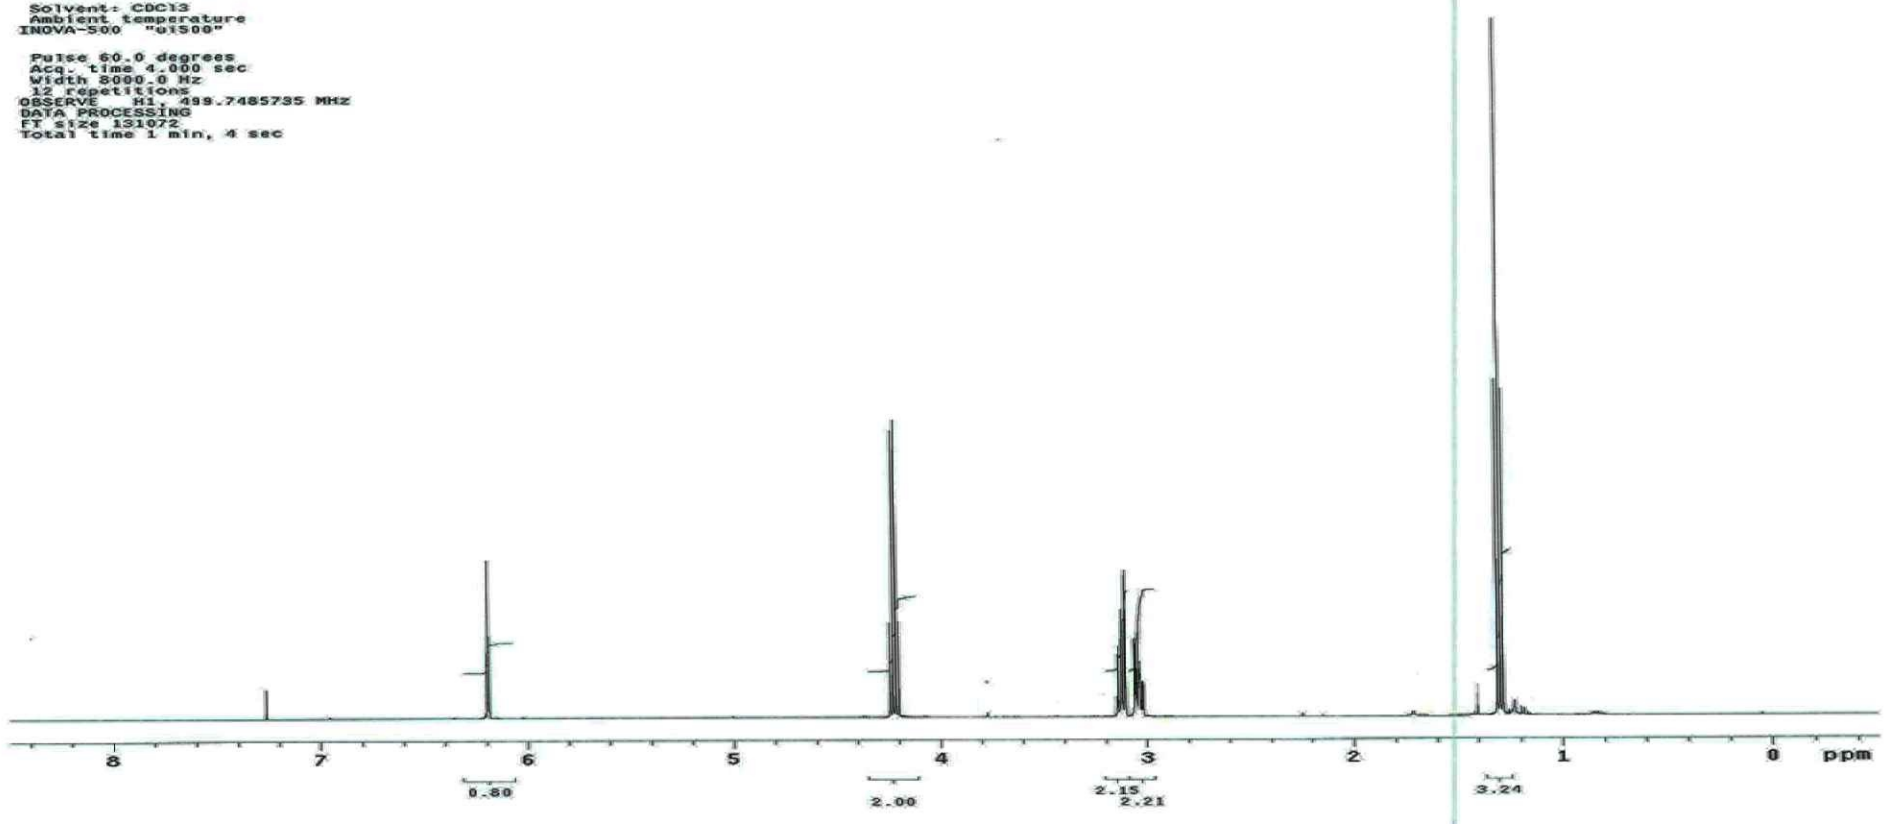

PERKIN ELMER

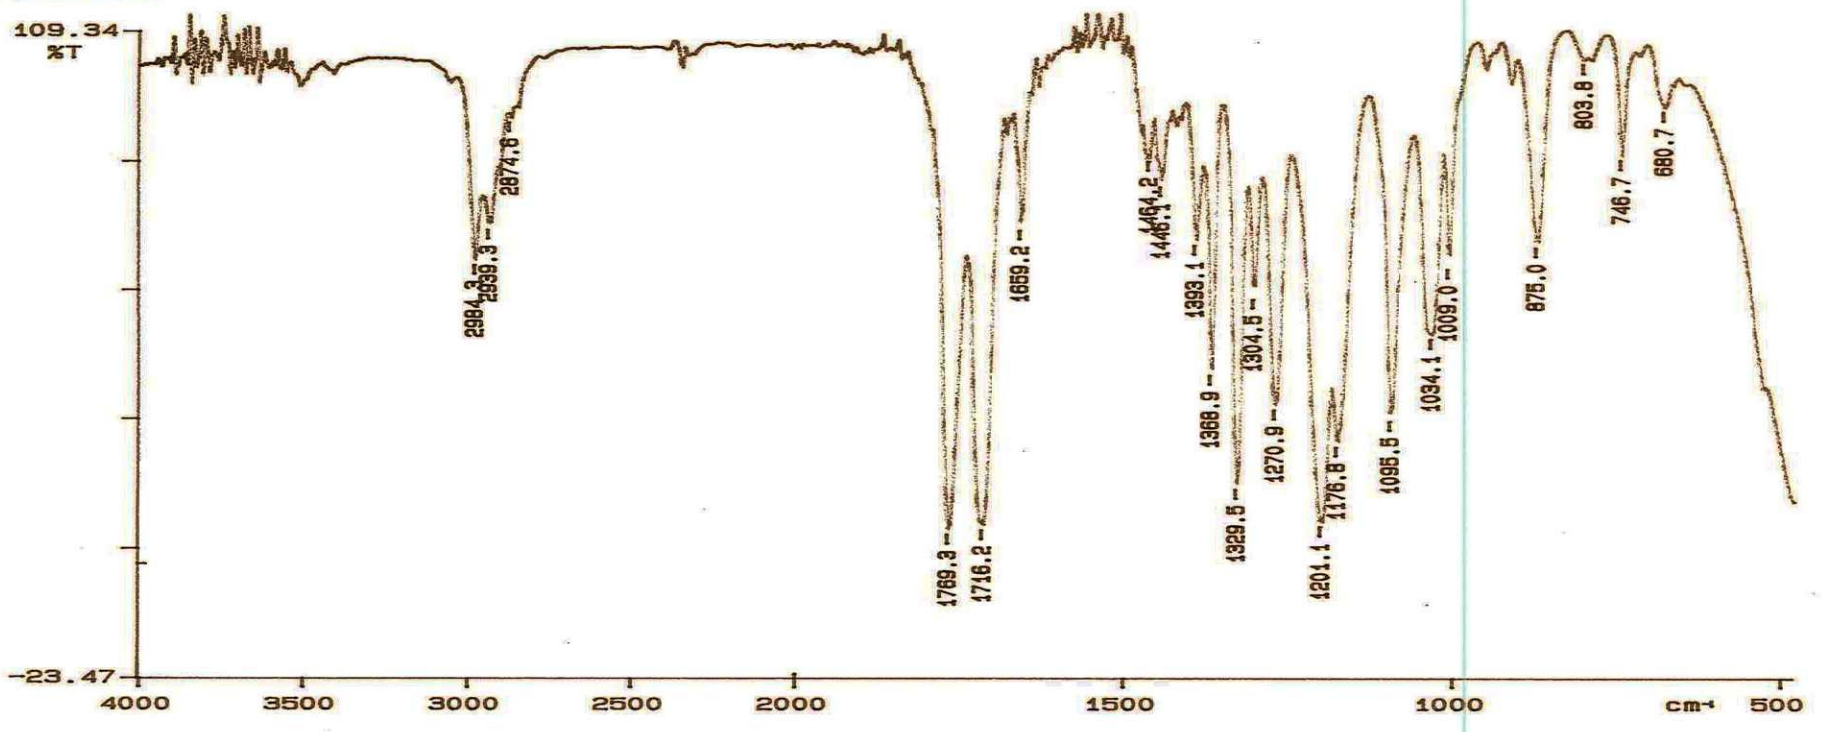

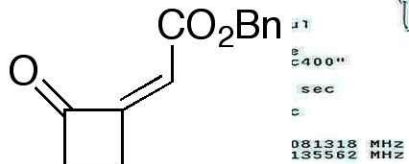

5.33c

081318 MHz  
135562 MHz  
5 Hz  
33 sec

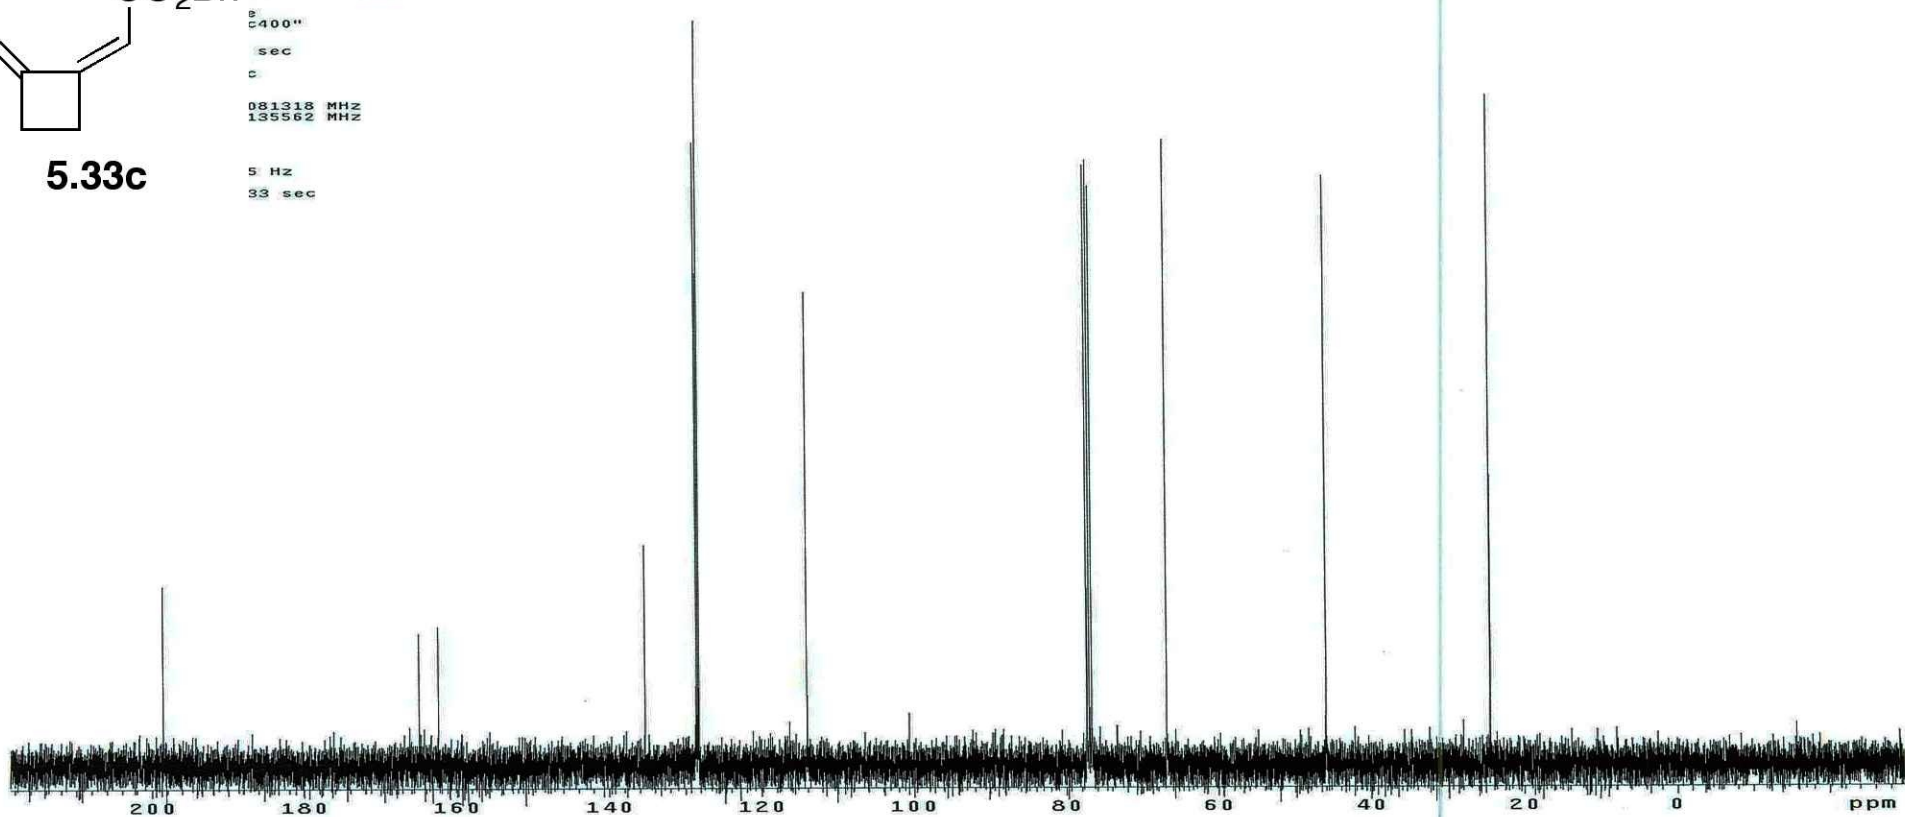

Pulse Sequence: s2pul  
Solvent: CDCl<sub>3</sub>  
Ambient temperature  
Mercury-400BB "merc400"  
Relax. delay 0.500 sec  
Pulse 57.1 degrees  
Acq. time 4.002 sec  
Width 4997.5 Hz  
8 repetitions  
OBSERVE H1 400.1115371 MHz  
DATA PROCESSING  
FT size 65536  
Total time 1 min, 22 sec

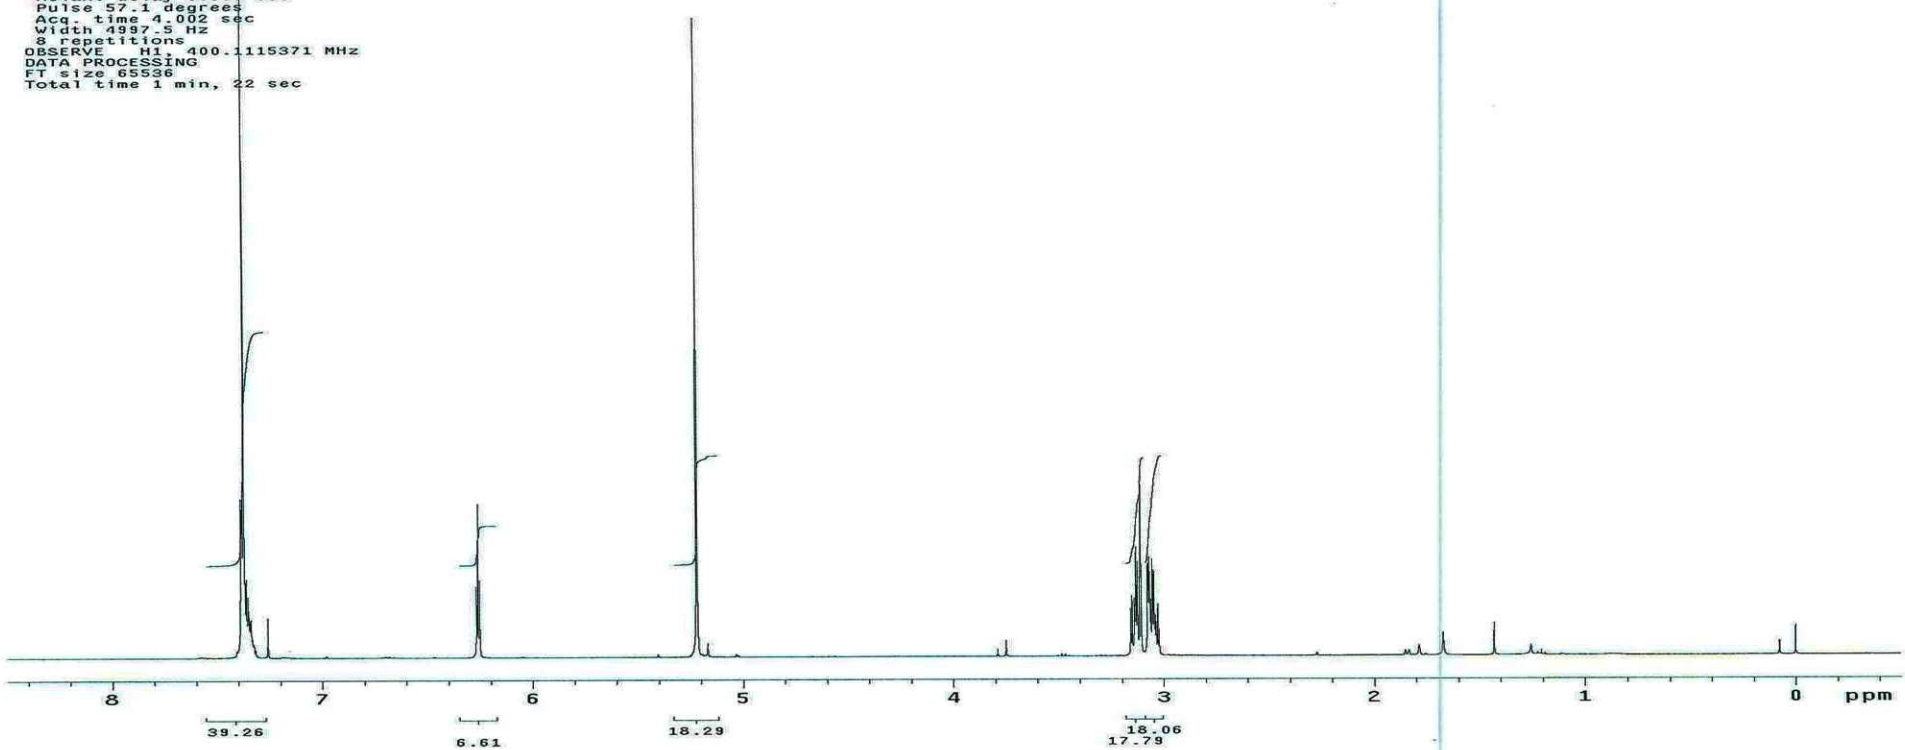

PERKIN ELMER

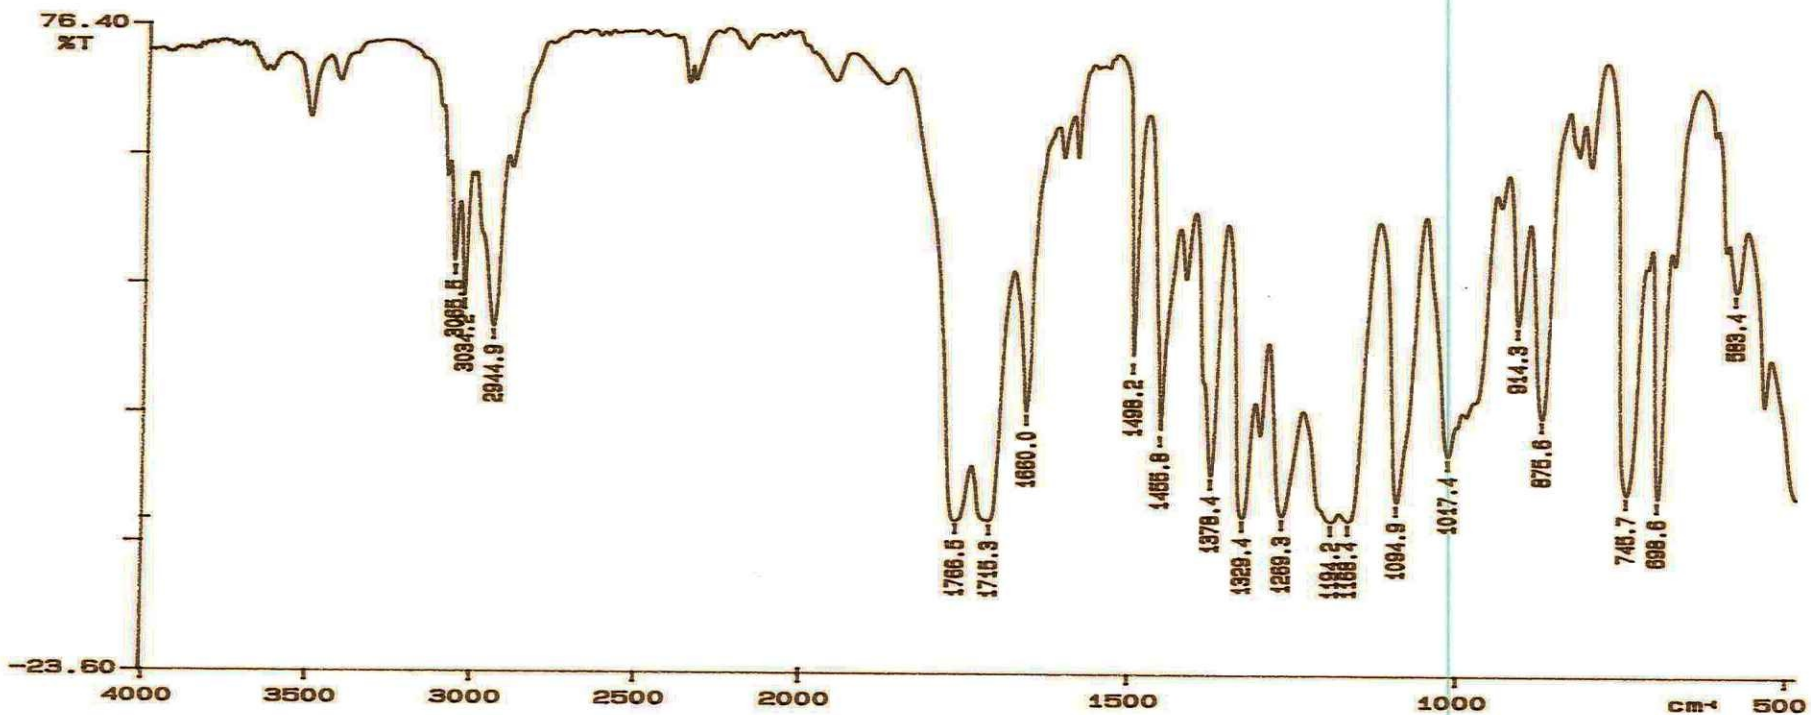



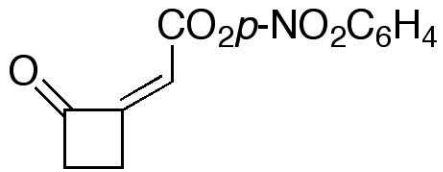

5.33d

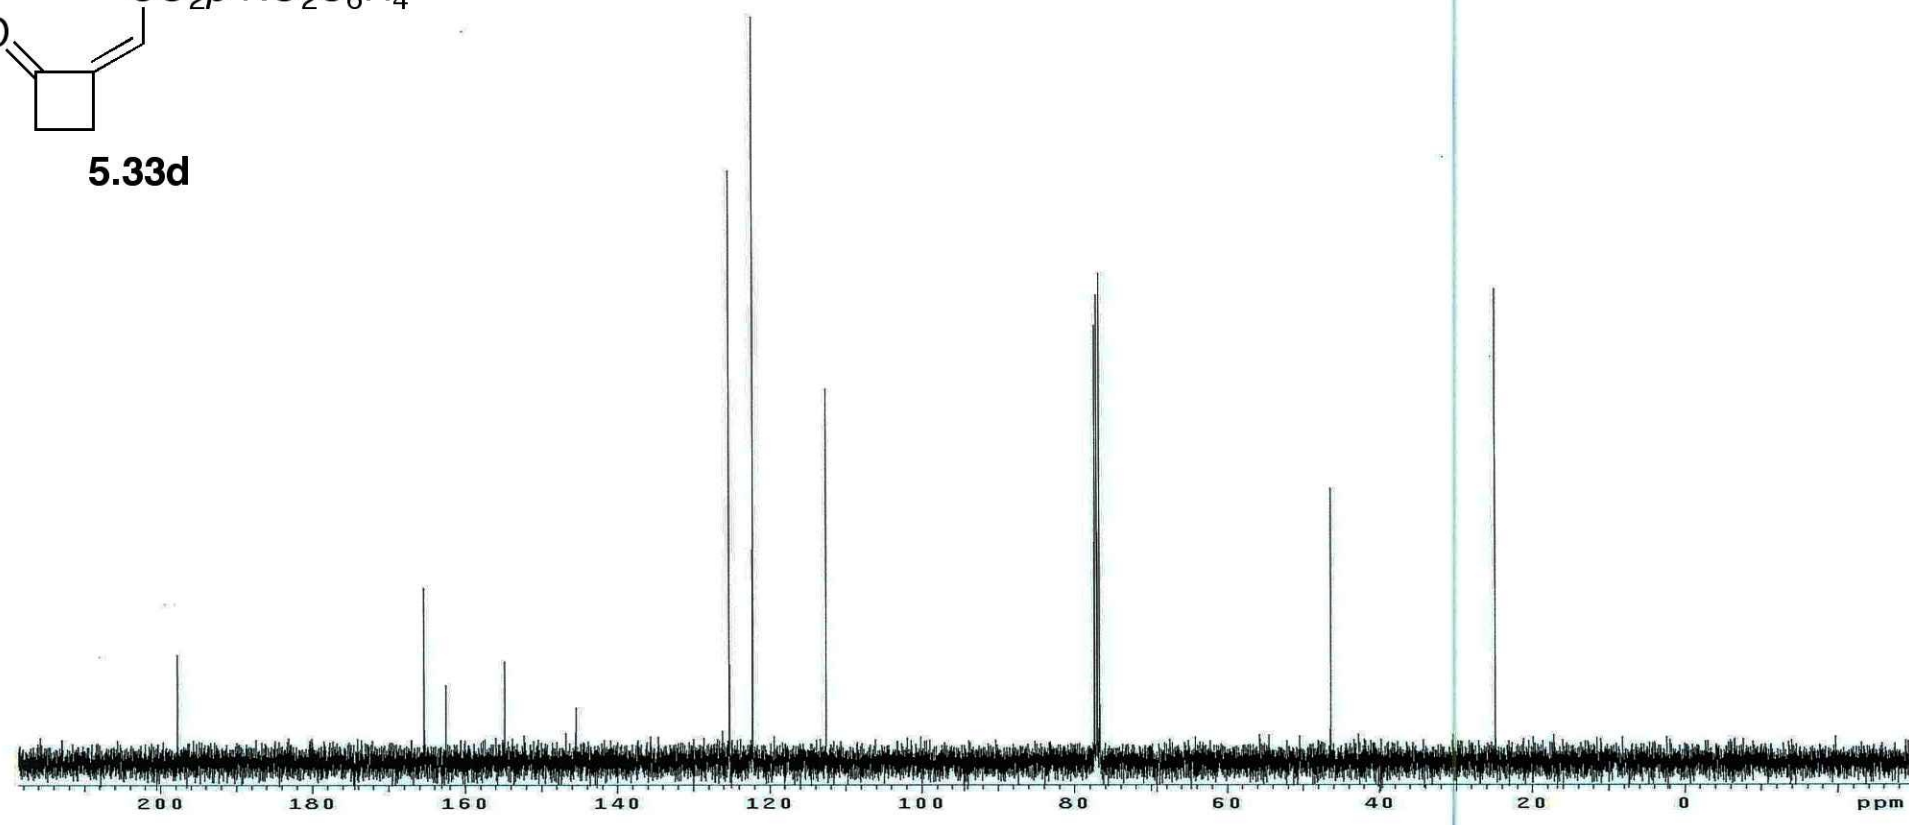

Pulse Sequence: s2pu1  
 Solvent: CDCl3  
 Ambient temperature  
 Mercury-400SB "mrc400"  
 Relax. delay 0.500 sec  
 Pulse 57.1 degrees  
 Acq. time 4.002 sec  
 Width 4897.5 Hz  
 16 repetitions  
 OBSERVE H1 400.1115321 MHz  
 DATA PROCESSING  
 FT size 65536  
 Total time 0 min. 0 sec

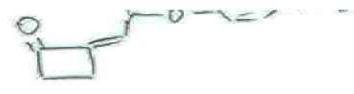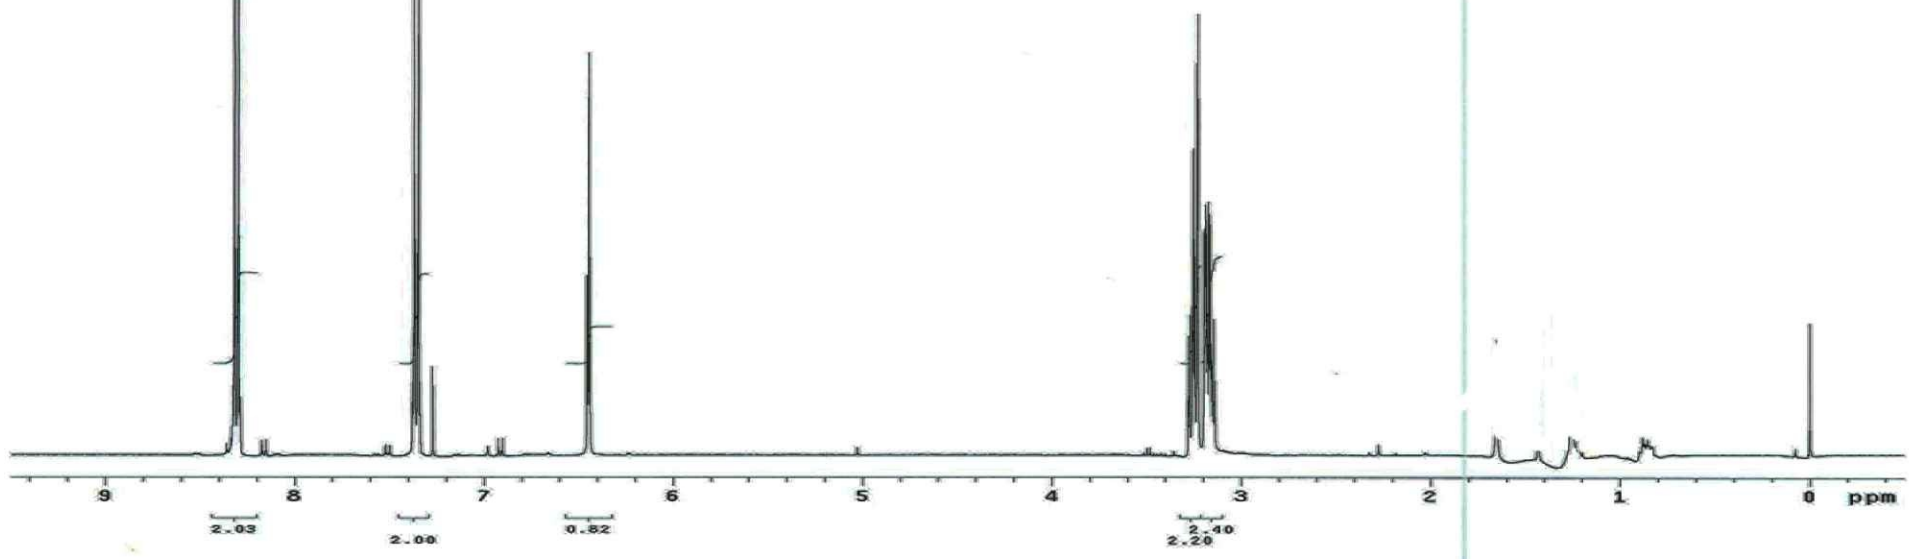

PERKIN ELMER

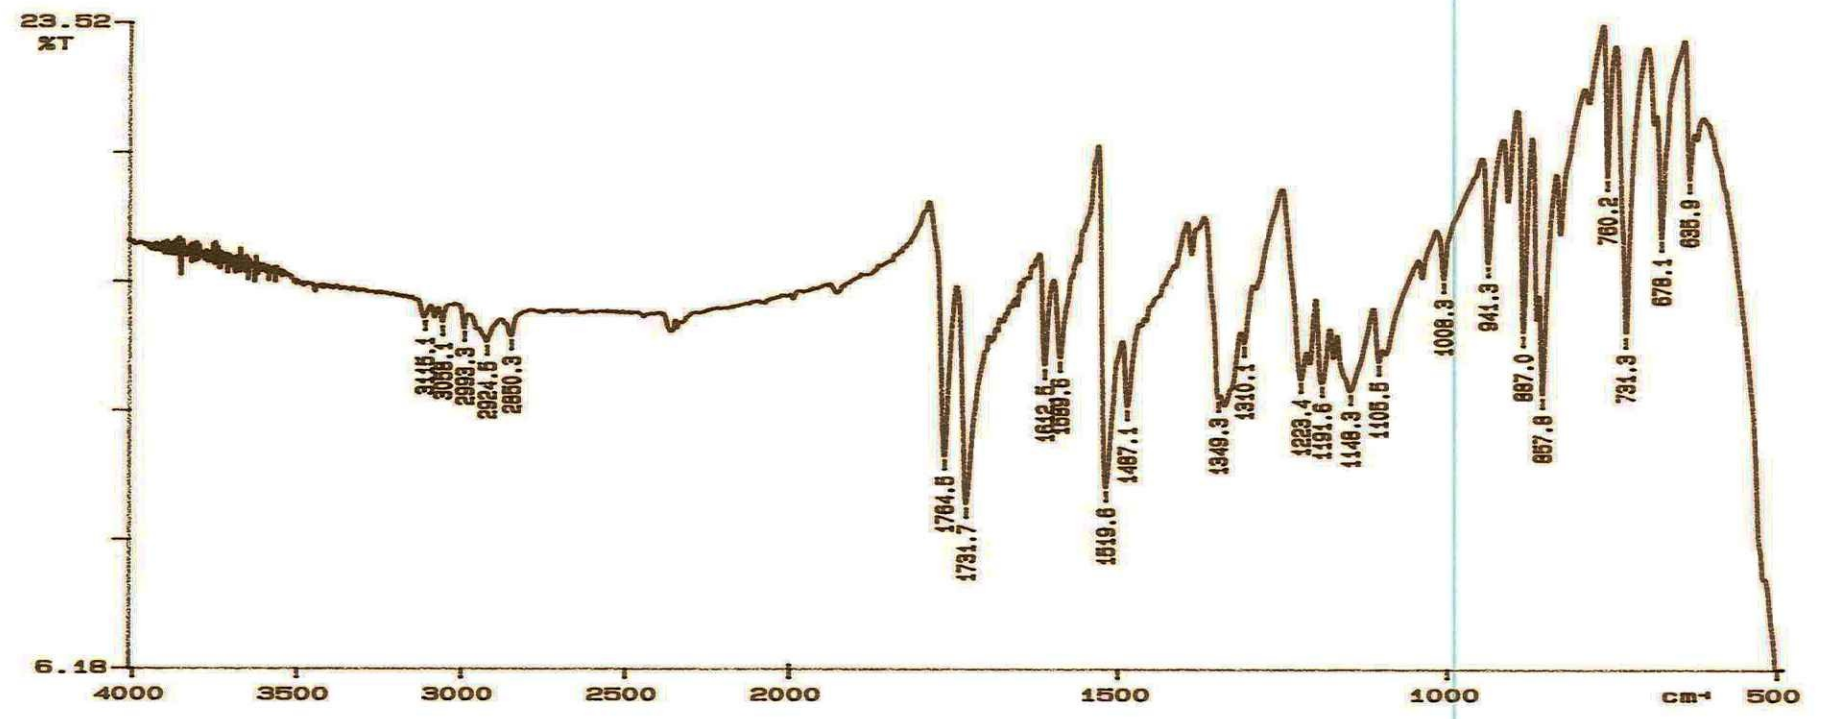

Supplement: NIHMS91458-supplement-1_si_001.pdf [file NIHMS91458-supplement-1_si_001.pdf]
